# Supplementary material for: Maternal H3K36 and H3K27 HMTs protect germline development via regulation of the transcription factor LIN-15B
Source: eLife. 2022 Aug 3;11:e77951. doi: 10.7554/eLife.77951 (PMC9348848; doi:10.7554/eLife.77951)
Supplement: Figure 3—source data 1. — Table showing differential expression statistics for the seven genes tested by smFISH. Log2(fold change) values were calculated by comparing mean transcript counts in mes-4 primordial germ cells (PGCs) to wild-type (wt) PGCs, and the p-value is from a Mann–Whitney test. For transcript profiling analysis, ‘shrunken’ log2(fold change) values were calculated using DESeq2 and ashr in R. [file elife-77951-fig3-data1.xlsx]

## Sheet: Table 1
		smFISH in L1 PGCs		RNA-seq in L1 PGCs
transcript	gene category	log2(fold change)	p-value Mann Whitney test	log2(fold change)	adjusted p-value Wald test
cpg-2	germline-specific	-2.72	1.19e-06	-3.97	0.000143
pgl-3	germline-specific	-0.199	0.328	-0.213	0.634
chs-1	germline-enriched	-0.15	0.277	-0.131	0.758
lsd-1	X-linked	4.8	4.57e-05	8.06	1.26e-16
mbk-1	X-linked	2.75	1.96e-06	9.23	3.26e-31
pek-1	X-linked	2.32	3.27e-06	8.55	3.47e-26
lin-15B	X-linked	1.68	4.16e-06	1.22	0.1
