# Supplementary material for: Maternal H3K36 and H3K27 HMTs protect germline development via regulation of the transcription factor LIN-15B
Source: eLife. 2022 Aug 3;11:e77951. doi: 10.7554/eLife.77951 (PMC9348848; doi:10.7554/eLife.77951)
Supplement: Supplementary file 1. — Six tables show the results of differential expression analysis of mes-4 vs. wt PGCs, mes-4 vs. wt EGCs, mes-3 vs. wt PGCs, mes-3 vs. wt EGCs, mrg-1 vs. wt PGCs, and met-1 vs. wt PGCs. Numbers of biological replicates for each condition are in the legend of Figure 7—figure supplement 1. Each table includes the wormbase ID and public ID for each differentially expressed gene in the respective comparison, a column that indicates whether a differentially expressed gene was upregulated or downregulated, and a column that indicates whether each gene is X-linked or autosomal. [file elife-77951-supp1.xlsx]

## Sheet: mes-4 vs wt PGCs
Wormbase_ID	Public_ID	change_mutant_vs_wt	X_vs_Autosome
WBGene00000040	aco-1	up	X
WBGene00000047	acr-8	up	X
WBGene00000063	act-1	down	Autosome
WBGene00000064	act-2	down	Autosome
WBGene00000074	adm-2	up	X
WBGene00000075	adm-4	up	X
WBGene00000081	ads-1	up	Autosome
WBGene00000106	alg-2	up	Autosome
WBGene00000137	amx-1	up	Autosome
WBGene00000140	anc-1	up	Autosome
WBGene00000157	aps-2	up	X
WBGene00000161	apa-2	up	X
WBGene00000164	apm-3	up	X
WBGene00000180	arc-1	up	Autosome
WBGene00000195	arr-1	up	X
WBGene00000207	asb-2	up	X
WBGene00000210	asg-2	up	X
WBGene00000222	atf-6	up	X
WBGene00000229	atp-2	down	Autosome
WBGene00000245	bca-1	up	X
WBGene00000262	bra-1	up	X
WBGene00000268	bre-3	down	Autosome
WBGene00000294	cas-1	up	X
WBGene00000393	cdf-1	up	X
WBGene00000396	cdh-4	up	Autosome
WBGene00000402	cdh-10	up	Autosome
WBGene00000420	ced-6	down	Autosome
WBGene00000444	ceh-21	up	X
WBGene00000460	ceh-39	up	X
WBGene00000462	ceh-41	up	X
WBGene00000473	cey-2	down	Autosome
WBGene00000475	cey-4	down	Autosome
WBGene00000482	chd-3	up	X
WBGene00000509	cka-1	down	Autosome
WBGene00000527	cle-1	up	Autosome
WBGene00000537	clk-2	down	Autosome
WBGene00000565	cnt-1	down	Autosome
WBGene00000591	coh-1	up	X
WBGene00000681	col-107	up	Autosome
WBGene00000691	col-117	up	Autosome
WBGene00000779	cpn-3	down	Autosome
WBGene00000792	crb-1	up	X
WBGene00000797	crn-4	up	X
WBGene00000802	crt-1	up	Autosome
WBGene00000803	csb-1	up	X
WBGene00000884	cyn-8	up	X
WBGene00000929	dao-3	up	X
WBGene00000959	dgk-2	up	X
WBGene00001008	dlk-1	up	Autosome
WBGene00001025	dnj-7	up	X
WBGene00001032	dnj-14	up	X
WBGene00001046	dnj-28	down	Autosome
WBGene00001081	dpy-22	up	X
WBGene00001082	dpy-23	up	X
WBGene00001086	dpy-27	up	Autosome
WBGene00001093	drp-1	down	Autosome
WBGene00001122	dyf-6	up	X
WBGene00001130	dyn-1	up	X
WBGene00001168	eef-1A.1	down	Autosome
WBGene00001169	eef-1A.2	up	X
WBGene00001177	egl-8	up	Autosome
WBGene00001329	epn-1	up	X
WBGene00001330	eps-8	up	Autosome
WBGene00001423	fib-1	down	Autosome
WBGene00001451	flp-8	up	X
WBGene00001483	fog-3	down	Autosome
WBGene00001520	gas-1	up	X
WBGene00001564	gei-7	up	Autosome
WBGene00001569	gei-12	up	X
WBGene00001583	gfi-3	up	X
WBGene00001617	glr-6	up	X
WBGene00001649	gob-1	up	X
WBGene00001819	haf-9	up	Autosome
WBGene00001844	hid-1	up	X
WBGene00001854	hil-3	up	X
WBGene00001872	him-14	down	Autosome
WBGene00001879	his-5	up	Autosome
WBGene00001898	his-24	up	X
WBGene00001912	his-38	up	X
WBGene00001945	his-71	up	X
WBGene00001977	hmg-12	down	Autosome
WBGene00001994	hpk-1	up	X
WBGene00002007	hsp-3	up	X
WBGene00002017	hsp-16.11	up	Autosome
WBGene00002019	hsp-16.48	up	Autosome
WBGene00002020	hsp-16.49	up	Autosome
WBGene00002027	hsr-9	down	Autosome
WBGene00002029	hst-2	up	X
WBGene00002044	hyl-2	up	X
WBGene00002045	icd-1	down	Autosome
WBGene00002060	ife-2	up	X
WBGene00002061	ife-3	down	Autosome
WBGene00002064	iff-1	down	Autosome
WBGene00002073	ima-2	down	Autosome
WBGene00002207	kin-25	up	X
WBGene00002220	klp-8	up	X
WBGene00002263	lea-1	down	Autosome
WBGene00002295	let-19	up	Autosome
WBGene00002324	let-49	down	Autosome
WBGene00002632	let-413	up	Autosome
WBGene00003036	lin-53	down	Autosome
WBGene00003053	lmp-1	up	X
WBGene00003072	lrp-2	up	Autosome
WBGene00003084	lst-2	up	X
WBGene00003086	lst-4	down	Autosome
WBGene00003111	mab-20	up	Autosome
WBGene00003144	max-2	down	Autosome
WBGene00003149	mbk-1	up	X
WBGene00003157	mcm-5	down	Autosome
WBGene00003185	mek-1	up	X
WBGene00003246	mig-14	down	Autosome
WBGene00003254	mig-23	up	X
WBGene00003410	mrp-4	up	X
WBGene00003411	mrp-5	up	X
WBGene00003414	mrp-8	up	Autosome
WBGene00003588	nex-1	down	Autosome
WBGene00003612	nhr-13	up	Autosome
WBGene00003614	nhr-15	up	Autosome
WBGene00003636	nhr-46	up	Autosome
WBGene00003733	nhx-5	up	X
WBGene00003822	nsy-1	up	Autosome
WBGene00003883	osm-1	up	X
WBGene00003903	pab-2	up	X
WBGene00003904	pabp-2	down	Autosome
WBGene00003911	pak-1	up	X
WBGene00003936	pat-12	up	Autosome
WBGene00003947	pbs-1	down	Autosome
WBGene00003963	pdi-2	up	X
WBGene00003970	pek-1	up	X
WBGene00004053	pme-5	up	Autosome
WBGene00004068	pnk-1	down	Autosome
WBGene00004075	pod-1	down	Autosome
WBGene00004078	pos-1	down	Autosome
WBGene00004089	ppk-3	up	X
WBGene00004094	ppw-2	down	Autosome
WBGene00004131	pqn-44	up	Autosome
WBGene00004143	pqn-59	down	Autosome
WBGene00004148	pqn-65	up	X
WBGene00004179	prg-2	down	Autosome
WBGene00004245	puf-9	up	X
WBGene00004270	rab-6.2	up	X
WBGene00004300	ram-2	up	Autosome
WBGene00004302	ran-1	down	Autosome
WBGene00004313	rbc-1	up	X
WBGene00004317	rbg-1	up	X
WBGene00004352	rgs-9	up	X
WBGene00004354	rgs-11	up	X
WBGene00004375	rme-4	up	X
WBGene00004408	rla-0	down	Autosome
WBGene00004413	rpl-2	down	Autosome
WBGene00004415	rpl-4	down	Autosome
WBGene00004416	rpl-5	down	Autosome
WBGene00004417	rpl-6	down	Autosome
WBGene00004418	rpl-7	down	Autosome
WBGene00004421	rpl-10	down	Autosome
WBGene00004422	rpl-11.1	down	Autosome
WBGene00004423	rpl-11.2	up	X
WBGene00004425	rpl-13	down	Autosome
WBGene00004427	rpl-15	down	Autosome
WBGene00004430	rpl-18	down	Autosome
WBGene00004431	rpl-19	down	Autosome
WBGene00004432	rpl-20	down	Autosome
WBGene00004433	rpl-21	down	Autosome
WBGene00004434	rpl-22	down	Autosome
WBGene00004435	rpl-23	down	Autosome
WBGene00004438	rpl-25.1	up	X
WBGene00004469	rps-0	down	Autosome
WBGene00004470	rps-1	down	Autosome
WBGene00004471	rps-2	down	Autosome
WBGene00004472	rps-3	down	Autosome
WBGene00004473	rps-4	down	Autosome
WBGene00004474	rps-5	down	Autosome
WBGene00004475	rps-6	down	Autosome
WBGene00004476	rps-7	down	Autosome
WBGene00004477	rps-8	down	Autosome
WBGene00004478	rps-9	down	Autosome
WBGene00004479	rps-10	down	Autosome
WBGene00004491	rps-22	down	Autosome
WBGene00004682	rsd-3	up	X
WBGene00004727	sax-1	up	X
WBGene00004774	sem-5	up	X
WBGene00004804	skn-1	down	Autosome
WBGene00004808	skr-2	down	Autosome
WBGene00004855	sma-1	up	Autosome
WBGene00004893	sms-2	up	X
WBGene00004913	snn-1	up	Autosome
WBGene00004914	snr-1	down	Autosome
WBGene00004963	spe-9	up	Autosome
WBGene00005008	spr-3	up	X
WBGene00006066	sto-4	up	X
WBGene00006067	sto-5	up	X
WBGene00006351	sur-5	up	X
WBGene00006353	sur-7	up	X
WBGene00006368	sym-3	up	X
WBGene00006369	sym-4	up	X
WBGene00006371	syx-3	up	X
WBGene00006393	taf-11.1	up	X
WBGene00006394	taf-11.2	up	Autosome
WBGene00006408	tag-18	up	X
WBGene00006410	nck-1	up	X
WBGene00006431	tag-52	up	X
WBGene00006432	tag-53	up	X
WBGene00006433	sdhb-1	down	Autosome
WBGene00006472	tag-123	up	X
WBGene00006477	tag-130	up	X
WBGene00006493	tag-147	up	X
WBGene00006494	hke-4.2	up	X
WBGene00006517	tag-172	up	X
WBGene00006529	tba-2	down	Autosome
WBGene00006536	tbb-1	down	Autosome
WBGene00006537	tbb-2	down	Autosome
WBGene00006602	tps-1	up	X
WBGene00006714	ubc-19	down	Autosome
WBGene00006757	unc-18	up	X
WBGene00006780	unc-44	up	Autosome
WBGene00006804	unc-71	down	Autosome
WBGene00006811	unc-79	up	Autosome
WBGene00006816	unc-84	up	X
WBGene00006856	usp-14	down	Autosome
WBGene00006876	vab-10	up	Autosome
WBGene00006890	vem-1	up	X
WBGene00006921	vha-12	up	X
WBGene00007011	mdt-1.2	up	X
WBGene00007059	vps-52	up	X
WBGene00007109	B0035.6	down	Autosome
WBGene00007132	B0284.2	up	Autosome
WBGene00007197	B0513.5	up	Autosome
WBGene00007267	C03A3.2	up	X
WBGene00007284	C03H12.1	up	X
WBGene00007287	gck-4	up	X
WBGene00007290	C04B4.2	up	X
WBGene00007297	C04F12.1	up	Autosome
WBGene00007348	C05G5.2	up	X
WBGene00007350	C05G5.4	up	X
WBGene00007516	C11E4.1	down	X
WBGene00007520	C11E4.6	up	X
WBGene00007524	C11G6.3	up	X
WBGene00007528	C11H1.2	up	X
WBGene00007640	C17D12.7	up	Autosome
WBGene00007668	C18B12.6	up	X
WBGene00007675	C18D4.6	up	Autosome
WBGene00007750	syg-2	up	X
WBGene00007773	C27C12.3	up	X
WBGene00007774	C27C12.4	up	X
WBGene00007846	C31E10.5	up	X
WBGene00007847	C31E10.6	up	X
WBGene00007848	C31E10.7	up	X
WBGene00007910	C34B4.5	up	Autosome
WBGene00007941	C34F6.7	up	X
WBGene00007942	idh-2	up	X
WBGene00007943	C34F6.9	up	X
WBGene00007955	C35C5.3	up	X
WBGene00007956	C35C5.6	up	X
WBGene00007980	C36E8.1	down	Autosome
WBGene00007993	C37E2.1	up	X
WBGene00008003	C38D4.1	down	Autosome
WBGene00008010	C38D9.2	up	Autosome
WBGene00008085	C44C10.4	up	X
WBGene00008207	C49F5.3	up	X
WBGene00008210	C49F5.6	up	X
WBGene00008218	nasp-2	down	Autosome
WBGene00008283	C53D6.6	up	Autosome
WBGene00008353	D1025.1	up	X
WBGene00008585	F08G12.1	up	X
WBGene00008586	F08G12.2	up	X
WBGene00008591	F08H9.3	up	Autosome
WBGene00008641	pch-2	down	Autosome
WBGene00008690	F11C1.1	up	X
WBGene00008691	mff-1	up	X
WBGene00008694	F11C1.5	up	X
WBGene00008740	F13D12.5	down	Autosome
WBGene00008749	F13E6.5	up	X
WBGene00008780	F14B4.2	down	Autosome
WBGene00008805	git-1	up	X
WBGene00008806	mboa-7	up	X
WBGene00008807	F14F3.4	up	X
WBGene00008808	F14F4.1	up	X
WBGene00008862	F15D4.5	up	Autosome
WBGene00008863	F15D4.6	up	Autosome
WBGene00008882	F16B12.6	up	X
WBGene00008927	F17H10.3	up	X
WBGene00008934	F18C12.3	down	Autosome
WBGene00008945	F19B2.6	up	Autosome
WBGene00008974	tbc-1	up	X
WBGene00008975	F20D1.3	up	X
WBGene00008976	plp-2	up	X
WBGene00008979	F20D1.9	up	X
WBGene00008980	tag-299	up	X
WBGene00008992	F21A3.2	up	Autosome
WBGene00009027	F21G4.6	up	X
WBGene00009106	acs-12	up	Autosome
WBGene00009113	F25D7.4	down	Autosome
WBGene00009122	tct-1	down	Autosome
WBGene00009161	F26E4.6	down	Autosome
WBGene00009166	F26F2.1	up	Autosome
WBGene00009182	F26H11.4	down	Autosome
WBGene00009299	F31E9.6	up	Autosome
WBGene00009302	F31F6.3	up	X
WBGene00009552	piki-1	up	X
WBGene00009674	nucb-1	up	X
WBGene00009691	F44E5.4	up	Autosome
WBGene00009726	tbc-13	up	X
WBGene00009738	F45H7.6	up	Autosome
WBGene00009772	ztf-7	down	Autosome
WBGene00009793	pkn-1	up	X
WBGene00009801	F47A4.5	up	X
WBGene00009823	F47G4.2	up	Autosome
WBGene00009888	F49E2.5	up	X
WBGene00009962	F53B6.7	down	Autosome
WBGene00010009	F53H4.4	up	X
WBGene00010011	F53H4.6	up	X
WBGene00010083	F55B11.1	up	Autosome
WBGene00010115	aakb-1	up	X
WBGene00010172	oac-36	up	Autosome
WBGene00010185	F57A10.4	down	Autosome
WBGene00010199	bet-2	up	X
WBGene00010232	F58B3.6	down	Autosome
WBGene00010338	F59F4.3	up	X
WBGene00010397	H13N06.4	up	X
WBGene00010426	H37A05.2	up	Autosome
WBGene00010433	H40L08.1	up	X
WBGene00010493	meg-2	up	X
WBGene00010552	K04C1.2	up	X
WBGene00010556	rack-1	down	Autosome
WBGene00010572	wdr-5.2	up	X
WBGene00010582	K05C4.5	down	Autosome
WBGene00010609	dut-1	down	Autosome
WBGene00010627	K07C5.4	down	Autosome
WBGene00010639	K07F5.15	down	Autosome
WBGene00010642	K07G5.3	up	Autosome
WBGene00010700	nipi-3	up	X
WBGene00010702	usp-33	up	X
WBGene00010725	erv-46	up	X
WBGene00010726	K09E9.3	up	X
WBGene00010788	sulp-4	up	Autosome
WBGene00010972	R01H10.4	up	Autosome
WBGene00010983	R03A10.3	up	X
WBGene00010984	nkat-3	up	X
WBGene00010993	R03E1.2	up	X
WBGene00011059	R06C1.4	up	Autosome
WBGene00011139	R08B4.3	up	X
WBGene00011152	R09A8.1	up	X
WBGene00011153	R09A8.2	up	X
WBGene00011155	R09B3.2	down	Autosome
WBGene00011230	nud-2	down	Autosome
WBGene00011231	R11A5.3	up	Autosome
WBGene00011291	R102.4	up	Autosome
WBGene00011436	T04F3.1	up	Autosome
WBGene00011441	T04F8.2	up	X
WBGene00011480	T05E11.3	up	Autosome
WBGene00011559	umps-1	down	Autosome
WBGene00011607	T08D2.2	down	X
WBGene00011614	nfya-1	up	X
WBGene00011615	lsd-1	up	X
WBGene00011638	ostb-1	down	Autosome
WBGene00011679	ucr-2.2	up	X
WBGene00011680	T10B10.3	up	X
WBGene00011820	T18D3.1	up	X
WBGene00011869	dod-6	down	Autosome
WBGene00011990	T24D5.2	up	X
WBGene00012121	T28C6.7	up	Autosome
WBGene00012158	ucr-2.1	up	X
WBGene00012191	W02A2.8	up	Autosome
WBGene00012198	W02B8.2	up	Autosome
WBGene00012258	W04G3.5	up	X
WBGene00012295	W06B3.1	up	X
WBGene00012299	W06D11.1	up	X
WBGene00012315	immt-2	down	Autosome
WBGene00012326	W07E11.1	up	X
WBGene00012357	W09D6.4	up	Autosome
WBGene00012358	W09D6.5	down	Autosome
WBGene00012512	ekl-5	up	X
WBGene00012513	Y26E6A.2	up	X
WBGene00012552	Y37D8A.12	down	Autosome
WBGene00012698	Y39B6A.40	down	Autosome
WBGene00012758	Y41C4A.12	down	Autosome
WBGene00012970	Y48A6B.9	down	Autosome
WBGene00012983	men-1	down	Autosome
WBGene00013014	Y48E1C.1	down	Autosome
WBGene00013030	Y49E10.4	down	Autosome
WBGene00013041	pstk-1	down	Autosome
WBGene00013096	mcd-1	down	Autosome
WBGene00013133	Y53C10A.2	down	Autosome
WBGene00013247	Y57A10A.2	down	Autosome
WBGene00013279	Y57A10B.7	up	Autosome
WBGene00013440	Y66D12A.14	up	Autosome
WBGene00013587	Y80D3A.9	down	Autosome
WBGene00013613	Y102A5C.4	up	Autosome
WBGene00013683	zoo-1	up	Autosome
WBGene00013755	fbxa-115	up	Autosome
WBGene00013766	prmt-1	down	Autosome
WBGene00013847	cls-3	up	Autosome
WBGene00013894	ZC434.8	down	Autosome
WBGene00013917	ZC504.3	up	X
WBGene00013919	ZC506.1	up	X
WBGene00013965	ZK287.4	up	Autosome
WBGene00013998	ZK550.4	down	Autosome
WBGene00014095	ZK829.4	down	Autosome
WBGene00015014	bath-24	up	Autosome
WBGene00015095	B0261.7	down	Autosome
WBGene00015102	cpg-2	down	Autosome
WBGene00015161	pho-5	down	Autosome
WBGene00015168	tag-320	up	X
WBGene00015227	B0507.10	up	Autosome
WBGene00015324	C02B8.6	up	X
WBGene00015391	sdha-1	up	X
WBGene00015429	sor-3	up	X
WBGene00015456	C04G6.6	up	Autosome
WBGene00015469	C05D2.8	up	Autosome
WBGene00015552	C06G3.6	up	Autosome
WBGene00015565	C07D8.6	up	X
WBGene00015662	C10A4.1	up	X
WBGene00015680	egal-1	up	Autosome
WBGene00015735	pdfr-1	up	Autosome
WBGene00015778	C14F11.1	up	X
WBGene00015787	C15B12.6	up	X
WBGene00015791	C15C7.5	up	X
WBGene00015838	math-9	up	Autosome
WBGene00015866	C16E9.2	up	X
WBGene00015868	C16H3.3	up	X
WBGene00015885	fbxa-65	up	Autosome
WBGene00015922	C17H11.2	up	X
WBGene00015955	C18B2.4	up	X
WBGene00016009	C23F12.4	up	X
WBGene00016061	C24G6.6	up	Autosome
WBGene00016068	C24H10.2	up	X
WBGene00016087	C25A11.2	up	X
WBGene00016138	flh-2	up	Autosome
WBGene00016346	fbxa-120	up	X
WBGene00016406	C34D10.1	up	X
WBGene00016418	C34G6.1	down	Autosome
WBGene00016438	C35B8.3	up	X
WBGene00016469	C36B7.6	up	X
WBGene00016485	C36C9.1	up	X
WBGene00016489	C36E6.1	up	X
WBGene00016507	C37H5.3	up	Autosome
WBGene00016511	C37H5.13	up	Autosome
WBGene00016576	C41H7.6	up	Autosome
WBGene00016629	C44B7.7	up	Autosome
WBGene00016642	C44C1.2	up	X
WBGene00016656	C44E4.7	down	Autosome
WBGene00016661	C45B2.6	up	X
WBGene00016698	C46A5.1	up	Autosome
WBGene00016704	C46C11.1	up	X
WBGene00016737	C47C12.4	up	X
WBGene00016867	C52B9.4	up	X
WBGene00016868	C52B9.8	up	X
WBGene00016902	C53D5.1	up	Autosome
WBGene00016934	mboa-3	up	X
WBGene00016968	epg-5	up	Autosome
WBGene00016984	C56G3.1	up	X
WBGene00016995	D1005.1	up	X
WBGene00017046	utx-1	up	X
WBGene00017075	D2096.8	down	Autosome
WBGene00017101	E02H9.3	up	Autosome
WBGene00017166	aldo-2	down	Autosome
WBGene00017177	F02E8.4	up	X
WBGene00017178	atg-16.1	up	X
WBGene00017244	apy-1	up	X
WBGene00017265	F08F3.9	down	Autosome
WBGene00017373	F10G7.10	up	Autosome
WBGene00017487	F15E6.6	up	Autosome
WBGene00017534	F17A9.2	down	Autosome
WBGene00017628	F20B6.4	up	X
WBGene00017629	F20B6.5	up	X
WBGene00017673	F21F3.3	up	Autosome
WBGene00017782	F25E5.1	up	Autosome
WBGene00017864	pcca-1	up	X
WBGene00017951	F31E3.4	down	Autosome
WBGene00017974	vps-41	up	X
WBGene00017993	F32E10.6	down	Autosome
WBGene00018037	chtl-1	up	X
WBGene00018045	F35D11.4	down	Autosome
WBGene00018061	arrd-19	up	Autosome
WBGene00018099	ztf-28	down	Autosome
WBGene00018193	F39C12.1	up	X
WBGene00018237	F40F4.6	up	X
WBGene00018238	F40F4.7	up	X
WBGene00018259	F41B4.3	up	X
WBGene00018310	F41G4.7	up	X
WBGene00018318	F41H10.5	down	Autosome
WBGene00018386	F43C11.9	up	Autosome
WBGene00018446	F45C12.15	up	Autosome
WBGene00018516	tag-257	up	X
WBGene00018518	F46H5.2	up	X
WBGene00018520	F46H5.4	up	X
WBGene00018533	F47B7.2	up	X
WBGene00018537	F47B7.6	up	X
WBGene00018577	asna-2	up	X
WBGene00018593	F48B9.8	up	X
WBGene00018604	F48E3.3	up	X
WBGene00018634	F49E7.2	up	X
WBGene00018647	F49F1.7	up	Autosome
WBGene00018657	acl-4	up	X
WBGene00018679	F52C12.2	down	Autosome
WBGene00018698	vha-18	down	Autosome
WBGene00018701	pccb-1	up	X
WBGene00018703	sec-3	up	X
WBGene00018710	F52G3.1	up	X
WBGene00018717	F52H2.5	up	X
WBGene00018735	F53B1.2	up	X
WBGene00018740	tra-4	up	X
WBGene00018762	F53E10.6	down	Autosome
WBGene00018787	cutl-20	up	Autosome
WBGene00018837	F54G2.1	up	X
WBGene00018838	F54G2.2	up	X
WBGene00018853	sec-22	up	X
WBGene00018857	stau-1	up	X
WBGene00018878	glit-1	up	X
WBGene00018933	F56B3.9	up	Autosome
WBGene00019120	npl-4.1	down	Autosome
WBGene00019138	bath-21	up	Autosome
WBGene00019249	H28G03.1	up	X
WBGene00019250	H28G03.2	up	X
WBGene00019344	K02G10.1	up	X
WBGene00019433	acdh-3	down	Autosome
WBGene00019439	K06B9.2	down	Autosome
WBGene00019490	K07E3.1	up	X
WBGene00019511	K08A2.1	up	Autosome
WBGene00019537	K08D12.3	down	Autosome
WBGene00019554	K09C4.10	up	X
WBGene00019611	K10B3.5	up	X
WBGene00019657	K11G12.6	up	X
WBGene00019729	M02D8.3	up	X
WBGene00019733	M02E1.1	up	X
WBGene00019767	rpa-2	down	Autosome
WBGene00019768	M04F3.2	down	Autosome
WBGene00019769	M04F3.3	down	Autosome
WBGene00019828	R02E12.4	up	X
WBGene00019830	hrg-1	up	X
WBGene00019858	R03H10.6	up	Autosome
WBGene00019863	R04A9.3	up	X
WBGene00019864	R04A9.5	up	X
WBGene00019871	R04E5.8	up	X
WBGene00019872	R04E5.9	up	X
WBGene00019937	R07E4.3	up	X
WBGene00019938	R07E4.5	up	X
WBGene00019947	htz-1	down	Autosome
WBGene00019959	R08E3.3	up	X
WBGene00019987	R09F10.3	up	X
WBGene00020011	R11G1.2	up	X
WBGene00020038	R12E2.13	down	Autosome
WBGene00020142	aak-2	up	X
WBGene00020183	T03D3.5	up	Autosome
WBGene00020199	T03G11.6	up	X
WBGene00020208	T04C4.1	down	Autosome
WBGene00020216	trap-2	up	X
WBGene00020235	T05A12.4	up	Autosome
WBGene00020251	T05C1.4	up	Autosome
WBGene00020275	atp-4	down	Autosome
WBGene00020297	T07A9.9	down	Autosome
WBGene00020322	T07F12.2	up	X
WBGene00020334	atg-11	up	X
WBGene00020366	acdh-10	up	X
WBGene00020457	fbxa-67	up	Autosome
WBGene00020459	fbxa-23	up	Autosome
WBGene00020486	T13C5.6	up	X
WBGene00020496	spat-3	up	X
WBGene00020507	vha-15	up	X
WBGene00020510	T14G11.1	up	X
WBGene00020511	immt-1	up	X
WBGene00020596	oga-1	up	X
WBGene00020630	T20F7.1	up	X
WBGene00020633	aakg-2	up	X
WBGene00020729	T23E1.2	down	Autosome
WBGene00020756	T24A6.20	down	Autosome
WBGene00020757	ucr-2.3	down	Autosome
WBGene00020808	T25F10.6	down	Autosome
WBGene00020812	acdh-7	up	X
WBGene00020825	T26A8.2	down	Autosome
WBGene00020838	T27A3.1	up	Autosome
WBGene00020883	fbxa-64	up	Autosome
WBGene00020894	T28D9.1	down	Autosome
WBGene00020915	nol-5	down	Autosome
WBGene00021015	W03G9.3	down	Autosome
WBGene00021049	W05H9.2	up	X
WBGene00021051	W05H9.4	up	X
WBGene00021215	Y18H1A.11	up	Autosome
WBGene00021264	fbxa-13	up	Autosome
WBGene00021296	Y25C1A.13	up	Autosome
WBGene00021319	Y34B4A.2	up	X
WBGene00021323	Y34B4A.7	up	X
WBGene00021324	Y34B4A.8	up	X
WBGene00021471	Y39G10AR.15	down	Autosome
WBGene00021482	Y39H10A.6	up	Autosome
WBGene00021486	lbp-9	down	Autosome
WBGene00021605	Y46H3C.5	up	Autosome
WBGene00021654	Y47G7B.2	up	Autosome
WBGene00021657	Y48G1A.1	down	Autosome
WBGene00021686	Y48G8AL.5	down	Autosome
WBGene00021704	Y48G9A.11	down	Autosome
WBGene00021785	Y51H7C.7	down	Autosome
WBGene00021872	clec-85	up	Autosome
WBGene00021912	Y55B1BR.2	up	Autosome
WBGene00022010	catp-7	up	Autosome
WBGene00022042	Y65B4BR.5	down	Autosome
WBGene00022123	Y71F9AR.2	down	Autosome
WBGene00022124	Y71F9AR.3	down	Autosome
WBGene00022201	Y71H10B.1	up	X
WBGene00022206	Y73B3A.4	down	X
WBGene00022279	sesn-1	up	Autosome
WBGene00022336	Y82E9BR.3	down	Autosome
WBGene00022399	Y97E10AR.4	down	Autosome
WBGene00022501	ZC8.6	up	X
WBGene00022505	ZC21.3	down	Autosome
WBGene00022554	ZC204.2	up	Autosome
WBGene00022613	ZC449.3	up	X
WBGene00022635	ZC581.9	up	Autosome
WBGene00022647	ZK54.1	up	X
WBGene00022666	ZK154.4	up	X
WBGene00022769	ZK563.5	up	X
WBGene00022858	ZK1193.2	up	X
WBGene00023498	lin-15A	up	X
WBGene00044020	ZK856.14	up	Autosome
WBGene00044071	tag-233	up	X
WBGene00044443	ZC21.10	up	Autosome
WBGene00044495	Y54G2A.40	up	Autosome
WBGene00044637	Y47D7A.16	up	Autosome
WBGene00045401	T26F2.3	up	Autosome
WBGene00045419	lsy-12	down	Autosome
WBGene00045434	Y95D11A.3	down	Autosome
WBGene00045435	Y34B4A.11	up	X
WBGene00045495	F11C1.7	up	X
WBGene00050929	F58D12.5	up	Autosome
WBGene00050944	C14A11.9	up	X
WBGene00194679	T26C11.9	up	X

## Sheet: mes-4 vs wt EGCs
Wormbase_ID	Public_ID	change_mutant_vs_wt	X_vs_Autosome
WBGene00000003	aat-2	up	Autosome
WBGene00000004	aat-3	up	X
WBGene00000040	aco-1	up	X
WBGene00000051	acr-12	up	X
WBGene00000057	acr-18	up	Autosome
WBGene00000064	act-2	down	Autosome
WBGene00000065	act-3	down	Autosome
WBGene00000066	act-4	up	X
WBGene00000068	acy-1	up	Autosome
WBGene00000070	acy-3	up	Autosome
WBGene00000074	adm-2	up	X
WBGene00000075	adm-4	up	X
WBGene00000081	ads-1	up	Autosome
WBGene00000092	ags-3	up	X
WBGene00000095	aha-1	up	Autosome
WBGene00000100	ajm-1	up	X
WBGene00000103	akt-2	up	X
WBGene00000105	alg-1	up	X
WBGene00000106	alg-2	up	Autosome
WBGene00000112	alh-6	down	Autosome
WBGene00000120	aly-1	up	Autosome
WBGene00000137	amx-1	up	Autosome
WBGene00000140	anc-1	up	Autosome
WBGene00000144	apc-10	down	Autosome
WBGene00000157	aps-2	up	X
WBGene00000161	apa-2	up	X
WBGene00000164	apm-3	up	X
WBGene00000176	aqp-8	up	X
WBGene00000178	aqp-10	up	Autosome
WBGene00000179	aqp-11	up	Autosome
WBGene00000180	arc-1	up	Autosome
WBGene00000190	arf-1.1	up	Autosome
WBGene00000195	arr-1	up	X
WBGene00000206	asb-1	down	Autosome
WBGene00000207	asb-2	up	X
WBGene00000210	asg-2	up	X
WBGene00000221	atf-5	up	X
WBGene00000222	atf-6	up	X
WBGene00000227	atm-1	down	Autosome
WBGene00000229	atp-2	down	Autosome
WBGene00000245	bca-1	up	X
WBGene00000262	bra-1	up	X
WBGene00000266	bre-1	up	Autosome
WBGene00000276	byn-1	down	Autosome
WBGene00000277	cab-1	down	X
WBGene00000289	cam-1	up	Autosome
WBGene00000293	cap-2	up	Autosome
WBGene00000294	cas-1	up	X
WBGene00000301	cav-1	up	Autosome
WBGene00000368	ccb-1	up	Autosome
WBGene00000378	cct-2	down	Autosome
WBGene00000379	cct-4	down	Autosome
WBGene00000380	cct-5	down	Autosome
WBGene00000383	cdc-14	down	Autosome
WBGene00000386	cdc-25.1	down	Autosome
WBGene00000393	cdf-1	up	X
WBGene00000396	cdh-4	up	Autosome
WBGene00000397	cdh-5	up	Autosome
WBGene00000403	casy-1	up	Autosome
WBGene00000406	cdk-4	up	X
WBGene00000414	cec-1	up	Autosome
WBGene00000422	ced-8	up	X
WBGene00000424	ced-10	up	Autosome
WBGene00000444	ceh-21	up	X
WBGene00000460	ceh-39	up	X
WBGene00000462	ceh-41	up	X
WBGene00000474	cey-3	down	Autosome
WBGene00000475	cey-4	down	Autosome
WBGene00000479	cgh-1	down	Autosome
WBGene00000482	chd-3	up	X
WBGene00000511	ckb-1	up	Autosome
WBGene00000516	cki-1	up	Autosome
WBGene00000534	cpi-2	up	Autosome
WBGene00000535	cpi-1	up	Autosome
WBGene00000547	clp-7	down	Autosome
WBGene00000550	clu-1	down	Autosome
WBGene00000554	cnb-1	up	Autosome
WBGene00000562	cng-1	up	Autosome
WBGene00000591	coh-1	up	X
WBGene00000644	col-68	up	Autosome
WBGene00000728	col-155	up	Autosome
WBGene00000763	coq-3	down	Autosome
WBGene00000770	cpb-1	down	Autosome
WBGene00000786	cpr-6	down	X
WBGene00000792	crb-1	up	X
WBGene00000797	crn-4	up	X
WBGene00000800	cars-1	down	Autosome
WBGene00000803	csb-1	up	X
WBGene00000832	ctn-1	up	Autosome
WBGene00000833	cts-1	down	Autosome
WBGene00000841	cul-6	up	Autosome
WBGene00000870	cyd-1	up	Autosome
WBGene00000881	cyn-5	up	Autosome
WBGene00000883	cyn-7	down	Autosome
WBGene00000884	cyn-8	up	X
WBGene00000897	daf-1	up	Autosome
WBGene00000899	daf-3	up	X
WBGene00000900	daf-4	up	Autosome
WBGene00000902	daf-6	up	X
WBGene00000906	daf-10	up	Autosome
WBGene00000914	daf-19	up	Autosome
WBGene00000929	dao-3	up	X
WBGene00000931	dao-5	down	Autosome
WBGene00000935	daz-1	down	Autosome
WBGene00000959	dgk-2	up	X
WBGene00000988	dhs-25	up	X
WBGene00000992	dhs-29	up	X
WBGene00000995	die-1	up	Autosome
WBGene00001000	dim-1	up	X
WBGene00001006	dlg-1	up	X
WBGene00001008	dlk-1	up	Autosome
WBGene00001025	dnj-7	up	X
WBGene00001029	dnj-11	down	Autosome
WBGene00001032	dnj-14	up	X
WBGene00001033	dnj-15	up	Autosome
WBGene00001045	dnj-27	up	Autosome
WBGene00001075	dpy-14	up	Autosome
WBGene00001081	dpy-22	up	X
WBGene00001082	dpy-23	up	X
WBGene00001086	dpy-27	up	Autosome
WBGene00001101	dsh-1	up	Autosome
WBGene00001105	dsl-3	up	Autosome
WBGene00001113	dur-1	up	Autosome
WBGene00001130	dyn-1	up	X
WBGene00001137	eat-6	down	Autosome
WBGene00001152	ech-3	up	Autosome
WBGene00001162	efl-2	down	Autosome
WBGene00001167	eef-2	down	Autosome
WBGene00001168	eef-1A.1	down	Autosome
WBGene00001169	eef-1A.2	up	X
WBGene00001170	egl-1	up	Autosome
WBGene00001175	egl-6	up	X
WBGene00001177	egl-8	up	Autosome
WBGene00001178	egl-9	up	Autosome
WBGene00001187	egl-19	up	Autosome
WBGene00001209	egl-45	down	Autosome
WBGene00001214	ego-1	down	Autosome
WBGene00001225	eif-3.B	down	Autosome
WBGene00001226	eif-3.C	down	Autosome
WBGene00001227	eif-3.D	down	Autosome
WBGene00001228	eif-3.E	down	Autosome
WBGene00001232	eif-3.I	down	Autosome
WBGene00001234	eif-6	down	Autosome
WBGene00001240	elo-2	up	Autosome
WBGene00001244	elo-6	up	Autosome
WBGene00001249	elt-1	up	Autosome
WBGene00001263	emb-9	down	Autosome
WBGene00001325	eor-2	up	X
WBGene00001329	epn-1	up	X
WBGene00001330	eps-8	up	Autosome
WBGene00001331	erd-2	up	X
WBGene00001336	qars-1	down	Autosome
WBGene00001337	ears-1	down	Autosome
WBGene00001345	fos-1	up	Autosome
WBGene00001352	evl-14	down	Autosome
WBGene00001402	fbf-2	down	Autosome
WBGene00001423	fib-1	down	Autosome
WBGene00001425	fis-2	up	X
WBGene00001427	fkb-2	down	Autosome
WBGene00001439	fkh-7	up	Autosome
WBGene00001451	flp-8	up	X
WBGene00001452	flp-9	down	Autosome
WBGene00001479	fmo-4	up	Autosome
WBGene00001489	frm-2	up	Autosome
WBGene00001493	frm-7	up	Autosome
WBGene00001502	ftt-2	up	X
WBGene00001514	xnd-1	down	Autosome
WBGene00001516	gap-2	up	X
WBGene00001520	gas-1	up	X
WBGene00001523	gbh-2	up	Autosome
WBGene00001544	gcy-19	up	Autosome
WBGene00001553	gcy-33	up	Autosome
WBGene00001558	gdi-1	up	Autosome
WBGene00001562	lin-66	up	Autosome
WBGene00001565	gei-8	up	Autosome
WBGene00001569	gei-12	up	X
WBGene00001577	gem-4	up	Autosome
WBGene00001579	gex-2	up	Autosome
WBGene00001583	gfi-3	up	X
WBGene00001595	gld-1	down	Autosome
WBGene00001598	glh-1	down	Autosome
WBGene00001602	gln-1	up	X
WBGene00001617	glr-6	up	X
WBGene00001637	gly-12	up	X
WBGene00001638	gly-13	up	X
WBGene00001649	gob-1	up	X
WBGene00001651	gon-2	up	Autosome
WBGene00001685	gpd-3	up	X
WBGene00001694	grd-5	up	Autosome
WBGene00001708	grk-1	up	X
WBGene00001744	gars-1	down	Autosome
WBGene00001747	gsp-1	down	Autosome
WBGene00001749	gst-1	down	Autosome
WBGene00001786	gst-38	up	Autosome
WBGene00001820	ham-1	up	Autosome
WBGene00001824	hbl-1	up	X
WBGene00001830	hcp-2	down	Autosome
WBGene00001844	hid-1	up	X
WBGene00001851	hif-1	up	Autosome
WBGene00001854	hil-3	up	X
WBGene00001856	hil-5	down	Autosome
WBGene00001858	hil-7	up	Autosome
WBGene00001860	him-1	down	Autosome
WBGene00001872	him-14	down	Autosome
WBGene00001874	him-17	down	Autosome
WBGene00001898	his-24	up	X
WBGene00001909	his-35	up	Autosome
WBGene00001911	his-37	up	Autosome
WBGene00001915	his-41	up	Autosome
WBGene00001919	his-45	down	Autosome
WBGene00001922	his-48	down	Autosome
WBGene00001933	his-59	down	Autosome
WBGene00001934	his-60	down	Autosome
WBGene00001935	his-61	down	Autosome
WBGene00001936	his-62	down	Autosome
WBGene00001940	his-66	down	Autosome
WBGene00001942	his-68	down	Autosome
WBGene00001945	his-71	up	X
WBGene00001946	his-72	up	Autosome
WBGene00001958	hlh-14	up	Autosome
WBGene00001972	hmg-1.2	up	Autosome
WBGene00001973	hmg-3	down	Autosome
WBGene00001975	hmg-5	down	Autosome
WBGene00001977	hmg-12	down	Autosome
WBGene00001983	hoe-1	down	Autosome
WBGene00001994	hpk-1	up	X
WBGene00001995	hpl-1	up	X
WBGene00001998	hpr-17	down	Autosome
WBGene00002005	hsp-1	down	Autosome
WBGene00002007	hsp-3	up	X
WBGene00002008	hsp-4	down	Autosome
WBGene00002016	hsp-16.2	up	Autosome
WBGene00002018	hsp-16.41	up	Autosome
WBGene00002023	hsp-25	up	X
WBGene00002024	hsp-43	down	X
WBGene00002029	hst-2	up	X
WBGene00002031	hst-6	up	X
WBGene00002044	hyl-2	up	X
WBGene00002045	icd-1	down	Autosome
WBGene00002059	ife-1	down	Autosome
WBGene00002060	ife-2	up	X
WBGene00002061	ife-3	down	Autosome
WBGene00002063	ife-5	up	Autosome
WBGene00002064	iff-1	down	Autosome
WBGene00002065	iff-2	up	Autosome
WBGene00002077	imb-3	down	Autosome
WBGene00002079	xpo-2	down	Autosome
WBGene00002080	xpo-3	down	Autosome
WBGene00002081	ina-1	up	Autosome
WBGene00002083	inf-1	down	Autosome
WBGene00002124	inx-2	up	X
WBGene00002125	inx-3	up	X
WBGene00002143	inx-21	down	Autosome
WBGene00002152	iars-1	down	Autosome
WBGene00002153	iars-2	down	Autosome
WBGene00002175	jac-1	up	Autosome
WBGene00002187	kgb-1	up	Autosome
WBGene00002190	kin-2	up	X
WBGene00002192	kin-4	down	Autosome
WBGene00002203	kin-20	up	X
WBGene00002207	kin-25	up	X
WBGene00002213	kin-32	up	Autosome
WBGene00002215	klc-2	up	Autosome
WBGene00002220	klp-8	up	X
WBGene00002229	klp-19	down	Autosome
WBGene00002238	kars-1	down	Autosome
WBGene00002248	lam-3	up	Autosome
WBGene00002253	lbp-1	down	X
WBGene00002261	ldb-1	up	X
WBGene00002262	ldh-1	up	Autosome
WBGene00002263	lea-1	down	Autosome
WBGene00002264	lec-1	up	Autosome
WBGene00002295	let-19	up	Autosome
WBGene00002632	let-413	up	Autosome
WBGene00002717	let-526	up	Autosome
WBGene00002850	let-716	down	Autosome
WBGene00002985	lig-1	down	Autosome
WBGene00002991	lin-2	up	X
WBGene00002999	lin-10	up	Autosome
WBGene00003040	lin-59	up	Autosome
WBGene00003053	lmp-1	up	X
WBGene00003071	lrp-1	up	Autosome
WBGene00003083	lst-1	down	Autosome
WBGene00003084	lst-2	up	X
WBGene00003087	lsy-2	up	X
WBGene00003111	mab-20	up	Autosome
WBGene00003119	mac-1	down	Autosome
WBGene00003124	mai-1	up	X
WBGene00003130	map-2	down	Autosome
WBGene00003149	mbk-1	up	X
WBGene00003155	mcm-3	down	Autosome
WBGene00003157	mcm-5	down	Autosome
WBGene00003171	mec-7	up	X
WBGene00003185	mek-1	up	X
WBGene00003210	mel-28	down	Autosome
WBGene00003214	mel-32	down	Autosome
WBGene00003219	mes-1	up	X
WBGene00003235	mif-2	up	Autosome
WBGene00003239	mig-2	up	X
WBGene00003243	mig-10	up	Autosome
WBGene00003245	mig-13	up	X
WBGene00003246	mig-14	down	Autosome
WBGene00003374	mlk-1	up	Autosome
WBGene00003378	mml-1	up	Autosome
WBGene00003394	mom-1	up	X
WBGene00003407	mrp-1	up	X
WBGene00003408	mrp-2	up	X
WBGene00003409	mrp-3	up	X
WBGene00003410	mrp-4	up	X
WBGene00003411	mrp-5	up	X
WBGene00003412	mrp-6	up	X
WBGene00003413	mrp-7	down	Autosome
WBGene00003414	mrp-8	up	Autosome
WBGene00003422	msh-6	down	Autosome
WBGene00003477	mtm-5	up	X
WBGene00003482	mua-3	down	Autosome
WBGene00003497	mup-4	up	Autosome
WBGene00003499	mut-2	down	Autosome
WBGene00003504	mut-7	down	Autosome
WBGene00003517	nac-1	up	X
WBGene00003523	nas-4	up	Autosome
WBGene00003568	ncx-3	up	Autosome
WBGene00003576	ndc-80	down	Autosome
WBGene00003584	ndx-7	down	Autosome
WBGene00003596	ngp-1	down	Autosome
WBGene00003600	nhr-1	up	X
WBGene00003601	nhr-2	up	Autosome
WBGene00003609	nhr-10	up	Autosome
WBGene00003614	nhr-15	up	Autosome
WBGene00003616	nhr-17	up	X
WBGene00003621	nhr-22	up	Autosome
WBGene00003623	nhr-25	up	X
WBGene00003624	nhr-28	up	X
WBGene00003636	nhr-46	up	Autosome
WBGene00003637	nhr-47	up	Autosome
WBGene00003647	nhr-57	up	Autosome
WBGene00003651	nhr-61	up	Autosome
WBGene00003654	nhr-64	up	Autosome
WBGene00003657	nhr-67	up	Autosome
WBGene00003661	nhr-71	up	X
WBGene00003668	nhr-78	up	Autosome
WBGene00003694	nhr-104	up	Autosome
WBGene00003695	nhr-105	up	Autosome
WBGene00003722	nhr-132	up	Autosome
WBGene00003733	nhx-5	up	X
WBGene00003759	nlp-21	down	Autosome
WBGene00003794	npp-8	down	Autosome
WBGene00003813	nrf-6	up	Autosome
WBGene00003821	nst-1	down	Autosome
WBGene00003826	ntl-3	down	Autosome
WBGene00003836	nxt-1	up	Autosome
WBGene00003848	odr-1	up	X
WBGene00003883	osm-1	up	X
WBGene00003884	osm-3	up	Autosome
WBGene00003902	pab-1	down	Autosome
WBGene00003903	pab-2	up	X
WBGene00003907	paf-2	up	X
WBGene00003911	pak-1	up	X
WBGene00003912	pal-1	down	Autosome
WBGene00003914	pam-1	down	Autosome
WBGene00003915	pan-1	up	Autosome
WBGene00003920	par-5	down	Autosome
WBGene00003927	pas-6	down	Autosome
WBGene00003931	pat-4	up	Autosome
WBGene00003932	pat-6	up	Autosome
WBGene00003934	pat-10	down	Autosome
WBGene00003954	pcm-1	up	Autosome
WBGene00003963	pdi-2	up	X
WBGene00003965	pdk-1	up	X
WBGene00003970	pek-1	up	X
WBGene00003975	pen-2	up	Autosome
WBGene00003989	pfn-1	down	Autosome
WBGene00003992	pgl-1	down	Autosome
WBGene00003993	pgl-2	down	Autosome
WBGene00004035	pkd-2	up	Autosome
WBGene00004043	plk-2	down	Autosome
WBGene00004044	plk-3	down	Autosome
WBGene00004047	plx-1	down	Autosome
WBGene00004053	pme-5	up	Autosome
WBGene00004056	pmk-2	up	Autosome
WBGene00004089	ppk-3	up	X
WBGene00004093	ppw-1	down	Autosome
WBGene00004094	ppw-2	down	Autosome
WBGene00004126	pqn-39	up	X
WBGene00004130	ketn-1	up	Autosome
WBGene00004131	pqn-44	up	Autosome
WBGene00004132	pqn-45	down	Autosome
WBGene00004134	pqn-47	up	Autosome
WBGene00004136	pqn-51	up	Autosome
WBGene00004140	pqn-55	up	Autosome
WBGene00004143	pqn-59	down	Autosome
WBGene00004148	pqn-65	up	X
WBGene00004179	prg-2	down	Autosome
WBGene00004182	prk-1	up	Autosome
WBGene00004185	pro-1	down	Autosome
WBGene00004204	psa-4	up	Autosome
WBGene00004210	ptc-3	up	Autosome
WBGene00004244	puf-8	down	Autosome
WBGene00004245	puf-9	up	X
WBGene00004248	pus-1	down	Autosome
WBGene00004266	rab-1	up	Autosome
WBGene00004268	rab-5	up	Autosome
WBGene00004302	ran-1	down	Autosome
WBGene00004304	ran-3	down	Autosome
WBGene00004313	rbc-1	up	X
WBGene00004315	rbd-1	down	Autosome
WBGene00004317	rbg-1	up	X
WBGene00004321	rcn-1	up	Autosome
WBGene00004336	ret-1	up	Autosome
WBGene00004346	rgs-3	down	Autosome
WBGene00004350	rgs-7	up	X
WBGene00004354	rgs-11	up	X
WBGene00004356	rhi-1	up	X
WBGene00004377	rme-6	up	X
WBGene00004380	rnf-1	down	Autosome
WBGene00004385	rnp-2	up	Autosome
WBGene00004386	rnp-3	up	Autosome
WBGene00004392	rnr-2	up	Autosome
WBGene00004400	rom-1	up	Autosome
WBGene00004408	rla-0	down	Autosome
WBGene00004409	rla-1	down	Autosome
WBGene00004411	rpc-1	down	Autosome
WBGene00004413	rpl-2	down	Autosome
WBGene00004415	rpl-4	down	Autosome
WBGene00004416	rpl-5	down	Autosome
WBGene00004417	rpl-6	down	Autosome
WBGene00004418	rpl-7	down	Autosome
WBGene00004419	rpl-7A	down	Autosome
WBGene00004420	rpl-9	down	Autosome
WBGene00004421	rpl-10	down	Autosome
WBGene00004422	rpl-11.1	down	Autosome
WBGene00004423	rpl-11.2	up	X
WBGene00004425	rpl-13	down	Autosome
WBGene00004427	rpl-15	down	Autosome
WBGene00004429	rpl-17	down	Autosome
WBGene00004430	rpl-18	down	Autosome
WBGene00004431	rpl-19	down	Autosome
WBGene00004432	rpl-20	down	Autosome
WBGene00004433	rpl-21	down	Autosome
WBGene00004434	rpl-22	down	Autosome
WBGene00004435	rpl-23	down	Autosome
WBGene00004436	rpl-24.1	down	Autosome
WBGene00004438	rpl-25.1	up	X
WBGene00004439	rpl-25.2	down	Autosome
WBGene00004440	rpl-26	down	Autosome
WBGene00004441	rpl-27	down	Autosome
WBGene00004442	rpl-28	down	Autosome
WBGene00004444	rpl-30	down	Autosome
WBGene00004445	rpl-31	down	Autosome
WBGene00004449	rpl-35	down	Autosome
WBGene00004463	rpn-7	down	Autosome
WBGene00004469	rps-0	down	Autosome
WBGene00004470	rps-1	down	Autosome
WBGene00004471	rps-2	down	Autosome
WBGene00004472	rps-3	down	Autosome
WBGene00004473	rps-4	down	Autosome
WBGene00004474	rps-5	down	Autosome
WBGene00004475	rps-6	down	Autosome
WBGene00004476	rps-7	down	Autosome
WBGene00004477	rps-8	down	Autosome
WBGene00004478	rps-9	down	Autosome
WBGene00004479	rps-10	down	Autosome
WBGene00004482	rps-13	down	Autosome
WBGene00004483	rps-14	down	Autosome
WBGene00004484	rps-15	down	Autosome
WBGene00004485	rps-16	down	Autosome
WBGene00004487	rps-18	down	Autosome
WBGene00004488	rps-19	down	Autosome
WBGene00004489	rps-20	down	Autosome
WBGene00004491	rps-22	down	Autosome
WBGene00004492	rps-23	down	Autosome
WBGene00004504	rpt-4	down	Autosome
WBGene00004507	rpy-1	down	Autosome
WBGene00004509	rrf-2	up	Autosome
WBGene00004682	rsd-3	up	X
WBGene00004684	rsd-6	down	Autosome
WBGene00004700	rsp-3	down	Autosome
WBGene00004702	rsp-5	down	Autosome
WBGene00004727	sax-1	up	X
WBGene00004729	sax-3	up	X
WBGene00004745	sdc-1	up	X
WBGene00004746	sdc-2	up	X
WBGene00004749	sdn-1	up	X
WBGene00004758	sek-1	up	X
WBGene00004769	sel-12	up	X
WBGene00004774	sem-5	up	X
WBGene00004775	2022-09-01	down	Autosome
WBGene00004786	sex-1	up	X
WBGene00004788	sft-4	up	X
WBGene00004798	sip-1	down	Autosome
WBGene00004808	skr-2	down	Autosome
WBGene00004809	skr-3	up	Autosome
WBGene00004822	skr-16	up	Autosome
WBGene00004826	skr-20	up	X
WBGene00004829	sli-1	up	X
WBGene00004854	slt-1	up	X
WBGene00004855	sma-1	up	Autosome
WBGene00004857	sma-3	up	Autosome
WBGene00004858	sma-4	up	Autosome
WBGene00004862	sma-9	up	X
WBGene00004876	smf-1	up	X
WBGene00004880	smg-2	down	Autosome
WBGene00004889	smp-1	down	Autosome
WBGene00004893	sms-2	up	X
WBGene00004900	snf-1	up	Autosome
WBGene00004927	snx-1	up	X
WBGene00004945	sop-2	up	Autosome
WBGene00004951	spc-1	up	X
WBGene00004976	spe-41	up	Autosome
WBGene00004979	sph-1	up	Autosome
WBGene00004984	spn-4	down	Autosome
WBGene00005008	spr-3	up	X
WBGene00006063	sto-1	up	X
WBGene00006066	sto-4	up	X
WBGene00006067	sto-5	up	X
WBGene00006195	str-148	up	Autosome
WBGene00006351	sur-5	up	X
WBGene00006365	syg-1	up	X
WBGene00006368	sym-3	up	X
WBGene00006369	sym-4	up	X
WBGene00006371	syx-3	up	X
WBGene00006374	syx-4	down	Autosome
WBGene00006384	taf-3	up	X
WBGene00006393	taf-11.1	up	X
WBGene00006394	taf-11.2	up	Autosome
WBGene00006410	nck-1	up	X
WBGene00006431	tag-52	up	X
WBGene00006432	tag-53	up	X
WBGene00006439	ant-1.1	down	Autosome
WBGene00006443	pak-2	down	Autosome
WBGene00006472	tag-123	up	X
WBGene00006477	tag-130	up	X
WBGene00006479	tmbi-4	up	X
WBGene00006483	dgk-4	down	Autosome
WBGene00006489	tag-143	down	Autosome
WBGene00006493	tag-147	up	X
WBGene00006494	hke-4.2	up	X
WBGene00006495	cpna-1	up	Autosome
WBGene00006496	cgef-1	up	X
WBGene00006512	abcf-1	down	Autosome
WBGene00006517	tag-172	up	X
WBGene00006529	tba-2	down	Autosome
WBGene00006536	tbb-1	down	Autosome
WBGene00006537	tbb-2	down	Autosome
WBGene00006539	tbb-6	up	Autosome
WBGene00006543	tbx-2	up	Autosome
WBGene00006547	tbx-11	up	Autosome
WBGene00006561	tcl-2	down	Autosome
WBGene00006575	tir-1	up	Autosome
WBGene00006578	tli-1	up	Autosome
WBGene00006591	toh-1	up	Autosome
WBGene00006596	top-3	down	Autosome
WBGene00006602	tps-1	up	X
WBGene00006606	tra-3	up	Autosome
WBGene00006613	trm-1	down	Autosome
WBGene00006615	trp-2	up	Autosome
WBGene00006618	trt-1	down	Autosome
WBGene00006647	tsr-1	down	Autosome
WBGene00006714	ubc-19	up	Autosome
WBGene00006723	ubh-3	down	Autosome
WBGene00006725	ubl-1	down	Autosome
WBGene00006740	ulp-5	down	Autosome
WBGene00006742	unc-2	up	X
WBGene00006753	unc-14	up	Autosome
WBGene00006757	unc-18	up	X
WBGene00006769	unc-33	up	Autosome
WBGene00006780	unc-44	up	Autosome
WBGene00006786	unc-51	up	Autosome
WBGene00006798	unc-64	up	Autosome
WBGene00006805	unc-73	up	Autosome
WBGene00006810	unc-78	up	X
WBGene00006816	unc-84	up	X
WBGene00006822	unc-93	down	Autosome
WBGene00006826	unc-97	up	X
WBGene00006836	unc-112	up	Autosome
WBGene00006839	unc-115	up	X
WBGene00006840	unc-116	up	Autosome
WBGene00006876	vab-10	up	Autosome
WBGene00006887	vav-1	up	X
WBGene00006888	vbh-1	down	Autosome
WBGene00006890	vem-1	up	X
WBGene00006921	vha-12	up	X
WBGene00006922	vhl-1	up	X
WBGene00006923	vhp-1	up	Autosome
WBGene00006924	vig-1	down	Autosome
WBGene00006936	vars-2	down	Autosome
WBGene00006937	wah-1	down	Autosome
WBGene00006946	wars-2	down	Autosome
WBGene00006952	wrt-6	down	X
WBGene00006953	wrt-7	down	Autosome
WBGene00006959	xbp-1	up	Autosome
WBGene00006986	zip-1	up	Autosome
WBGene00006987	zmp-1	up	Autosome
WBGene00007011	mdt-1.2	up	X
WBGene00007047	wts-1	up	Autosome
WBGene00007050	tag-184	down	Autosome
WBGene00007053	tag-192	up	Autosome
WBGene00007058	dmd-6	up	Autosome
WBGene00007059	vps-52	up	X
WBGene00007068	cTel55X.1	up	X
WBGene00007091	B0001.6	up	Autosome
WBGene00007106	B0035.3	down	Autosome
WBGene00007113	B0035.15	down	Autosome
WBGene00007129	B0272.3	up	X
WBGene00007132	B0284.2	up	Autosome
WBGene00007162	fbxa-153	up	Autosome
WBGene00007170	B0393.5	down	Autosome
WBGene00007195	B0513.2	down	Autosome
WBGene00007201	exos-4.1	down	Autosome
WBGene00007225	C01G6.3	up	Autosome
WBGene00007235	C01G10.8	down	Autosome
WBGene00007236	C01G10.9	up	Autosome
WBGene00007242	C01G12.1	up	Autosome
WBGene00007257	C01H6.8	up	Autosome
WBGene00007260	olrn-1	up	X
WBGene00007267	C03A3.2	up	X
WBGene00007277	asfl-1	down	Autosome
WBGene00007284	C03H12.1	up	X
WBGene00007286	C04A11.2	up	X
WBGene00007287	gck-4	up	X
WBGene00007290	C04B4.2	up	X
WBGene00007297	C04F12.1	up	Autosome
WBGene00007303	rnh-1.3	up	Autosome
WBGene00007307	C04G2.8	up	Autosome
WBGene00007330	C05C10.3	down	Autosome
WBGene00007348	C05G5.2	up	X
WBGene00007349	C05G5.3	up	X
WBGene00007350	C05G5.4	up	X
WBGene00007352	cdc-48.1	down	Autosome
WBGene00007372	C06B8.7	up	Autosome
WBGene00007388	folt-1	up	Autosome
WBGene00007442	C08E8.6	up	Autosome
WBGene00007455	ugt-22	up	Autosome
WBGene00007486	C09G1.4	up	X
WBGene00007513	wht-2	down	Autosome
WBGene00007520	C11E4.6	up	X
WBGene00007524	C11G6.3	up	X
WBGene00007528	C11H1.2	up	X
WBGene00007529	C11H1.3	up	X
WBGene00007548	C13C4.4	up	Autosome
WBGene00007574	C14B1.3	up	Autosome
WBGene00007585	C14C10.2	up	Autosome
WBGene00007587	C14C10.4	down	Autosome
WBGene00007614	gnrr-2	up	Autosome
WBGene00007624	C16C10.3	down	Autosome
WBGene00007635	C16D6.2	up	X
WBGene00007645	C17E4.6	down	Autosome
WBGene00007651	nra-3	up	X
WBGene00007666	C18B12.4	up	X
WBGene00007668	C18B12.6	up	X
WBGene00007672	fbxa-136	up	Autosome
WBGene00007675	C18D4.6	up	Autosome
WBGene00007690	C18E9.10	up	Autosome
WBGene00007698	qns-1	down	Autosome
WBGene00007720	C25D7.10	up	Autosome
WBGene00007734	C25G4.7	up	Autosome
WBGene00007736	C25G4.10	up	Autosome
WBGene00007750	syg-2	up	X
WBGene00007766	C27C7.1	up	Autosome
WBGene00007773	C27C12.3	up	X
WBGene00007774	C27C12.4	up	X
WBGene00007784	ruvb-1	down	Autosome
WBGene00007785	C27H6.3	down	Autosome
WBGene00007787	C27H6.8	down	Autosome
WBGene00007812	C29F7.3	up	X
WBGene00007836	C31C9.2	up	Autosome
WBGene00007846	C31E10.5	up	X
WBGene00007847	C31E10.6	up	X
WBGene00007848	C31E10.7	up	X
WBGene00007849	tbc-19	up	X
WBGene00007886	C33A12.7	up	Autosome
WBGene00007892	C33B4.4	up	Autosome
WBGene00007900	C33D9.6	up	Autosome
WBGene00007910	C34B4.5	up	Autosome
WBGene00007924	C34C12.5	up	Autosome
WBGene00007941	C34F6.7	up	X
WBGene00007942	idh-2	up	X
WBGene00007943	C34F6.9	up	X
WBGene00007953	hdac-11	up	Autosome
WBGene00007955	C35C5.3	up	X
WBGene00007956	C35C5.6	up	X
WBGene00007966	C36A4.5	down	Autosome
WBGene00007976	C36B1.9	up	Autosome
WBGene00007980	C36E8.1	down	Autosome
WBGene00007982	pxd-1	up	Autosome
WBGene00007984	irx-1	up	Autosome
WBGene00007993	C37E2.1	up	X
WBGene00008003	C38D4.1	down	Autosome
WBGene00008010	C38D9.2	up	Autosome
WBGene00008085	C44C10.4	up	X
WBGene00008094	C44H4.4	up	X
WBGene00008099	C44H9.4	up	Autosome
WBGene00008110	C46C2.2	up	Autosome
WBGene00008117	gsr-1	down	Autosome
WBGene00008195	C49C3.5	up	Autosome
WBGene00008198	C49C3.8	up	Autosome
WBGene00008207	C49F5.3	up	X
WBGene00008210	C49F5.6	up	X
WBGene00008224	C50B8.1	down	Autosome
WBGene00008267	C53A5.9	up	Autosome
WBGene00008301	dct-3	up	Autosome
WBGene00008302	C54D10.8	up	Autosome
WBGene00008348	C56G7.3	up	Autosome
WBGene00008353	D1025.1	up	X
WBGene00008405	ttll-12	down	Autosome
WBGene00008418	D2030.8	down	Autosome
WBGene00008419	wdr-23	up	Autosome
WBGene00008434	D2089.3	up	Autosome
WBGene00008480	E04D5.1	down	Autosome
WBGene00008502	F01G4.3	down	Autosome
WBGene00008505	F01G4.6	down	Autosome
WBGene00008549	din-1	up	Autosome
WBGene00008563	F07H5.13	up	Autosome
WBGene00008576	F08G2.4	up	Autosome
WBGene00008581	acl-13	up	Autosome
WBGene00008585	F08G12.1	up	X
WBGene00008586	F08G12.2	up	X
WBGene00008587	F08G12.3	up	X
WBGene00008592	F08H9.4	up	Autosome
WBGene00008606	dhhc-1	up	X
WBGene00008615	F09C6.1	up	Autosome
WBGene00008622	F09C8.2	up	X
WBGene00008688	F11A10.7	down	Autosome
WBGene00008690	F11C1.1	up	X
WBGene00008691	mff-1	up	X
WBGene00008694	F11C1.5	up	X
WBGene00008729	F13B12.1	down	Autosome
WBGene00008740	F13D12.5	down	Autosome
WBGene00008745	F13E6.1	up	X
WBGene00008747	F13E6.3	up	X
WBGene00008749	F13E6.5	up	X
WBGene00008779	F14B4.1	up	Autosome
WBGene00008781	F14B4.3	down	Autosome
WBGene00008803	lips-10	down	Autosome
WBGene00008805	git-1	up	X
WBGene00008806	mboa-7	up	X
WBGene00008862	F15D4.5	up	Autosome
WBGene00008863	F15D4.6	up	Autosome
WBGene00008880	F16B12.4	up	X
WBGene00008882	F16B12.6	up	X
WBGene00008915	F17C11.4	up	Autosome
WBGene00008920	eef-1G	down	Autosome
WBGene00008922	F17C11.11	up	Autosome
WBGene00008924	F17E5.2	up	X
WBGene00008927	F17H10.3	up	X
WBGene00008939	F18H3.1	up	X
WBGene00008940	F18H3.4	up	X
WBGene00008948	F19B6.1	down	Autosome
WBGene00008951	F19C6.2	up	X
WBGene00008958	F19H6.3	up	X
WBGene00008970	F20C5.5	up	Autosome
WBGene00008971	F20C5.6	up	Autosome
WBGene00008973	F20D1.1	up	X
WBGene00008974	tbc-1	up	X
WBGene00008975	F20D1.3	up	X
WBGene00008976	plp-2	up	X
WBGene00008977	F20D1.7	up	X
WBGene00008979	F20D1.9	up	X
WBGene00008980	tag-299	up	X
WBGene00008986	F20G2.2	up	Autosome
WBGene00008995	F21A3.5	down	Autosome
WBGene00008999	F21A10.2	up	X
WBGene00009004	pfd-6	down	Autosome
WBGene00009027	F21G4.6	up	X
WBGene00009044	F22B5.6	up	Autosome
WBGene00009069	F23A7.4	down	X
WBGene00009113	F25D7.4	down	Autosome
WBGene00009116	F25H2.2	up	Autosome
WBGene00009119	F25H2.5	down	Autosome
WBGene00009122	tct-1	down	Autosome
WBGene00009124	rtel-1	down	Autosome
WBGene00009135	F25H9.2	up	Autosome
WBGene00009137	bath-39	up	Autosome
WBGene00009138	F25H9.6	down	Autosome
WBGene00009144	del-3	up	Autosome
WBGene00009162	F26E4.7	up	Autosome
WBGene00009178	F26H9.8	up	Autosome
WBGene00009182	F26H11.4	down	Autosome
WBGene00009201	F28C1.3	up	Autosome
WBGene00009211	F28D1.1	down	Autosome
WBGene00009212	F28D1.2	up	Autosome
WBGene00009218	acs-20	up	Autosome
WBGene00009225	fbxa-94	up	Autosome
WBGene00009233	F28H6.4	up	X
WBGene00009267	usp-48	down	Autosome
WBGene00009280	F31B9.3	up	X
WBGene00009299	F31E9.6	up	Autosome
WBGene00009301	F31F6.2	up	X
WBGene00009318	F32B4.8	down	Autosome
WBGene00009319	F32B6.2	down	Autosome
WBGene00009353	sdhd-1	up	Autosome
WBGene00009374	F34D10.4	down	Autosome
WBGene00009394	clec-63	down	Autosome
WBGene00009500	F36H2.3	up	Autosome
WBGene00009534	F38B7.3	up	Autosome
WBGene00009552	piki-1	up	X
WBGene00009559	mtx-1	down	Autosome
WBGene00009572	F40D4.13	up	Autosome
WBGene00009574	F40E10.6	up	X
WBGene00009575	F40F8.1	up	Autosome
WBGene00009587	F40F11.2	up	Autosome
WBGene00009603	srt-33	up	Autosome
WBGene00009635	F42F12.3	up	X
WBGene00009668	cfim-1	down	Autosome
WBGene00009674	nucb-1	up	X
WBGene00009678	F44D12.1	up	Autosome
WBGene00009691	F44E5.4	up	Autosome
WBGene00009692	F44E5.5	up	Autosome
WBGene00009713	F44G4.3	down	Autosome
WBGene00009726	tbc-13	up	X
WBGene00009730	F45G2.2	up	Autosome
WBGene00009732	F45G2.4	up	Autosome
WBGene00009743	sptf-1	up	Autosome
WBGene00009793	pkn-1	up	X
WBGene00009801	F47A4.5	up	X
WBGene00009804	F47B8.3	up	Autosome
WBGene00009812	F47B10.1	up	X
WBGene00009825	F47G4.4	up	Autosome
WBGene00009851	F48F7.6	up	X
WBGene00009882	vha-17	up	Autosome
WBGene00009886	F49E2.2	up	X
WBGene00009888	F49E2.5	up	X
WBGene00009899	F49E12.6	up	Autosome
WBGene00009918	F52A8.5	down	Autosome
WBGene00009923	F52B5.7	up	Autosome
WBGene00009930	F52D10.2	up	X
WBGene00009939	ztf-11	up	Autosome
WBGene00009940	F52F12.7	up	Autosome
WBGene00009945	bath-38	up	Autosome
WBGene00009957	F53B2.8	up	Autosome
WBGene00009962	F53B6.7	down	Autosome
WBGene00009973	F53C11.3	up	Autosome
WBGene00009976	swan-2	up	Autosome
WBGene00009977	swan-1	up	Autosome
WBGene00009988	F53F4.4	up	Autosome
WBGene00010009	F53H4.4	up	X
WBGene00010011	F53H4.6	up	X
WBGene00010015	atad-3	down	Autosome
WBGene00010031	F54B11.8	up	X
WBGene00010036	cpar-1	up	Autosome
WBGene00010042	bcs-1	down	Autosome
WBGene00010051	F54D5.5	up	Autosome
WBGene00010053	F54D5.9	down	Autosome
WBGene00010066	F54F7.6	up	X
WBGene00010075	F55A11.1	up	Autosome
WBGene00010100	F55C9.3	up	Autosome
WBGene00010102	F55C9.5	up	Autosome
WBGene00010177	F57A8.1	up	Autosome
WBGene00010199	bet-2	up	X
WBGene00010204	F57F5.1	up	Autosome
WBGene00010212	fbxa-192	up	Autosome
WBGene00010227	F58A4.2	down	Autosome
WBGene00010234	ttr-50	up	Autosome
WBGene00010269	F58G1.7	up	Autosome
WBGene00010282	F58G11.4	up	Autosome
WBGene00010291	F58H10.1	up	Autosome
WBGene00010303	cri-3	down	Autosome
WBGene00010310	F59B2.8	up	Autosome
WBGene00010314	F59B2.12	up	Autosome
WBGene00010327	F59C6.8	up	Autosome
WBGene00010332	F59D12.5	up	X
WBGene00010337	F59F4.2	up	X
WBGene00010338	F59F4.3	up	X
WBGene00010339	acl-1	up	X
WBGene00010351	cbd-1	down	Autosome
WBGene00010365	H04D03.4	up	Autosome
WBGene00010397	H13N06.4	up	X
WBGene00010405	H19N07.1	down	Autosome
WBGene00010419	H28O16.1	down	Autosome
WBGene00010428	dcn-1	up	Autosome
WBGene00010433	H40L08.1	up	X
WBGene00010434	H40L08.3	up	X
WBGene00010435	JC8.2	down	Autosome
WBGene00010465	K01D12.6	down	Autosome
WBGene00010470	cdr-4	up	Autosome
WBGene00010478	K01G5.5	down	Autosome
WBGene00010492	meg-1	up	X
WBGene00010493	meg-2	up	X
WBGene00010507	K02E2.6	up	Autosome
WBGene00010550	K04B12.2	up	Autosome
WBGene00010551	smg-8	down	Autosome
WBGene00010552	K04C1.2	up	X
WBGene00010553	K04C1.3	up	X
WBGene00010556	rack-1	down	Autosome
WBGene00010568	K04G2.10	up	Autosome
WBGene00010572	wdr-5.2	up	X
WBGene00010582	K05C4.5	down	Autosome
WBGene00010610	K07A1.3	up	Autosome
WBGene00010627	K07C5.4	down	Autosome
WBGene00010638	K07F5.14	down	Autosome
WBGene00010645	K07G5.6	down	Autosome
WBGene00010677	K08F4.2	down	Autosome
WBGene00010678	K08F4.3	down	Autosome
WBGene00010691	K08H2.4	up	X
WBGene00010695	K08H10.2	down	Autosome
WBGene00010699	K08H10.9	up	Autosome
WBGene00010700	nipi-3	up	X
WBGene00010701	ent-2	up	X
WBGene00010702	usp-33	up	X
WBGene00010704	K09A11.1	up	X
WBGene00010724	K09E9.1	up	X
WBGene00010725	erv-46	up	X
WBGene00010726	K09E9.3	up	X
WBGene00010756	K10G9.2	down	Autosome
WBGene00010757	pad-2	up	Autosome
WBGene00010776	pix-1	up	X
WBGene00010785	top-2	down	Autosome
WBGene00010793	LLC1.2	up	Autosome
WBGene00010803	M01B2.10	up	Autosome
WBGene00010896	M28.5	down	Autosome
WBGene00010909	M88.7	down	Autosome
WBGene00010912	M106.4	down	Autosome
WBGene00010920	M117.4	up	Autosome
WBGene00010934	fbxa-118	up	Autosome
WBGene00010935	M163.1	up	X
WBGene00010951	M199.2	up	Autosome
WBGene00010981	R03A10.1	up	X
WBGene00010983	R03A10.3	up	X
WBGene00010984	nkat-3	up	X
WBGene00010988	R03D7.1	down	Autosome
WBGene00010993	R03E1.2	up	X
WBGene00011037	R05D11.9	down	Autosome
WBGene00011038	R05H5.3	down	Autosome
WBGene00011054	arrd-13	down	Autosome
WBGene00011059	R06C1.4	up	Autosome
WBGene00011061	R06C7.1	down	Autosome
WBGene00011092	R07B7.8	up	Autosome
WBGene00011101	R07D5.2	up	X
WBGene00011117	R07E5.11	down	Autosome
WBGene00011139	R08B4.3	up	X
WBGene00011152	R09A8.1	up	X
WBGene00011153	R09A8.2	up	X
WBGene00011155	R09B3.2	down	Autosome
WBGene00011156	R09B3.3	down	Autosome
WBGene00011199	tag-310	up	Autosome
WBGene00011231	R11A5.3	up	Autosome
WBGene00011235	R11A5.7	up	Autosome
WBGene00011236	R11A8.1	up	Autosome
WBGene00011238	ugt-59	down	Autosome
WBGene00011242	R11D1.1	down	Autosome
WBGene00011259	miz-1	up	Autosome
WBGene00011291	R102.4	up	Autosome
WBGene00011304	mnk-1	up	Autosome
WBGene00011320	T01C3.3	down	Autosome
WBGene00011376	gla-3	down	Autosome
WBGene00011408	T04A8.6	down	Autosome
WBGene00011435	T04D3.8	down	Autosome
WBGene00011436	T04F3.1	up	Autosome
WBGene00011440	sfxn-1.5	up	X
WBGene00011441	T04F8.2	up	X
WBGene00011444	T04F8.6	up	X
WBGene00011446	T04F8.8	up	X
WBGene00011498	T05G5.1	up	Autosome
WBGene00011531	rsbp-1	up	Autosome
WBGene00011560	T07C4.3	down	Autosome
WBGene00011572	T07C12.8	down	Autosome
WBGene00011580	ddx-19	down	Autosome
WBGene00011614	nfya-1	up	X
WBGene00011615	lsd-1	up	X
WBGene00011624	T08G5.3	up	Autosome
WBGene00011634	T09A5.5	down	Autosome
WBGene00011636	T09A5.8	down	Autosome
WBGene00011645	T09B9.4	up	X
WBGene00011661	ztf-27	up	Autosome
WBGene00011679	ucr-2.2	up	X
WBGene00011680	T10B10.3	up	X
WBGene00011717	T11G6.2	up	Autosome
WBGene00011737	T12G3.1	up	Autosome
WBGene00011738	T12G3.2	up	Autosome
WBGene00011759	T13H5.5	down	Autosome
WBGene00011760	T13H5.6	up	Autosome
WBGene00011771	T14G8.3	up	X
WBGene00011793	T16A9.3	up	Autosome
WBGene00011802	T16G1.9	up	Autosome
WBGene00011805	T16G12.4	up	Autosome
WBGene00011820	T18D3.1	up	X
WBGene00011833	T19B10.5	up	Autosome
WBGene00011839	T19C4.5	up	Autosome
WBGene00011849	T19H5.4	up	Autosome
WBGene00011864	T20F10.2	up	Autosome
WBGene00011909	T22A3.6	up	Autosome
WBGene00011924	T22C8.3	up	Autosome
WBGene00011935	scrm-1	up	Autosome
WBGene00011939	prmt-3	down	Autosome
WBGene00011945	T23D8.7	down	Autosome
WBGene00011977	T24B8.3	up	Autosome
WBGene00011990	T24D5.2	up	X
WBGene00011995	T24F1.3	up	Autosome
WBGene00012005	2022-06-01	up	Autosome
WBGene00012058	T26F2.2	up	Autosome
WBGene00012095	pssy-2	down	Autosome
WBGene00012100	T27F2.2	up	Autosome
WBGene00012103	clec-12	up	Autosome
WBGene00012104	T27F6.4	down	Autosome
WBGene00012110	T28A8.4	down	Autosome
WBGene00012117	T28B11.1	up	Autosome
WBGene00012121	T28C6.7	up	Autosome
WBGene00012136	T28F4.1	up	Autosome
WBGene00012155	VW02B12L.2	up	Autosome
WBGene00012158	ucr-2.1	up	X
WBGene00012193	vps-25	up	Autosome
WBGene00012198	W02B8.2	up	Autosome
WBGene00012234	W04A4.5	down	Autosome
WBGene00012239	W04A8.4	up	Autosome
WBGene00012253	clec-50	up	Autosome
WBGene00012255	lpr-6	down	X
WBGene00012257	lpr-4	down	X
WBGene00012258	W04G3.5	up	X
WBGene00012268	W04G5.8	up	Autosome
WBGene00012295	W06B3.1	up	X
WBGene00012299	W06D11.1	up	X
WBGene00012315	immt-2	down	Autosome
WBGene00012326	W07E11.1	up	X
WBGene00012343	W08E3.2	up	Autosome
WBGene00012352	dkf-1	up	Autosome
WBGene00012354	W09C5.8	down	Autosome
WBGene00012375	mecr-1	down	Autosome
WBGene00012407	Y7A5A.1	up	X
WBGene00012420	Y7A9D.1	up	Autosome
WBGene00012436	flh-3	up	Autosome
WBGene00012484	car-1	down	Autosome
WBGene00012512	ekl-5	up	X
WBGene00012513	Y26E6A.2	up	X
WBGene00012522	Y32B12B.2	down	Autosome
WBGene00012544	Y37D8A.2	down	Autosome
WBGene00012566	fbxa-211	down	Autosome
WBGene00012608	Y38F1A.6	up	Autosome
WBGene00012648	Y39A1A.9	up	Autosome
WBGene00012652	Y39A1A.14	down	Autosome
WBGene00012660	Y39A1A.24	up	Autosome
WBGene00012666	Y39B6A.3	up	Autosome
WBGene00012714	abce-1	down	Autosome
WBGene00012717	Y39E4B.6	up	Autosome
WBGene00012718	Y39E4B.7	down	Autosome
WBGene00012722	Y39G8B.1	up	Autosome
WBGene00012723	Y39G8B.2	up	Autosome
WBGene00012768	eef-1B.2	down	Autosome
WBGene00012807	Y43F4B.10	up	Autosome
WBGene00012813	Y43F8B.2	up	Autosome
WBGene00012828	Y43F8C.6	up	Autosome
WBGene00012855	Y44A6D.5	up	Autosome
WBGene00012889	Y45F10D.10	up	Autosome
WBGene00012897	pisy-1	up	Autosome
WBGene00012899	Y46G5A.7	up	Autosome
WBGene00012923	fbxa-128	up	Autosome
WBGene00012936	Y47D3A.29	down	Autosome
WBGene00012966	exos-1	down	Autosome
WBGene00012980	Y48B6A.6	up	Autosome
WBGene00013027	Y49A3A.4	up	Autosome
WBGene00013030	Y49E10.4	down	Autosome
WBGene00013137	Y53C10A.6	down	Autosome
WBGene00013193	Y54E2A.8	down	Autosome
WBGene00013217	ddl-3	down	Autosome
WBGene00013223	efa-6	down	Autosome
WBGene00013243	Y56A3A.31	down	Autosome
WBGene00013247	Y57A10A.2	down	Autosome
WBGene00013249	Y57A10A.4	down	Autosome
WBGene00013302	vti-1	up	Autosome
WBGene00013327	Y57G11C.38	up	Autosome
WBGene00013349	Y59A8B.12	down	Autosome
WBGene00013370	Y60A9.3	up	X
WBGene00013416	Y64G10A.7	up	Autosome
WBGene00013418	Y65A5A.1	up	Autosome
WBGene00013431	Y66D12A.5	down	Autosome
WBGene00013442	Y66D12A.16	down	Autosome
WBGene00013443	such-1	down	Autosome
WBGene00013453	fbxa-83	up	Autosome
WBGene00013462	Y67H2A.4	down	Autosome
WBGene00013509	Y71A12B.12	up	Autosome
WBGene00013522	Y73F8A.13	up	Autosome
WBGene00013530	Y73F8A.25	down	Autosome
WBGene00013551	Y75B8A.16	down	Autosome
WBGene00013623	fbxa-90	up	Autosome
WBGene00013632	Y105C5A.1	up	Autosome
WBGene00013639	Y105C5A.15	up	Autosome
WBGene00013658	Y105C5B.19	up	Autosome
WBGene00013659	Y105C5B.20	up	Autosome
WBGene00013680	Y105E8A.23	down	Autosome
WBGene00013683	zoo-1	up	Autosome
WBGene00013708	Y106G6E.4	up	Autosome
WBGene00013755	fbxa-115	up	Autosome
WBGene00013757	fbxa-113	down	Autosome
WBGene00013766	prmt-1	down	Autosome
WBGene00013847	cls-3	up	Autosome
WBGene00013876	ZC376.4	up	Autosome
WBGene00013880	mppb-1	down	Autosome
WBGene00013894	ZC434.8	down	Autosome
WBGene00013917	ZC504.3	up	X
WBGene00013919	ZC506.1	up	X
WBGene00013920	pssy-1	up	X
WBGene00013924	rad-23	down	Autosome
WBGene00013969	tep-1	up	Autosome
WBGene00013982	ZK512.1	up	Autosome
WBGene00013997	ZK550.3	down	Autosome
WBGene00014014	ZK632.5	down	Autosome
WBGene00014031	ZK637.14	up	Autosome
WBGene00014078	ZK792.5	down	Autosome
WBGene00014080	atg-4.2	up	Autosome
WBGene00014095	ZK829.4	down	Autosome
WBGene00014117	clec-91	down	Autosome
WBGene00014120	ZK858.7	down	Autosome
WBGene00014165	puf-12	down	Autosome
WBGene00014209	ZK1067.3	down	Autosome
WBGene00014213	ZK1073.1	up	X
WBGene00014259	ZK1320.11	up	Autosome
WBGene00014999	AH9.3	up	X
WBGene00015002	B0034.1	up	Autosome
WBGene00015008	B0041.3	up	Autosome
WBGene00015021	B0205.6	down	Autosome
WBGene00015023	B0205.9	down	Autosome
WBGene00015102	cpg-2	down	Autosome
WBGene00015106	B0280.11	up	Autosome
WBGene00015128	B0303.7	up	Autosome
WBGene00015134	B0304.2	down	Autosome
WBGene00015161	pho-5	down	Autosome
WBGene00015168	tag-320	up	X
WBGene00015172	B0410.3	up	X
WBGene00015180	B0416.4	up	X
WBGene00015181	B0416.5	up	X
WBGene00015184	djr-1.1	down	Autosome
WBGene00015197	B0454.6	up	Autosome
WBGene00015200	B0454.9	up	Autosome
WBGene00015219	B0507.2	up	Autosome
WBGene00015225	B0507.8	up	Autosome
WBGene00015227	B0507.10	up	Autosome
WBGene00015285	C01B12.2	up	Autosome
WBGene00015324	C02B8.6	up	X
WBGene00015326	ivd-1	down	Autosome
WBGene00015344	nra-4	up	Autosome
WBGene00015357	C02F12.8	up	X
WBGene00015372	C03B1.1	up	X
WBGene00015378	C03B1.7	up	X
WBGene00015391	sdha-1	up	X
WBGene00015410	tbc-6	up	Autosome
WBGene00015413	C04C3.3	down	Autosome
WBGene00015425	C04E6.11	down	Autosome
WBGene00015429	sor-3	up	X
WBGene00015431	C04E7.4	up	X
WBGene00015461	C05C8.2	down	Autosome
WBGene00015469	C05D2.8	up	Autosome
WBGene00015483	C05D11.5	up	Autosome
WBGene00015485	C05D11.8	up	Autosome
WBGene00015486	C05D11.9	down	Autosome
WBGene00015492	lnp-1	up	X
WBGene00015507	C06A6.2	up	Autosome
WBGene00015512	C06A8.1	down	Autosome
WBGene00015538	sams-3	down	Autosome
WBGene00015547	ain-1	up	X
WBGene00015551	C06G3.5	up	Autosome
WBGene00015552	C06G3.6	up	Autosome
WBGene00015561	C07A12.7	up	X
WBGene00015565	C07D8.6	up	X
WBGene00015591	C08C3.4	down	Autosome
WBGene00015641	C09E7.7	down	Autosome
WBGene00015662	C10A4.1	up	X
WBGene00015668	C10A4.7	up	X
WBGene00015676	C10E2.6	up	X
WBGene00015678	C10F3.4	up	Autosome
WBGene00015680	egal-1	up	Autosome
WBGene00015777	sfxn-2	up	X
WBGene00015778	C14F11.1	up	X
WBGene00015787	C15B12.6	up	X
WBGene00015789	syx-6	up	X
WBGene00015791	C15C7.5	up	X
WBGene00015792	C15C7.6	up	X
WBGene00015801	C15H9.5	up	X
WBGene00015814	C16A3.10	down	Autosome
WBGene00015822	C16B8.2	down	X
WBGene00015836	math-7	up	Autosome
WBGene00015866	C16E9.2	up	X
WBGene00015868	C16H3.3	up	X
WBGene00015885	fbxa-65	up	Autosome
WBGene00015899	C17E7.4	up	Autosome
WBGene00015903	C17E7.9	up	Autosome
WBGene00015905	C17E7.12	up	Autosome
WBGene00015910	C17F4.2	up	Autosome
WBGene00015912	fbxc-50	up	Autosome
WBGene00015918	C17G10.6	up	Autosome
WBGene00015922	C17H11.2	up	X
WBGene00015938	C17H12.13	down	Autosome
WBGene00015955	C18B2.4	up	X
WBGene00015972	C18E3.3	up	Autosome
WBGene00015974	C18E3.5	down	Autosome
WBGene00016006	fln-2	up	X
WBGene00016009	C23F12.4	up	X
WBGene00016010	C23G10.1	up	Autosome
WBGene00016061	C24G6.6	up	Autosome
WBGene00016068	C24H10.2	up	X
WBGene00016072	C24H12.2	up	Autosome
WBGene00016073	C24H12.4	down	Autosome
WBGene00016087	C25A11.2	up	X
WBGene00016102	C25F6.1	up	X
WBGene00016117	C25H3.8	down	Autosome
WBGene00016131	C26B9.1	up	X
WBGene00016138	flh-2	up	Autosome
WBGene00016163	C27D9.1	down	Autosome
WBGene00016178	mesp-1	down	Autosome
WBGene00016182	C28C12.12	down	Autosome
WBGene00016188	sec-15	up	X
WBGene00016190	C28G1.5	up	X
WBGene00016191	C28G1.6	up	X
WBGene00016266	C30F12.7	up	Autosome
WBGene00016272	C30G4.7	up	X
WBGene00016316	C32D5.8	up	Autosome
WBGene00016333	C32F10.8	down	Autosome
WBGene00016346	fbxa-120	up	X
WBGene00016350	C33E10.10	up	X
WBGene00016354	rig-6	down	Autosome
WBGene00016355	lact-5	up	Autosome
WBGene00016406	C34D10.1	up	X
WBGene00016415	C34F11.3	up	Autosome
WBGene00016438	C35B8.3	up	X
WBGene00016469	C36B7.6	up	X
WBGene00016485	C36C9.1	up	X
WBGene00016486	fbxa-170	up	X
WBGene00016489	C36E6.1	up	X
WBGene00016490	C36E6.2	up	X
WBGene00016507	C37H5.3	up	Autosome
WBGene00016509	C37H5.6	down	Autosome
WBGene00016511	C37H5.13	up	Autosome
WBGene00016520	C39B5.2	up	Autosome
WBGene00016551	C40A11.8	up	Autosome
WBGene00016558	C41A3.1	up	X
WBGene00016573	C41H7.3	up	Autosome
WBGene00016574	C41H7.4	up	Autosome
WBGene00016575	C41H7.5	up	Autosome
WBGene00016576	C41H7.6	up	Autosome
WBGene00016586	C42C1.8	down	Autosome
WBGene00016592	erl-1	down	Autosome
WBGene00016611	bicd-1	up	Autosome
WBGene00016614	C43H6.1	up	X
WBGene00016616	C43H6.3	up	X
WBGene00016617	C43H6.4	up	X
WBGene00016620	C43H6.7	up	X
WBGene00016631	C44B7.11	up	Autosome
WBGene00016639	C44B12.6	up	Autosome
WBGene00016642	C44C1.2	up	X
WBGene00016643	vps-45	up	X
WBGene00016652	C44E4.3	down	Autosome
WBGene00016656	C44E4.7	up	Autosome
WBGene00016661	C45B2.6	up	X
WBGene00016698	C46A5.1	up	Autosome
WBGene00016704	C46C11.1	up	X
WBGene00016710	fbxc-52	up	Autosome
WBGene00016716	acs-17	up	X
WBGene00016737	C47C12.4	up	X
WBGene00016739	C48A7.2	down	Autosome
WBGene00016790	C49H3.3	down	Autosome
WBGene00016799	C50C3.1	down	Autosome
WBGene00016816	C50E3.5	down	Autosome
WBGene00016866	coel-1	up	X
WBGene00016867	C52B9.4	up	X
WBGene00016868	C52B9.8	up	X
WBGene00016879	C52D10.12	up	Autosome
WBGene00016905	ztf-3	up	Autosome
WBGene00016906	C53D5.5	up	Autosome
WBGene00016907	C53H9.2	down	Autosome
WBGene00016934	mboa-3	up	X
WBGene00016935	ifta-1	up	X
WBGene00016937	tag-294	up	X
WBGene00016945	sulp-1	up	Autosome
WBGene00016968	epg-5	up	Autosome
WBGene00016984	C56G3.1	up	X
WBGene00016992	CD4.7	down	Autosome
WBGene00016995	D1005.1	up	X
WBGene00016997	D1005.3	up	X
WBGene00017010	D1007.15	up	Autosome
WBGene00017023	D1022.4	up	Autosome
WBGene00017046	utx-1	up	X
WBGene00017072	D2096.5	up	Autosome
WBGene00017075	D2096.8	down	Autosome
WBGene00017098	E02D9.1	down	Autosome
WBGene00017101	E02H9.3	up	Autosome
WBGene00017133	EEED8.2	up	Autosome
WBGene00017147	EGAP2.1	up	Autosome
WBGene00017157	tyra-2	up	X
WBGene00017163	F01F1.9	down	Autosome
WBGene00017177	F02E8.4	up	X
WBGene00017178	atg-16.1	up	X
WBGene00017241	F08C6.2	up	X
WBGene00017244	apy-1	up	X
WBGene00017259	F08F1.9	up	X
WBGene00017280	F09D1.1	down	Autosome
WBGene00017296	F09E10.6	up	X
WBGene00017298	toca-1	up	X
WBGene00017300	F09F7.3	down	Autosome
WBGene00017301	F09F7.4	down	Autosome
WBGene00017310	F09G2.1	up	Autosome
WBGene00017313	cpsf-2	down	Autosome
WBGene00017342	F10D7.5	up	X
WBGene00017348	F10E7.6	down	Autosome
WBGene00017373	F10G7.10	up	Autosome
WBGene00017400	stg-2	up	X
WBGene00017419	F13B9.1	up	X
WBGene00017422	F13C5.1	up	X
WBGene00017423	F13C5.2	up	X
WBGene00017445	F14B8.2	up	X
WBGene00017472	cst-1	up	X
WBGene00017504	F16B4.2	up	Autosome
WBGene00017507	F16B4.5	up	Autosome
WBGene00017532	F16H11.3	up	X
WBGene00017549	F18A1.8	down	Autosome
WBGene00017563	F18C5.10	up	Autosome
WBGene00017571	tag-279	up	X
WBGene00017582	F18G5.6	up	X
WBGene00017584	F19B10.2	up	Autosome
WBGene00017586	F19B10.4	up	Autosome
WBGene00017587	F19B10.5	up	Autosome
WBGene00017589	F19B10.10	up	Autosome
WBGene00017606	F19F10.10	down	Autosome
WBGene00017620	F20A1.9	down	Autosome
WBGene00017627	F20B6.1	up	X
WBGene00017628	F20B6.4	up	X
WBGene00017629	F20B6.5	up	X
WBGene00017641	csr-1	down	Autosome
WBGene00017644	exc-9	up	Autosome
WBGene00017653	F21C10.3	up	Autosome
WBGene00017686	F21H12.6	down	Autosome
WBGene00017713	F22E5.20	up	Autosome
WBGene00017728	F22H10.4	up	X
WBGene00017734	F23C8.5	up	Autosome
WBGene00017744	fbxc-54	up	Autosome
WBGene00017755	F23F12.9	up	Autosome
WBGene00017759	F23H11.3	down	Autosome
WBGene00017782	F25E5.1	up	Autosome
WBGene00017816	F26B1.2	down	Autosome
WBGene00017855	F27C1.6	down	Autosome
WBGene00017861	F27D9.2	up	X
WBGene00017864	pcca-1	up	X
WBGene00017874	acdh-9	up	Autosome
WBGene00017898	F28C10.3	up	X
WBGene00017908	F28H1.1	up	Autosome
WBGene00017924	F29B9.10	down	Autosome
WBGene00017939	F31A3.5	up	X
WBGene00017949	F31D5.6	up	Autosome
WBGene00017970	F32A5.4	down	Autosome
WBGene00017974	vps-41	up	X
WBGene00017984	F32D1.5	down	Autosome
WBGene00018008	vpr-1	down	Autosome
WBGene00018037	chtl-1	up	X
WBGene00018060	arrd-18	up	Autosome
WBGene00018061	arrd-19	up	Autosome
WBGene00018073	F35H10.10	up	Autosome
WBGene00018075	tbc-11	up	X
WBGene00018076	F35H12.4	up	X
WBGene00018077	F35H12.5	up	X
WBGene00018099	ztf-28	up	Autosome
WBGene00018140	F37B4.10	up	Autosome
WBGene00018145	F37C4.5	up	Autosome
WBGene00018164	F38A5.7	up	Autosome
WBGene00018193	F39C12.1	up	X
WBGene00018199	F39E9.7	up	Autosome
WBGene00018203	F39F10.3	up	X
WBGene00018230	F40E3.2	down	Autosome
WBGene00018238	F40F4.7	up	X
WBGene00018259	F41B4.3	up	X
WBGene00018310	F41G4.7	up	X
WBGene00018319	hdac-6	down	Autosome
WBGene00018323	F42A6.1	up	Autosome
WBGene00018330	elks-1	up	Autosome
WBGene00018335	F42A9.6	down	Autosome
WBGene00018345	F42C5.3	up	Autosome
WBGene00018349	F42C5.9	up	Autosome
WBGene00018358	F42G8.7	up	Autosome
WBGene00018386	F43C11.9	up	Autosome
WBGene00018399	F43H9.3	down	Autosome
WBGene00018421	F44E2.8	down	Autosome
WBGene00018433	F45C12.2	up	Autosome
WBGene00018446	F45C12.15	up	Autosome
WBGene00018473	F45E4.11	up	Autosome
WBGene00018483	F45F2.11	down	Autosome
WBGene00018491	mdh-1	up	Autosome
WBGene00018516	tag-257	up	X
WBGene00018518	F46H5.2	up	X
WBGene00018519	F46H5.3	up	X
WBGene00018520	F46H5.4	up	X
WBGene00018532	F47B7.1	up	X
WBGene00018533	F47B7.2	up	X
WBGene00018537	F47B7.6	up	X
WBGene00018577	asna-2	up	X
WBGene00018578	F47G3.3	up	X
WBGene00018593	F48B9.8	up	X
WBGene00018604	F48E3.3	up	X
WBGene00018605	F48E3.4	up	X
WBGene00018613	skpt-1	down	Autosome
WBGene00018634	F49E7.2	up	X
WBGene00018636	F49E8.2	down	Autosome
WBGene00018647	F49F1.7	up	Autosome
WBGene00018657	acl-4	up	X
WBGene00018660	F52C6.3	up	Autosome
WBGene00018688	F52D2.6	up	X
WBGene00018689	F52D2.7	up	X
WBGene00018700	F52E1.13	down	Autosome
WBGene00018701	pccb-1	up	X
WBGene00018702	F52E4.5	up	X
WBGene00018703	sec-3	up	X
WBGene00018704	ztf-13	up	X
WBGene00018710	F52G3.1	up	X
WBGene00018713	F52G3.5	up	X
WBGene00018714	F52H2.1	up	X
WBGene00018716	F52H2.4	up	X
WBGene00018717	F52H2.5	up	X
WBGene00018719	F52H2.7	up	X
WBGene00018735	F53B1.2	up	X
WBGene00018740	tra-4	up	X
WBGene00018756	F53C3.13	down	Autosome
WBGene00018757	tag-304	up	Autosome
WBGene00018761	F53E10.5	up	Autosome
WBGene00018788	shc-1	up	Autosome
WBGene00018804	F54D10.3	up	Autosome
WBGene00018811	pmt-2	up	Autosome
WBGene00018837	F54G2.1	up	X
WBGene00018838	F54G2.2	up	X
WBGene00018846	eef-1B.1	down	Autosome
WBGene00018853	sec-22	up	X
WBGene00018857	stau-1	up	X
WBGene00018872	F55C12.5	down	Autosome
WBGene00018878	glit-1	up	X
WBGene00018891	F55F8.3	down	Autosome
WBGene00018902	F55G1.6	down	Autosome
WBGene00018921	sago-2	down	Autosome
WBGene00018925	F56A11.5	up	Autosome
WBGene00018935	skr-18	down	Autosome
WBGene00018966	F56D2.5	up	Autosome
WBGene00018987	lgl-1	up	X
WBGene00018991	F56F11.4	down	Autosome
WBGene00019012	F57C9.6	up	Autosome
WBGene00019070	F58H7.5	up	Autosome
WBGene00019074	F59A3.1	up	Autosome
WBGene00019075	F59A3.2	down	Autosome
WBGene00019102	F59C12.3	up	X
WBGene00019120	npl-4.1	down	Autosome
WBGene00019141	bath-5	down	Autosome
WBGene00019189	H11L12.1	up	X
WBGene00019207	H17B01.1	up	Autosome
WBGene00019249	H28G03.1	up	X
WBGene00019250	H28G03.2	up	X
WBGene00019254	H31G24.3	down	Autosome
WBGene00019264	H35B03.2	down	Autosome
WBGene00019275	H43I07.2	down	Autosome
WBGene00019317	K02E10.1	up	X
WBGene00019334	K02F3.12	down	Autosome
WBGene00019338	K02F6.4	up	Autosome
WBGene00019343	K02F6.9	up	Autosome
WBGene00019344	K02G10.1	up	X
WBGene00019372	K03H9.3	up	Autosome
WBGene00019380	K04C2.2	down	Autosome
WBGene00019399	K04F10.7	down	Autosome
WBGene00019401	nuo-4	down	Autosome
WBGene00019408	K05F1.6	up	Autosome
WBGene00019427	atg-16.2	up	Autosome
WBGene00019429	K06A5.1	down	Autosome
WBGene00019434	K06A5.8	up	Autosome
WBGene00019456	K06H7.2	up	Autosome
WBGene00019458	K06H7.7	down	Autosome
WBGene00019487	tag-218	up	Autosome
WBGene00019490	K07E3.1	up	X
WBGene00019491	K07E3.2	up	X
WBGene00019492	K07E3.4	up	X
WBGene00019510	K07H8.10	down	Autosome
WBGene00019511	K08A2.1	up	Autosome
WBGene00019513	K08A2.4	up	Autosome
WBGene00019521	dmd-7	down	Autosome
WBGene00019537	K08D12.3	down	Autosome
WBGene00019543	cif-1	down	Autosome
WBGene00019554	K09C4.10	up	X
WBGene00019593	K09F6.10	up	Autosome
WBGene00019611	K10B3.5	up	X
WBGene00019615	K10B4.3	up	Autosome
WBGene00019620	fah-1	up	X
WBGene00019629	cid-1	down	Autosome
WBGene00019631	K10D2.5	down	Autosome
WBGene00019656	K11G12.5	up	X
WBGene00019657	K11G12.6	up	X
WBGene00019666	sago-1	up	Autosome
WBGene00019678	K12H4.3	down	Autosome
WBGene00019686	K12H6.6	up	Autosome
WBGene00019712	M01E11.3	down	Autosome
WBGene00019729	M02D8.3	up	X
WBGene00019733	M02E1.1	up	X
WBGene00019748	atg-2	up	X
WBGene00019760	calu-1	up	X
WBGene00019781	M60.6	up	X
WBGene00019792	M116.5	down	Autosome
WBGene00019795	M151.3	up	Autosome
WBGene00019796	M151.4	up	Autosome
WBGene00019799	M151.7	up	Autosome
WBGene00019800	mtss-1	down	Autosome
WBGene00019813	ger-1	up	Autosome
WBGene00019827	mop-25.1	up	X
WBGene00019828	R02E12.4	up	X
WBGene00019830	hrg-1	up	X
WBGene00019841	R02F11.3	up	Autosome
WBGene00019848	R03G5.7	up	X
WBGene00019858	R03H10.6	up	Autosome
WBGene00019862	nrde-3	up	X
WBGene00019863	R04A9.3	up	X
WBGene00019864	R04A9.5	up	X
WBGene00019871	R04E5.8	up	X
WBGene00019872	R04E5.9	up	X
WBGene00019892	R05F9.9	up	Autosome
WBGene00019893	sgt-1	down	Autosome
WBGene00019899	R05G6.5	up	Autosome
WBGene00019900	R05G6.7	down	Autosome
WBGene00019915	tbc-10	up	Autosome
WBGene00019918	fbxc-36	up	Autosome
WBGene00019924	fbxc-33	up	Autosome
WBGene00019937	R07E4.3	up	X
WBGene00019938	R07E4.5	up	X
WBGene00019941	pgam-5	down	Autosome
WBGene00019956	fbxb-75	up	Autosome
WBGene00019959	R08E3.3	up	X
WBGene00019967	cyp-33C8	up	Autosome
WBGene00019987	R09F10.3	up	X
WBGene00019989	R09F10.8	up	X
WBGene00019991	R09H3.3	up	X
WBGene00020003	R11E3.1	up	Autosome
WBGene00020004	R11E3.2	up	Autosome
WBGene00020006	set-15	up	Autosome
WBGene00020011	R11G1.2	up	X
WBGene00020018	R12B2.2	up	Autosome
WBGene00020025	R12C12.5	up	Autosome
WBGene00020050	R13A5.7	up	Autosome
WBGene00020053	R13A5.11	up	Autosome
WBGene00020090	R119.5	up	Autosome
WBGene00020099	R144.11	down	Autosome
WBGene00020103	R148.4	down	Autosome
WBGene00020106	R151.1	up	Autosome
WBGene00020142	aak-2	up	X
WBGene00020160	igcm-3	up	X
WBGene00020183	T03D3.5	up	Autosome
WBGene00020197	T03G11.4	up	X
WBGene00020199	T03G11.6	up	X
WBGene00020205	arrd-1	up	Autosome
WBGene00020207	T04B8.5	up	Autosome
WBGene00020214	T04G9.1	up	X
WBGene00020216	trap-2	up	X
WBGene00020227	T05A8.1	up	Autosome
WBGene00020235	T05A12.4	up	Autosome
WBGene00020256	T05C3.6	up	Autosome
WBGene00020263	T05E8.3	down	Autosome
WBGene00020269	T05H4.6a	down	Autosome
WBGene00020291	T06D4.2	up	Autosome
WBGene00020299	T07A9.12	up	Autosome
WBGene00020314	T07E3.3	down	Autosome
WBGene00020317	pdf-1	down	Autosome
WBGene00020322	T07F12.2	up	X
WBGene00020334	atg-11	up	X
WBGene00020366	acdh-10	up	X
WBGene00020379	T09B4.5	up	Autosome
WBGene00020382	T09B4.8	up	Autosome
WBGene00020383	T09B4.9	down	Autosome
WBGene00020389	T10B5.3	down	Autosome
WBGene00020397	pcbd-1	up	Autosome
WBGene00020407	T10D4.3	up	Autosome
WBGene00020411	T10E9.1	down	Autosome
WBGene00020412	T10E9.2	down	Autosome
WBGene00020422	T10F2.2	down	Autosome
WBGene00020423	T10F2.4	down	Autosome
WBGene00020425	syx-18	down	Autosome
WBGene00020443	esyt-2	up	Autosome
WBGene00020457	fbxa-67	up	Autosome
WBGene00020459	fbxa-23	up	Autosome
WBGene00020486	T13C5.6	up	X
WBGene00020491	T13G4.4	up	X
WBGene00020496	spat-3	up	X
WBGene00020507	vha-15	up	X
WBGene00020508	T14F9.2	up	X
WBGene00020511	immt-1	up	X
WBGene00020527	T15B7.15	up	Autosome
WBGene00020562	T19C3.4	up	Autosome
WBGene00020596	oga-1	up	X
WBGene00020630	T20F7.1	up	X
WBGene00020633	aakg-2	up	X
WBGene00020675	T22B11.1	up	Autosome
WBGene00020693	T22E7.1	up	Autosome
WBGene00020710	T23B3.2	up	Autosome
WBGene00020726	T23C6.4	up	X
WBGene00020729	T23E1.2	down	Autosome
WBGene00020738	T23F2.5	up	X
WBGene00020757	ucr-2.3	down	Autosome
WBGene00020761	T24C4.5	down	Autosome
WBGene00020767	lgc-40	up	X
WBGene00020784	tat-4	up	Autosome
WBGene00020812	acdh-7	up	X
WBGene00020825	T26A8.2	up	Autosome
WBGene00020830	T26C11.4	up	X
WBGene00020833	T26C12.3	up	Autosome
WBGene00020838	T27A3.1	up	Autosome
WBGene00020883	fbxa-64	up	Autosome
WBGene00020902	jmjc-1	up	Autosome
WBGene00020915	nol-5	down	Autosome
WBGene00020919	set-19	up	X
WBGene00020930	hlh-30	up	Autosome
WBGene00020931	W02D3.1	up	Autosome
WBGene00020998	W03F8.10	up	Autosome
WBGene00021014	W03G9.2	down	Autosome
WBGene00021035	W05F2.3	down	Autosome
WBGene00021039	W05F2.7	up	Autosome
WBGene00021043	W05G11.6	down	Autosome
WBGene00021044	W05H7.1	up	X
WBGene00021046	sedl-1	up	X
WBGene00021047	zfp-3	up	X
WBGene00021048	W05H9.1	up	X
WBGene00021049	W05H9.2	up	X
WBGene00021050	W05H9.3	up	X
WBGene00021051	W05H9.4	up	X
WBGene00021059	W06B11.1	up	X
WBGene00021073	nol-1	down	Autosome
WBGene00021088	W08E12.7	down	Autosome
WBGene00021186	Y9D1A.1	up	Autosome
WBGene00021192	Y14H12B.2	down	Autosome
WBGene00021210	Y18H1A.4	down	Autosome
WBGene00021247	Y22D7AL.9	down	Autosome
WBGene00021264	fbxa-13	up	Autosome
WBGene00021287	Y24D9B.1	up	Autosome
WBGene00021296	Y25C1A.13	up	Autosome
WBGene00021299	Y27F2A.8	up	Autosome
WBGene00021319	Y34B4A.2	up	X
WBGene00021323	Y34B4A.7	up	X
WBGene00021324	Y34B4A.8	up	X
WBGene00021340	Y34F4.5	down	Autosome
WBGene00021350	Y37E3.8	down	Autosome
WBGene00021355	Y37E3.17	down	Autosome
WBGene00021396	cutl-24	down	Autosome
WBGene00021406	Y38C1AB.4	up	Autosome
WBGene00021427	Y38F2AR.9	up	Autosome
WBGene00021428	Y38F2AR.10	down	Autosome
WBGene00021444	Y39A3CR.3	down	Autosome
WBGene00021471	Y39G10AR.15	up	Autosome
WBGene00021482	Y39H10A.6	up	Autosome
WBGene00021485	Y40A1A.3	up	X
WBGene00021486	lbp-9	down	Autosome
WBGene00021605	Y46H3C.5	up	Autosome
WBGene00021613	Y47A7.1	down	Autosome
WBGene00021629	scpl-3	up	Autosome
WBGene00021637	Y47G6A.7	up	Autosome
WBGene00021651	Y47G6A.27	down	Autosome
WBGene00021654	Y47G7B.2	up	Autosome
WBGene00021657	Y48G1A.1	down	Autosome
WBGene00021671	Y48G1BM.6	up	Autosome
WBGene00021677	pgs-1	down	Autosome
WBGene00021679	Y48G1C.6	up	Autosome
WBGene00021697	gcn-1	down	Autosome
WBGene00021704	Y48G9A.11	down	Autosome
WBGene00021721	Y49F6B.9	down	Autosome
WBGene00021747	Y50D4C.2	down	Autosome
WBGene00021750	Y50D4C.6	down	Autosome
WBGene00021757	Y50D7A.9	down	Autosome
WBGene00021811	ral-1	up	Autosome
WBGene00021817	Y53G8B.1	up	Autosome
WBGene00021849	Y54F10AM.5	up	Autosome
WBGene00021855	Y54F10AR.2	down	Autosome
WBGene00021863	Y54F10BM.9	up	Autosome
WBGene00021866	Y54F10BM.12	down	Autosome
WBGene00021899	Y54H5A.1	down	Autosome
WBGene00021903	Y55B1AL.1	up	Autosome
WBGene00021912	Y55B1BR.2	up	Autosome
WBGene00021920	Y55F3AM.1	down	Autosome
WBGene00021928	Y55F3AM.11	down	Autosome
WBGene00021977	Y58A7A.3	up	Autosome
WBGene00022010	catp-7	up	Autosome
WBGene00022042	Y65B4BR.5	down	Autosome
WBGene00022046	Y66H1A.4	down	Autosome
WBGene00022048	fln-1	down	Autosome
WBGene00022089	Y69A2AR.18	down	Autosome
WBGene00022113	Y71F9AL.8	down	Autosome
WBGene00022114	Y71F9AL.9	down	Autosome
WBGene00022139	tub-2	up	Autosome
WBGene00022151	Y71G12B.11	up	Autosome
WBGene00022199	Y71H10A.1	up	X
WBGene00022201	Y71H10B.1	up	X
WBGene00022219	Y73B3A.18	up	X
WBGene00022235	sqd-1	down	Autosome
WBGene00022248	Y73B6BL.27	up	Autosome
WBGene00022252	Y73B6BL.31	up	Autosome
WBGene00022259	Y73C8B.2	up	Autosome
WBGene00022260	Y73C8B.3	up	Autosome
WBGene00022269	Y73E7A.2	down	Autosome
WBGene00022276	nlp-40	up	Autosome
WBGene00022335	Y82E9BR.2	down	Autosome
WBGene00022377	Y94H6A.4	up	Autosome
WBGene00022386	Y95B8A.6	down	Autosome
WBGene00022390	him-19	down	Autosome
WBGene00022398	Y97E10AR.3	down	Autosome
WBGene00022410	Y97E10C.1	up	Autosome
WBGene00022448	Y110A2AL.13	down	Autosome
WBGene00022462	Y110A7A.15	down	Autosome
WBGene00022464	Y110A7A.19	down	Autosome
WBGene00022465	Y110A7A.20	up	Autosome
WBGene00022466	Y119C1A.1	down	Autosome
WBGene00022467	Y119C1B.1	up	Autosome
WBGene00022475	Y119C1B.10	up	Autosome
WBGene00022499	set-30	up	X
WBGene00022501	ZC8.6	up	X
WBGene00022502	ZC13.1	up	X
WBGene00022522	ZC132.3	up	Autosome
WBGene00022554	ZC204.2	up	Autosome
WBGene00022569	ZC239.6	up	Autosome
WBGene00022613	ZC449.3	up	X
WBGene00022647	ZK54.1	up	X
WBGene00022666	ZK154.4	up	X
WBGene00022667	ZK154.5	up	X
WBGene00022668	ZK154.6	up	X
WBGene00022674	ZK177.9	up	Autosome
WBGene00022705	ZK354.2	up	Autosome
WBGene00022706	ZK354.3	up	Autosome
WBGene00022737	ZK418.8	down	Autosome
WBGene00022742	ZK430.7	down	Autosome
WBGene00022745	ZK470.2	up	X
WBGene00022769	ZK563.5	up	X
WBGene00022802	ZK688.7	up	Autosome
WBGene00022805	nhr-256	up	Autosome
WBGene00022817	upp-1	down	Autosome
WBGene00022830	ZK973.1	down	Autosome
WBGene00022846	ZK1055.5	up	Autosome
WBGene00022881	ZK1248.11	down	Autosome
WBGene00022882	ZK1248.13	down	Autosome
WBGene00022887	ZK1290.5	up	Autosome
WBGene00023419	F53F4.16	down	Autosome
WBGene00023491	tsp-21	up	X
WBGene00023497	lin-15B	up	X
WBGene00023498	lin-15A	up	X
WBGene00043068	F32E10.9	down	Autosome
WBGene00043537	W03G1.3	up	Autosome
WBGene00043992	F58A4.14	up	Autosome
WBGene00044026	W02B12.15	down	Autosome
WBGene00044061	tbc-12	up	X
WBGene00044071	tag-233	up	X
WBGene00044134	D1025.10	up	X
WBGene00044142	H13N06.7	up	X
WBGene00044198	F56H9.6	down	Autosome
WBGene00044243	F16C3.4	up	Autosome
WBGene00044256	Y45F10C.6	up	Autosome
WBGene00044296	F10C1.9	up	Autosome
WBGene00044326	tag-322	down	Autosome
WBGene00044355	ZK563.7	up	X
WBGene00044423	F53F10.8	down	Autosome
WBGene00044436	Y47G6A.31	up	Autosome
WBGene00044443	ZC21.10	up	Autosome
WBGene00044508	nsy-7	up	Autosome
WBGene00044638	F23A7.8	down	X
WBGene00044644	B0205.13	up	Autosome
WBGene00044760	Y71H2AM.25	up	Autosome
WBGene00044949	Y49A10A.2	up	X
WBGene00044989	Y37A1B.17	up	Autosome
WBGene00045237	mrt-1	down	Autosome
WBGene00045247	F54H12.8	up	Autosome
WBGene00045272	F59C12.4	up	X
WBGene00045291	F23D12.10	up	X
WBGene00045392	F26D11.12	up	Autosome
WBGene00045393	F26D11.13	up	Autosome
WBGene00045401	T26F2.3	up	Autosome
WBGene00045435	Y34B4A.11	up	X
WBGene00045495	F11C1.7	up	X
WBGene00045507	F10A3.17	up	Autosome
WBGene00045511	F11A5.18	up	Autosome
WBGene00050899	T10C6.15	up	Autosome
WBGene00050944	C14A11.9	up	X
WBGene00077500	C27H6.9	down	Autosome
WBGene00077761	F17C11.17	up	Autosome
WBGene00138721	C54D10.14	up	Autosome
WBGene00185102	Y105C5A.1268	up	Autosome
WBGene00185118	K02E2.11	up	Autosome
WBGene00189957	M03F8.7	up	Autosome
WBGene00194651	C33D9.13	up	Autosome
WBGene00194679	T26C11.9	up	X
WBGene00194713	F19B10.13	up	Autosome

## Sheet: mes-3 vs wt PGCs
Wormbase_ID	Public_ID	change_mutant_vs_wt	X_vs_Autosome
WBGene00000018	abl-1	up	X
WBGene00000040	aco-1	up	X
WBGene00000064	act-2	down	Autosome
WBGene00000074	adm-2	up	X
WBGene00000075	adm-4	up	X
WBGene00000092	ags-3	up	X
WBGene00000103	akt-2	up	X
WBGene00000105	alg-1	up	X
WBGene00000106	alg-2	up	Autosome
WBGene00000137	amx-1	up	Autosome
WBGene00000157	aps-2	up	X
WBGene00000161	apa-2	up	X
WBGene00000164	apm-3	up	X
WBGene00000168	apx-1	down	Autosome
WBGene00000178	aqp-10	up	Autosome
WBGene00000180	arc-1	up	Autosome
WBGene00000195	arr-1	up	X
WBGene00000207	asb-2	up	X
WBGene00000210	asg-2	up	X
WBGene00000216	asp-3	up	X
WBGene00000219	asp-6	up	Autosome
WBGene00000222	atf-6	up	X
WBGene00000229	atp-2	down	Autosome
WBGene00000245	bca-1	up	X
WBGene00000262	bra-1	up	X
WBGene00000275	bub-1	down	Autosome
WBGene00000294	cas-1	up	X
WBGene00000381	cct-6	down	Autosome
WBGene00000393	cdf-1	up	X
WBGene00000396	cdh-4	up	Autosome
WBGene00000397	cdh-5	up	Autosome
WBGene00000403	casy-1	up	Autosome
WBGene00000410	cdk-9	down	Autosome
WBGene00000444	ceh-21	up	X
WBGene00000460	ceh-39	up	X
WBGene00000462	ceh-41	up	X
WBGene00000473	cey-2	down	Autosome
WBGene00000474	cey-3	down	Autosome
WBGene00000475	cey-4	down	Autosome
WBGene00000479	cgh-1	down	Autosome
WBGene00000482	chd-3	up	X
WBGene00000485	che-3	up	Autosome
WBGene00000511	ckb-1	up	Autosome
WBGene00000591	coh-1	up	X
WBGene00000629	col-52	up	Autosome
WBGene00000706	col-132	down	Autosome
WBGene00000763	coq-3	down	Autosome
WBGene00000792	crb-1	up	X
WBGene00000797	crn-4	up	X
WBGene00000803	csb-1	up	X
WBGene00000884	cyn-8	up	X
WBGene00000914	daf-19	up	Autosome
WBGene00000929	dao-3	up	X
WBGene00000931	dao-5	down	Autosome
WBGene00000959	dgk-2	up	X
WBGene00001000	dim-1	up	X
WBGene00001008	dlk-1	up	Autosome
WBGene00001021	dnj-3	down	Autosome
WBGene00001025	dnj-7	up	X
WBGene00001032	dnj-14	up	X
WBGene00001044	dnj-26	down	Autosome
WBGene00001081	dpy-22	up	X
WBGene00001082	dpy-23	up	X
WBGene00001086	dpy-27	up	Autosome
WBGene00001101	dsh-1	up	Autosome
WBGene00001115	dyb-1	down	Autosome
WBGene00001130	dyn-1	up	X
WBGene00001161	efl-1	down	Autosome
WBGene00001168	eef-1A.1	down	Autosome
WBGene00001169	eef-1A.2	up	X
WBGene00001177	egl-8	up	Autosome
WBGene00001209	egl-45	down	Autosome
WBGene00001225	eif-3.B	down	Autosome
WBGene00001232	eif-3.I	down	Autosome
WBGene00001234	eif-6	down	Autosome
WBGene00001325	eor-2	up	X
WBGene00001329	epn-1	up	X
WBGene00001330	eps-8	up	Autosome
WBGene00001331	erd-2	up	X
WBGene00001336	qars-1	down	Autosome
WBGene00001423	fib-1	down	Autosome
WBGene00001427	fkb-2	down	Autosome
WBGene00001479	fmo-4	up	Autosome
WBGene00001483	fog-3	down	Autosome
WBGene00001485	fre-1	down	Autosome
WBGene00001535	gcy-8	up	Autosome
WBGene00001569	gei-12	up	X
WBGene00001579	gex-2	up	Autosome
WBGene00001583	gfi-3	up	X
WBGene00001613	glr-2	down	Autosome
WBGene00001617	glr-6	up	X
WBGene00001619	glr-8	up	X
WBGene00001637	gly-12	up	X
WBGene00001649	gob-1	up	X
WBGene00001683	gpd-1	down	Autosome
WBGene00001710	grl-1	up	Autosome
WBGene00001746	gsk-3	down	Autosome
WBGene00001755	gst-7	up	Autosome
WBGene00001778	gst-30	up	Autosome
WBGene00001832	hcp-4	down	Autosome
WBGene00001844	hid-1	up	X
WBGene00001898	his-24	up	X
WBGene00001911	his-37	down	Autosome
WBGene00001942	his-68	down	Autosome
WBGene00001945	his-71	up	X
WBGene00001971	hmg-1.1	down	Autosome
WBGene00001977	hmg-12	down	Autosome
WBGene00001994	hpk-1	up	X
WBGene00002007	hsp-3	up	X
WBGene00002019	hsp-16.48	up	Autosome
WBGene00002020	hsp-16.49	up	Autosome
WBGene00002029	hst-2	up	X
WBGene00002031	hst-6	up	X
WBGene00002044	hyl-2	up	X
WBGene00002045	icd-1	down	Autosome
WBGene00002060	ife-2	up	X
WBGene00002064	iff-1	down	Autosome
WBGene00002071	ile-2	up	X
WBGene00002073	ima-2	down	Autosome
WBGene00002075	imb-1	down	Autosome
WBGene00002077	imb-3	down	Autosome
WBGene00002083	inf-1	down	Autosome
WBGene00002124	inx-2	up	X
WBGene00002186	kel-10	up	Autosome
WBGene00002187	kgb-1	up	Autosome
WBGene00002196	kin-10	down	Autosome
WBGene00002207	kin-25	up	X
WBGene00002295	let-19	up	Autosome
WBGene00002632	let-413	up	Autosome
WBGene00002979	lfe-2	up	Autosome
WBGene00002986	lig-4	down	Autosome
WBGene00003040	lin-59	up	Autosome
WBGene00003043	lip-1	down	Autosome
WBGene00003053	lmp-1	up	X
WBGene00003072	lrp-2	up	Autosome
WBGene00003084	lst-2	up	X
WBGene00003111	mab-20	up	Autosome
WBGene00003149	mbk-1	up	X
WBGene00003150	mbk-2	down	Autosome
WBGene00003161	mdf-2	down	Autosome
WBGene00003185	mek-1	up	X
WBGene00003214	mel-32	down	Autosome
WBGene00003219	mes-1	up	X
WBGene00003246	mig-14	down	Autosome
WBGene00003254	mig-23	up	X
WBGene00003394	mom-1	up	X
WBGene00003404	mpz-1	up	Autosome
WBGene00003411	mrp-5	up	X
WBGene00003477	mtm-5	up	X
WBGene00003495	mup-2	down	X
WBGene00003497	mup-4	up	Autosome
WBGene00003516	nab-1	up	Autosome
WBGene00003609	nhr-10	up	Autosome
WBGene00003612	nhr-13	up	Autosome
WBGene00003621	nhr-22	up	Autosome
WBGene00003636	nhr-46	up	Autosome
WBGene00003637	nhr-47	up	Autosome
WBGene00003651	nhr-61	down	Autosome
WBGene00003661	nhr-71	up	X
WBGene00003694	nhr-104	up	Autosome
WBGene00003733	nhx-5	up	X
WBGene00003803	npp-17	down	Autosome
WBGene00003822	nsy-1	up	Autosome
WBGene00003829	nud-1	down	Autosome
WBGene00003883	osm-1	up	X
WBGene00003903	pab-2	up	X
WBGene00003911	pak-1	up	X
WBGene00003932	pat-6	up	Autosome
WBGene00003954	pcm-1	up	Autosome
WBGene00003955	pcn-1	down	Autosome
WBGene00003963	pdi-2	up	X
WBGene00003970	pek-1	up	X
WBGene00004037	plc-2	up	Autosome
WBGene00004053	pme-5	up	Autosome
WBGene00004076	pod-2	down	Autosome
WBGene00004086	pph-4.2	down	Autosome
WBGene00004089	ppk-3	up	X
WBGene00004131	pqn-44	up	Autosome
WBGene00004134	pqn-47	up	Autosome
WBGene00004143	pqn-59	down	Autosome
WBGene00004148	pqn-65	up	X
WBGene00004179	prg-2	down	Autosome
WBGene00004245	puf-9	up	X
WBGene00004254	pxf-1	down	Autosome
WBGene00004259	pyr-1	up	Autosome
WBGene00004277	rab-18	down	Autosome
WBGene00004300	ram-2	up	Autosome
WBGene00004302	ran-1	down	Autosome
WBGene00004313	rbc-1	up	X
WBGene00004317	rbg-1	up	X
WBGene00004334	ref-1	up	Autosome
WBGene00004336	ret-1	down	Autosome
WBGene00004354	rgs-11	up	X
WBGene00004356	rhi-1	up	X
WBGene00004375	rme-4	up	X
WBGene00004385	rnp-2	down	Autosome
WBGene00004408	rla-0	down	Autosome
WBGene00004409	rla-1	down	Autosome
WBGene00004410	rla-2	down	Autosome
WBGene00004413	rpl-2	down	Autosome
WBGene00004415	rpl-4	down	Autosome
WBGene00004417	rpl-6	down	Autosome
WBGene00004418	rpl-7	down	Autosome
WBGene00004419	rpl-7A	down	Autosome
WBGene00004422	rpl-11.1	down	Autosome
WBGene00004423	rpl-11.2	up	X
WBGene00004427	rpl-15	down	Autosome
WBGene00004429	rpl-17	down	Autosome
WBGene00004430	rpl-18	down	Autosome
WBGene00004432	rpl-20	down	Autosome
WBGene00004433	rpl-21	down	Autosome
WBGene00004435	rpl-23	down	Autosome
WBGene00004438	rpl-25.1	up	X
WBGene00004442	rpl-28	down	Autosome
WBGene00004445	rpl-31	down	Autosome
WBGene00004447	rpl-33	down	Autosome
WBGene00004448	rpl-34	down	Autosome
WBGene00004450	rpl-36	down	Autosome
WBGene00004454	rpl-41	down	Autosome
WBGene00004461	rpn-5	down	Autosome
WBGene00004469	rps-0	down	Autosome
WBGene00004470	rps-1	down	Autosome
WBGene00004471	rps-2	down	Autosome
WBGene00004473	rps-4	down	Autosome
WBGene00004474	rps-5	down	Autosome
WBGene00004475	rps-6	down	Autosome
WBGene00004476	rps-7	down	Autosome
WBGene00004477	rps-8	down	Autosome
WBGene00004478	rps-9	down	Autosome
WBGene00004482	rps-13	down	Autosome
WBGene00004483	rps-14	down	Autosome
WBGene00004484	rps-15	down	Autosome
WBGene00004488	rps-19	down	Autosome
WBGene00004489	rps-20	down	Autosome
WBGene00004491	rps-22	down	Autosome
WBGene00004493	rps-24	down	Autosome
WBGene00004495	rps-26	down	Autosome
WBGene00004496	rps-27	down	Autosome
WBGene00004509	rrf-2	up	Autosome
WBGene00004682	rsd-3	up	X
WBGene00004727	sax-1	up	X
WBGene00004745	sdc-1	up	X
WBGene00004769	sel-12	up	X
WBGene00004774	sem-5	up	X
WBGene00004790	sgn-1	up	Autosome
WBGene00004798	sip-1	down	Autosome
WBGene00004808	skr-2	down	Autosome
WBGene00004855	sma-1	up	Autosome
WBGene00004876	smf-1	up	X
WBGene00004891	smr-1	down	Autosome
WBGene00004893	sms-2	up	X
WBGene00004978	spg-7	down	Autosome
WBGene00005008	spr-3	up	X
WBGene00006066	sto-4	up	X
WBGene00006351	sur-5	up	X
WBGene00006368	sym-3	up	X
WBGene00006369	sym-4	up	X
WBGene00006371	syx-3	up	X
WBGene00006393	taf-11.1	up	X
WBGene00006410	nck-1	up	X
WBGene00006432	tag-53	up	X
WBGene00006436	ttn-1	up	Autosome
WBGene00006439	ant-1.1	down	Autosome
WBGene00006472	tag-123	up	X
WBGene00006477	tag-130	up	X
WBGene00006479	tmbi-4	up	X
WBGene00006493	tag-147	up	X
WBGene00006494	hke-4.2	up	X
WBGene00006496	cgef-1	up	X
WBGene00006517	tag-172	up	X
WBGene00006528	tba-1	down	Autosome
WBGene00006529	tba-2	down	Autosome
WBGene00006536	tbb-1	down	Autosome
WBGene00006537	tbb-2	down	Autosome
WBGene00006539	tbb-6	up	Autosome
WBGene00006565	tfg-1	down	Autosome
WBGene00006602	tps-1	up	X
WBGene00006615	trp-2	up	Autosome
WBGene00006617	tars-1	down	Autosome
WBGene00006619	try-1	down	Autosome
WBGene00006699	uba-1	down	Autosome
WBGene00006706	ubc-9	down	Autosome
WBGene00006714	ubc-19	down	Autosome
WBGene00006725	ubl-1	down	Autosome
WBGene00006728	ubq-2	down	Autosome
WBGene00006738	ulp-3	down	Autosome
WBGene00006752	unc-13	up	Autosome
WBGene00006757	unc-18	up	X
WBGene00006767	unc-31	up	Autosome
WBGene00006780	unc-44	up	Autosome
WBGene00006781	unc-45	down	Autosome
WBGene00006786	unc-51	up	Autosome
WBGene00006794	unc-60	down	Autosome
WBGene00006804	unc-71	down	Autosome
WBGene00006815	unc-83	up	Autosome
WBGene00006816	unc-84	up	X
WBGene00006876	vab-10	up	Autosome
WBGene00006890	vem-1	up	X
WBGene00006921	vha-12	up	X
WBGene00006924	vig-1	down	Autosome
WBGene00006941	wnk-1	down	Autosome
WBGene00006964	xrn-2	down	Autosome
WBGene00006971	zak-1	up	Autosome
WBGene00007011	mdt-1.2	up	X
WBGene00007053	tag-192	up	Autosome
WBGene00007059	vps-52	up	X
WBGene00007091	B0001.6	up	Autosome
WBGene00007132	B0284.2	up	Autosome
WBGene00007143	B0334.3	down	Autosome
WBGene00007267	C03A3.2	up	X
WBGene00007286	C04A11.2	up	X
WBGene00007297	C04F12.1	up	Autosome
WBGene00007348	C05G5.2	up	X
WBGene00007350	C05G5.4	up	X
WBGene00007354	C06A1.3	down	Autosome
WBGene00007363	stdh-1	up	Autosome
WBGene00007388	folt-1	up	Autosome
WBGene00007444	C08F8.2	down	Autosome
WBGene00007516	C11E4.1	down	X
WBGene00007524	C11G6.3	up	X
WBGene00007603	C15C6.4	down	Autosome
WBGene00007651	nra-3	up	X
WBGene00007668	C18B12.6	up	X
WBGene00007756	C27A7.5	up	Autosome
WBGene00007773	C27C12.3	up	X
WBGene00007774	C27C12.4	up	X
WBGene00007846	C31E10.5	up	X
WBGene00007847	C31E10.6	up	X
WBGene00007848	C31E10.7	up	X
WBGene00007941	C34F6.7	up	X
WBGene00007942	idh-2	up	X
WBGene00007943	C34F6.9	up	X
WBGene00007953	hdac-11	up	Autosome
WBGene00007955	C35C5.3	up	X
WBGene00007956	C35C5.6	up	X
WBGene00007976	C36B1.9	up	Autosome
WBGene00007980	C36E8.1	down	Autosome
WBGene00007993	C37E2.1	up	X
WBGene00008003	C38D4.1	down	Autosome
WBGene00008085	C44C10.4	up	X
WBGene00008094	C44H4.4	up	X
WBGene00008099	C44H9.4	up	Autosome
WBGene00008110	C46C2.2	up	Autosome
WBGene00008210	C49F5.6	up	X
WBGene00008222	C50B6.9	up	Autosome
WBGene00008283	C53D6.6	up	Autosome
WBGene00008301	dct-3	up	Autosome
WBGene00008302	C54D10.8	up	Autosome
WBGene00008353	D1025.1	up	X
WBGene00008355	fbxa-141	up	X
WBGene00008585	F08G12.1	up	X
WBGene00008586	F08G12.2	up	X
WBGene00008587	F08G12.3	up	X
WBGene00008622	F09C8.2	up	X
WBGene00008690	F11C1.1	up	X
WBGene00008691	mff-1	up	X
WBGene00008694	F11C1.5	up	X
WBGene00008749	F13E6.5	up	X
WBGene00008805	git-1	up	X
WBGene00008806	mboa-7	up	X
WBGene00008874	F15H10.7	up	Autosome
WBGene00008880	F16B12.4	up	X
WBGene00008882	F16B12.6	up	X
WBGene00008883	F16B12.7	up	X
WBGene00008889	F16D3.6	up	Autosome
WBGene00008927	F17H10.3	up	X
WBGene00008940	F18H3.4	up	X
WBGene00008945	F19B2.6	up	Autosome
WBGene00008948	F19B6.1	down	Autosome
WBGene00008951	F19C6.2	up	X
WBGene00008958	F19H6.3	up	X
WBGene00008974	tbc-1	up	X
WBGene00008975	F20D1.3	up	X
WBGene00008976	plp-2	up	X
WBGene00008979	F20D1.9	up	X
WBGene00008980	tag-299	up	X
WBGene00008986	F20G2.2	up	Autosome
WBGene00009027	F21G4.6	up	X
WBGene00009064	F22G12.4	down	Autosome
WBGene00009077	F23B2.10	up	Autosome
WBGene00009110	F25D1.5	up	Autosome
WBGene00009113	F25D7.4	down	Autosome
WBGene00009115	F25F2.1	up	Autosome
WBGene00009116	F25H2.2	up	Autosome
WBGene00009119	F25H2.5	down	Autosome
WBGene00009122	tct-1	down	Autosome
WBGene00009126	pyk-1	down	Autosome
WBGene00009135	F25H9.2	up	Autosome
WBGene00009137	bath-39	up	Autosome
WBGene00009182	F26H11.4	down	Autosome
WBGene00009190	F27D4.6	up	Autosome
WBGene00009233	F28H6.4	up	X
WBGene00009342	fasn-1	up	Autosome
WBGene00009552	piki-1	up	X
WBGene00009647	F43C1.1	up	Autosome
WBGene00009674	nucb-1	up	X
WBGene00009691	F44E5.4	up	Autosome
WBGene00009790	lgc-44	up	Autosome
WBGene00009793	pkn-1	up	X
WBGene00009800	rrc-1	up	X
WBGene00009801	F47A4.5	up	X
WBGene00009813	F47B10.2	up	X
WBGene00009865	F49B2.6	down	Autosome
WBGene00009962	F53B6.7	down	Autosome
WBGene00009988	F53F4.4	up	Autosome
WBGene00010009	F53H4.4	up	X
WBGene00010011	F53H4.6	up	X
WBGene00010066	F54F7.6	up	X
WBGene00010172	oac-36	up	Autosome
WBGene00010185	F57A10.4	down	Autosome
WBGene00010199	bet-2	up	X
WBGene00010232	F58B3.6	down	Autosome
WBGene00010234	ttr-50	up	Autosome
WBGene00010317	idh-1	down	Autosome
WBGene00010336	F59F4.1	up	X
WBGene00010338	F59F4.3	up	X
WBGene00010351	cbd-1	down	Autosome
WBGene00010397	H13N06.4	up	X
WBGene00010433	H40L08.1	up	X
WBGene00010471	cdr-6	up	Autosome
WBGene00010481	K01G5.10	down	Autosome
WBGene00010492	meg-1	up	X
WBGene00010493	meg-2	up	X
WBGene00010552	K04C1.2	up	X
WBGene00010556	rack-1	down	Autosome
WBGene00010572	wdr-5.2	up	X
WBGene00010627	K07C5.4	down	Autosome
WBGene00010670	K08E4.6	down	Autosome
WBGene00010677	K08F4.2	down	Autosome
WBGene00010700	nipi-3	up	X
WBGene00010701	ent-2	up	X
WBGene00010702	usp-33	up	X
WBGene00010708	K09A11.5	up	X
WBGene00010725	erv-46	up	X
WBGene00010726	K09E9.3	up	X
WBGene00010788	sulp-4	up	Autosome
WBGene00010793	LLC1.2	up	Autosome
WBGene00010794	LLC1.3	down	Autosome
WBGene00010813	M01F1.7	up	Autosome
WBGene00010909	M88.7	down	Autosome
WBGene00010972	R01H10.4	up	Autosome
WBGene00010981	R03A10.1	up	X
WBGene00010984	nkat-3	up	X
WBGene00010993	R03E1.2	up	X
WBGene00011050	agl-1	down	Autosome
WBGene00011139	R08B4.3	up	X
WBGene00011152	R09A8.1	up	X
WBGene00011153	R09A8.2	up	X
WBGene00011155	R09B3.2	down	Autosome
WBGene00011156	R09B3.3	down	Autosome
WBGene00011199	tag-310	up	Autosome
WBGene00011225	R10H10.7	down	Autosome
WBGene00011232	R11A5.4	up	Autosome
WBGene00011291	R102.4	up	Autosome
WBGene00011441	T04F8.2	up	X
WBGene00011444	T04F8.6	up	X
WBGene00011498	T05G5.1	up	Autosome
WBGene00011501	rmd-1	down	Autosome
WBGene00011615	lsd-1	up	X
WBGene00011679	ucr-2.2	up	X
WBGene00011680	T10B10.3	up	X
WBGene00011692	T10G3.1	up	Autosome
WBGene00011767	T14D7.1	up	Autosome
WBGene00011820	T18D3.1	up	X
WBGene00011869	dod-6	down	Autosome
WBGene00011932	sptl-3	up	Autosome
WBGene00011990	T24D5.2	up	X
WBGene00012121	T28C6.7	up	Autosome
WBGene00012158	ucr-2.1	up	X
WBGene00012179	W01D2.1	down	Autosome
WBGene00012194	toe-4	down	Autosome
WBGene00012198	W02B8.2	up	Autosome
WBGene00012258	W04G3.5	up	X
WBGene00012295	W06B3.1	up	X
WBGene00012326	W07E11.1	up	X
WBGene00012352	dkf-1	up	Autosome
WBGene00012358	W09D6.5	down	Autosome
WBGene00012370	W09G3.7	down	Autosome
WBGene00012407	Y7A5A.1	up	X
WBGene00012423	Y10G11A.1	down	Autosome
WBGene00012472	Y17G7B.21	down	Autosome
WBGene00012481	Y18D10A.11	down	Autosome
WBGene00012484	car-1	down	Autosome
WBGene00012512	ekl-5	up	X
WBGene00012513	Y26E6A.2	up	X
WBGene00012552	Y37D8A.12	down	Autosome
WBGene00012665	pph-5	up	Autosome
WBGene00012694	Y39B6A.36	down	Autosome
WBGene00012715	Y39E4B.2	down	Autosome
WBGene00012716	Y39E4B.5	down	Autosome
WBGene00012758	Y41C4A.12	down	Autosome
WBGene00012769	Y41E3.11	down	Autosome
WBGene00012779	Y42A5A.4	up	Autosome
WBGene00012806	Y43F4B.9	down	Autosome
WBGene00012813	Y43F8B.2	up	Autosome
WBGene00012875	Y45F10B.13	up	Autosome
WBGene00012907	cpt-1	down	Autosome
WBGene00012911	acl-7	up	Autosome
WBGene00012964	Y48A6B.3	down	Autosome
WBGene00012983	men-1	down	Autosome
WBGene00012999	Y48E1A.1	down	Autosome
WBGene00013001	Y48E1B.2	down	Autosome
WBGene00013014	Y48E1C.1	down	Autosome
WBGene00013029	glrx-5	down	Autosome
WBGene00013030	Y49E10.4	down	Autosome
WBGene00013093	Y51H1A.2	down	Autosome
WBGene00013216	Y54G11A.7	up	Autosome
WBGene00013221	Y54G11A.14	down	Autosome
WBGene00013236	Y56A3A.18	down	Autosome
WBGene00013247	Y57A10A.2	down	Autosome
WBGene00013311	Y57G11C.15	down	Autosome
WBGene00013482	Y69H2.7	down	Autosome
WBGene00013580	Y79H2A.3	down	Autosome
WBGene00013587	Y80D3A.9	down	Autosome
WBGene00013613	Y102A5C.4	up	Autosome
WBGene00013632	Y105C5A.1	up	Autosome
WBGene00013683	zoo-1	up	Autosome
WBGene00013713	Y106G6G.4	up	Autosome
WBGene00013715	Y106G6G.6	up	Autosome
WBGene00013742	Y111B2A.24	down	Autosome
WBGene00013755	fbxa-115	up	Autosome
WBGene00013766	prmt-1	down	Autosome
WBGene00013847	cls-3	up	Autosome
WBGene00013873	ZC376.1	up	Autosome
WBGene00013894	ZC434.8	down	Autosome
WBGene00013917	ZC504.3	up	X
WBGene00013919	ZC506.1	up	X
WBGene00013920	pssy-1	up	X
WBGene00013963	sulp-8	up	Autosome
WBGene00014030	glb-1	up	Autosome
WBGene00014095	ZK829.4	down	Autosome
WBGene00015168	tag-320	up	X
WBGene00015200	B0454.9	up	Autosome
WBGene00015225	B0507.8	up	Autosome
WBGene00015227	B0507.10	up	Autosome
WBGene00015279	C01B10.4	up	Autosome
WBGene00015285	C01B12.2	up	Autosome
WBGene00015312	C01G8.1	down	Autosome
WBGene00015324	C02B8.6	up	X
WBGene00015386	C03B8.3	up	Autosome
WBGene00015391	sdha-1	up	X
WBGene00015400	cyp-35A2	up	Autosome
WBGene00015428	C04E7.1	up	X
WBGene00015429	sor-3	up	X
WBGene00015483	C05D11.5	up	Autosome
WBGene00015544	C06E8.5	up	Autosome
WBGene00015552	C06G3.6	up	Autosome
WBGene00015558	C06G4.4	up	Autosome
WBGene00015565	C07D8.6	up	X
WBGene00015580	cls-1	up	Autosome
WBGene00015620	C08G9.2	up	Autosome
WBGene00015662	C10A4.1	up	X
WBGene00015680	egal-1	up	Autosome
WBGene00015693	ugt-28	up	Autosome
WBGene00015735	pdfr-1	up	Autosome
WBGene00015777	sfxn-2	up	X
WBGene00015778	C14F11.1	up	X
WBGene00015787	C15B12.6	up	X
WBGene00015791	C15C7.5	up	X
WBGene00015793	C15C7.7	up	X
WBGene00015814	C16A3.10	down	Autosome
WBGene00015816	C16A11.3	down	Autosome
WBGene00015817	C16A11.4	down	Autosome
WBGene00015838	math-9	up	Autosome
WBGene00015866	C16E9.2	up	X
WBGene00015868	C16H3.3	up	X
WBGene00015887	C17C3.1	up	Autosome
WBGene00015922	C17H11.2	up	X
WBGene00015951	C18A11.6	up	X
WBGene00016009	C23F12.4	up	X
WBGene00016061	C24G6.6	up	Autosome
WBGene00016087	C25A11.2	up	X
WBGene00016131	C26B9.1	up	X
WBGene00016138	flh-2	up	Autosome
WBGene00016172	C27H5.2	up	Autosome
WBGene00016177	C28C12.1	up	Autosome
WBGene00016188	sec-15	up	X
WBGene00016264	C30F12.5	up	Autosome
WBGene00016266	C30F12.7	up	Autosome
WBGene00016273	C30G12.1	up	Autosome
WBGene00016289	lntl-1	up	Autosome
WBGene00016341	C33C12.9	down	Autosome
WBGene00016346	fbxa-120	up	X
WBGene00016438	C35B8.3	up	X
WBGene00016469	C36B7.6	up	X
WBGene00016485	C36C9.1	up	X
WBGene00016489	C36E6.1	up	X
WBGene00016493	C37A2.7	down	Autosome
WBGene00016506	C37H5.2	up	Autosome
WBGene00016507	C37H5.3	up	Autosome
WBGene00016509	C37H5.6	down	Autosome
WBGene00016511	C37H5.13	up	Autosome
WBGene00016631	C44B7.11	up	Autosome
WBGene00016642	C44C1.2	up	X
WBGene00016651	C44E4.2	down	Autosome
WBGene00016661	C45B2.6	up	X
WBGene00016698	C46A5.1	up	Autosome
WBGene00016701	C46A5.5	down	Autosome
WBGene00016704	C46C11.1	up	X
WBGene00016716	acs-17	up	X
WBGene00016737	C47C12.4	up	X
WBGene00016790	C49H3.3	down	Autosome
WBGene00016867	C52B9.4	up	X
WBGene00016868	C52B9.8	up	X
WBGene00016879	C52D10.12	up	Autosome
WBGene00016913	lam-2	up	X
WBGene00016939	C55B6.1	up	X
WBGene00016968	epg-5	up	Autosome
WBGene00016970	C56E6.2	up	Autosome
WBGene00016979	C56G2.4	up	Autosome
WBGene00016984	C56G3.1	up	X
WBGene00016995	D1005.1	up	X
WBGene00017046	utx-1	up	X
WBGene00017065	D2092.4	up	Autosome
WBGene00017072	D2096.5	up	Autosome
WBGene00017075	D2096.8	down	Autosome
WBGene00017168	F01F1.14	up	Autosome
WBGene00017177	F02E8.4	up	X
WBGene00017178	atg-16.1	up	X
WBGene00017195	glo-4	up	Autosome
WBGene00017265	F08F3.9	down	Autosome
WBGene00017300	F09F7.3	down	Autosome
WBGene00017342	F10D7.5	up	X
WBGene00017373	F10G7.10	up	Autosome
WBGene00017445	F14B8.2	up	X
WBGene00017482	set-9	down	Autosome
WBGene00017584	F19B10.2	up	Autosome
WBGene00017586	F19B10.4	up	Autosome
WBGene00017587	F19B10.5	up	Autosome
WBGene00017628	F20B6.4	up	X
WBGene00017629	F20B6.5	up	X
WBGene00017673	F21F3.3	up	Autosome
WBGene00017744	fbxc-54	up	Autosome
WBGene00017782	F25E5.1	up	Autosome
WBGene00017796	F25G6.1	down	Autosome
WBGene00017823	F26D11.6	up	Autosome
WBGene00017864	pcca-1	up	X
WBGene00017968	F32A5.2	up	Autosome
WBGene00017974	vps-41	up	X
WBGene00018037	chtl-1	up	X
WBGene00018061	arrd-19	up	Autosome
WBGene00018073	F35H10.10	up	Autosome
WBGene00018076	F35H12.4	up	X
WBGene00018077	F35H12.5	up	X
WBGene00018099	ztf-28	down	Autosome
WBGene00018140	F37B4.10	up	Autosome
WBGene00018193	F39C12.1	up	X
WBGene00018206	ugt-61	up	Autosome
WBGene00018223	bath-13	up	Autosome
WBGene00018235	F40E12.2	up	Autosome
WBGene00018237	F40F4.6	up	X
WBGene00018238	F40F4.7	up	X
WBGene00018259	F41B4.3	up	X
WBGene00018318	F41H10.5	down	Autosome
WBGene00018330	elks-1	up	Autosome
WBGene00018346	F42C5.4	up	Autosome
WBGene00018356	islo-1	up	Autosome
WBGene00018393	msra-1	up	Autosome
WBGene00018446	F45C12.15	up	Autosome
WBGene00018467	sdpn-1	up	X
WBGene00018516	tag-257	up	X
WBGene00018518	F46H5.2	up	X
WBGene00018519	F46H5.3	up	X
WBGene00018520	F46H5.4	up	X
WBGene00018533	F47B7.2	up	X
WBGene00018537	F47B7.6	up	X
WBGene00018577	asna-2	up	X
WBGene00018593	F48B9.8	up	X
WBGene00018603	F48E3.2	up	X
WBGene00018604	F48E3.3	up	X
WBGene00018605	F48E3.4	up	X
WBGene00018608	F48E3.9	up	X
WBGene00018613	skpt-1	down	Autosome
WBGene00018634	F49E7.2	up	X
WBGene00018657	acl-4	up	X
WBGene00018665	bath-4	down	Autosome
WBGene00018679	F52C12.2	down	Autosome
WBGene00018689	F52D2.7	up	X
WBGene00018701	pccb-1	up	X
WBGene00018703	sec-3	up	X
WBGene00018704	ztf-13	up	X
WBGene00018710	F52G3.1	up	X
WBGene00018714	F52H2.1	up	X
WBGene00018717	F52H2.5	up	X
WBGene00018719	F52H2.7	up	X
WBGene00018740	tra-4	up	X
WBGene00018762	F53E10.6	down	Autosome
WBGene00018788	shc-1	up	Autosome
WBGene00018837	F54G2.1	up	X
WBGene00018846	eef-1B.1	down	Autosome
WBGene00018853	sec-22	up	X
WBGene00018857	stau-1	up	X
WBGene00018878	glit-1	up	X
WBGene00018921	sago-2	down	Autosome
WBGene00018935	skr-18	down	Autosome
WBGene00018960	F56D1.2	down	Autosome
WBGene00018991	F56F11.4	down	Autosome
WBGene00019017	F57F4.4	up	Autosome
WBGene00019138	bath-21	up	Autosome
WBGene00019205	kcc-2	up	Autosome
WBGene00019209	H17B01.4	down	Autosome
WBGene00019217	H20J04.2	down	Autosome
WBGene00019237	H24G06.1	up	Autosome
WBGene00019247	syp-4	down	Autosome
WBGene00019249	H28G03.1	up	X
WBGene00019250	H28G03.2	up	X
WBGene00019322	ahcy-1	down	Autosome
WBGene00019327	zip-2	up	Autosome
WBGene00019344	K02G10.1	up	X
WBGene00019362	cdk-2	up	Autosome
WBGene00019427	atg-16.2	up	Autosome
WBGene00019433	acdh-3	down	Autosome
WBGene00019456	K06H7.2	up	Autosome
WBGene00019490	K07E3.1	up	X
WBGene00019510	K07H8.10	down	Autosome
WBGene00019511	K08A2.1	up	Autosome
WBGene00019513	K08A2.4	up	Autosome
WBGene00019554	K09C4.10	up	X
WBGene00019578	K09E3.7	up	X
WBGene00019598	K09H9.7	down	Autosome
WBGene00019611	K10B3.5	up	X
WBGene00019620	fah-1	up	X
WBGene00019657	K11G12.6	up	X
WBGene00019729	M02D8.3	up	X
WBGene00019733	M02E1.1	up	X
WBGene00019760	calu-1	up	X
WBGene00019763	galt-1	up	Autosome
WBGene00019795	M151.3	up	Autosome
WBGene00019796	M151.4	up	Autosome
WBGene00019799	M151.7	up	Autosome
WBGene00019828	R02E12.4	up	X
WBGene00019830	hrg-1	up	X
WBGene00019848	R03G5.7	up	X
WBGene00019854	R03H10.1	up	Autosome
WBGene00019858	R03H10.6	up	Autosome
WBGene00019863	R04A9.3	up	X
WBGene00019864	R04A9.5	up	X
WBGene00019871	R04E5.8	up	X
WBGene00019872	R04E5.9	up	X
WBGene00019875	mca-2	up	Autosome
WBGene00019906	R05G9R.1	up	Autosome
WBGene00019937	R07E4.3	up	X
WBGene00019938	R07E4.5	up	X
WBGene00019946	R08C7.2	down	Autosome
WBGene00019959	R08E3.3	up	X
WBGene00019987	R09F10.3	up	X
WBGene00020003	R11E3.1	up	Autosome
WBGene00020011	R11G1.2	up	X
WBGene00020183	T03D3.5	up	Autosome
WBGene00020197	T03G11.4	up	X
WBGene00020199	T03G11.6	up	X
WBGene00020207	T04B8.5	up	Autosome
WBGene00020214	T04G9.1	up	X
WBGene00020216	trap-2	up	X
WBGene00020235	T05A12.4	up	Autosome
WBGene00020274	T05H4.11	down	Autosome
WBGene00020297	T07A9.9	down	Autosome
WBGene00020315	T07E3.4	up	Autosome
WBGene00020317	pdf-1	up	Autosome
WBGene00020322	T07F12.2	up	X
WBGene00020334	atg-11	up	X
WBGene00020366	acdh-10	up	X
WBGene00020457	fbxa-67	up	Autosome
WBGene00020486	T13C5.6	up	X
WBGene00020496	spat-3	up	X
WBGene00020507	vha-15	up	X
WBGene00020508	T14F9.2	up	X
WBGene00020510	T14G11.1	up	X
WBGene00020511	immt-1	up	X
WBGene00020592	ugt-12	up	Autosome
WBGene00020596	oga-1	up	X
WBGene00020625	T20F5.3	up	Autosome
WBGene00020630	T20F7.1	up	X
WBGene00020633	aakg-2	up	X
WBGene00020673	T22B7.4	up	X
WBGene00020693	T22E7.1	up	Autosome
WBGene00020757	ucr-2.3	down	Autosome
WBGene00020812	acdh-7	up	X
WBGene00020838	T27A3.1	up	Autosome
WBGene00020866	T27F7.1	down	Autosome
WBGene00020883	fbxa-64	up	Autosome
WBGene00020894	T28D9.1	down	Autosome
WBGene00020904	T28F12.1	up	Autosome
WBGene00020915	nol-5	down	Autosome
WBGene00020950	W02F12.5	down	Autosome
WBGene00020967	W03A5.2	up	Autosome
WBGene00020977	oac-52	up	Autosome
WBGene00021040	W05G11.2	down	Autosome
WBGene00021048	W05H9.1	up	X
WBGene00021049	W05H9.2	up	X
WBGene00021051	W05H9.4	up	X
WBGene00021081	W08A12.4	up	Autosome
WBGene00021088	W08E12.7	down	Autosome
WBGene00021097	cdc-37	down	Autosome
WBGene00021103	eri-3	down	Autosome
WBGene00021110	W09C3.2	up	Autosome
WBGene00021159	Y4C6B.5	up	Autosome
WBGene00021186	Y9D1A.1	up	Autosome
WBGene00021294	Y25C1A.7	down	Autosome
WBGene00021296	Y25C1A.13	up	Autosome
WBGene00021319	Y34B4A.2	up	X
WBGene00021323	Y34B4A.7	up	X
WBGene00021324	Y34B4A.8	up	X
WBGene00021334	vps-4	down	Autosome
WBGene00021348	moag-4	down	Autosome
WBGene00021350	Y37E3.8	down	Autosome
WBGene00021351	Y37E3.10	down	Autosome
WBGene00021374	Y37E11B.1	down	Autosome
WBGene00021424	Y38F2AR.6	up	Autosome
WBGene00021469	Y39G10AR.11	down	Autosome
WBGene00021474	Y39G10AR.18	down	Autosome
WBGene00021485	Y40A1A.3	up	X
WBGene00021486	lbp-9	down	Autosome
WBGene00021492	Y40B10A.7	up	Autosome
WBGene00021562	nuo-5	down	Autosome
WBGene00021603	clec-204	up	Autosome
WBGene00021605	Y46H3C.5	up	Autosome
WBGene00021637	Y47G6A.7	up	Autosome
WBGene00021654	Y47G7B.2	up	Autosome
WBGene00021685	Y48G8AL.1	down	Autosome
WBGene00021689	Y48G8AL.10	down	Autosome
WBGene00021704	Y48G9A.11	down	Autosome
WBGene00021715	Y49F6B.2	down	Autosome
WBGene00021721	Y49F6B.9	down	Autosome
WBGene00021785	Y51H7C.7	down	Autosome
WBGene00021789	nol-6	down	Autosome
WBGene00021854	Y54F10AR.1	down	Autosome
WBGene00021858	Y54F10BM.3	down	Autosome
WBGene00021870	Y54G2A.4	up	Autosome
WBGene00021872	clec-85	up	Autosome
WBGene00021903	Y55B1AL.1	up	Autosome
WBGene00021925	immp-2	down	Autosome
WBGene00022010	catp-7	up	Autosome
WBGene00022046	Y66H1A.4	down	Autosome
WBGene00022052	Y67D2.2	down	Autosome
WBGene00022188	Y71H2AR.1	down	Autosome
WBGene00022203	Y73B3A.1	down	X
WBGene00022235	sqd-1	down	Autosome
WBGene00022252	Y73B6BL.31	up	Autosome
WBGene00022257	puf-11	down	Autosome
WBGene00022277	Y74C9A.3	down	Autosome
WBGene00022279	sesn-1	up	Autosome
WBGene00022297	Y76B12C.3	down	Autosome
WBGene00022304	Y76G2A.1	down	Autosome
WBGene00022310	Y77E11A.7	down	Autosome
WBGene00022348	Y82E9BR.16	down	Autosome
WBGene00022399	Y97E10AR.4	down	Autosome
WBGene00022401	Y97E10AR.6	down	Autosome
WBGene00022458	Y110A7A.8	down	Autosome
WBGene00022462	Y110A7A.15	down	Autosome
WBGene00022475	Y119C1B.10	up	Autosome
WBGene00022500	lfi-1	up	X
WBGene00022501	ZC8.6	up	X
WBGene00022502	ZC13.1	up	X
WBGene00022505	ZC21.3	down	Autosome
WBGene00022554	ZC204.2	up	Autosome
WBGene00022613	ZC449.3	up	X
WBGene00022626	ZC513.1	up	Autosome
WBGene00022647	ZK54.1	up	X
WBGene00022666	ZK154.4	up	X
WBGene00022667	ZK154.5	up	X
WBGene00022668	ZK154.6	up	X
WBGene00022769	ZK563.5	up	X
WBGene00022803	ZK688.9	down	Autosome
WBGene00022805	nhr-256	up	Autosome
WBGene00022847	ZK1055.6	up	Autosome
WBGene00023405	sor-1	up	Autosome
WBGene00023498	lin-15A	up	X
WBGene00044005	F37C12.18	up	Autosome
WBGene00044020	ZK856.14	up	Autosome
WBGene00044062	snb-6	up	Autosome
WBGene00044071	tag-233	up	X
WBGene00044134	D1025.10	up	X
WBGene00044443	ZC21.10	up	Autosome
WBGene00044495	Y54G2A.40	up	Autosome
WBGene00044690	M02B7.7	down	Autosome
WBGene00044784	F13H10.8	down	Autosome
WBGene00044989	Y37A1B.17	up	Autosome
WBGene00045078	C46C2.7	down	Autosome
WBGene00045272	F59C12.4	down	X
WBGene00045291	F23D12.10	up	X
WBGene00045392	F26D11.12	up	Autosome
WBGene00045401	T26F2.3	up	Autosome
WBGene00045435	Y34B4A.11	up	X
WBGene00045495	F11C1.7	up	X
WBGene00045507	F10A3.17	up	Autosome
WBGene00045511	F11A5.18	up	Autosome
WBGene00050944	C14A11.9	up	X
WBGene00077749	D1046.7	down	Autosome
WBGene00138721	C54D10.14	up	Autosome
WBGene00194679	T26C11.9	up	X

## Sheet: mes-3 vs wt EGCs
Wormbase_ID	Public_ID	change_mutant_vs_wt	X_vs_Autosome
WBGene00000003	aat-2	up	Autosome
WBGene00000040	aco-1	up	X
WBGene00000068	acy-1	up	Autosome
WBGene00000070	acy-3	up	Autosome
WBGene00000074	adm-2	up	X
WBGene00000075	adm-4	up	X
WBGene00000092	ags-3	up	X
WBGene00000105	alg-1	up	X
WBGene00000106	alg-2	up	Autosome
WBGene00000112	alh-6	down	Autosome
WBGene00000120	aly-1	up	Autosome
WBGene00000137	amx-1	up	Autosome
WBGene00000140	anc-1	up	Autosome
WBGene00000157	aps-2	up	X
WBGene00000161	apa-2	up	X
WBGene00000164	apm-3	up	X
WBGene00000175	aqp-7	up	X
WBGene00000178	aqp-10	up	Autosome
WBGene00000180	arc-1	up	Autosome
WBGene00000189	arl-5	down	Autosome
WBGene00000190	arf-1.1	up	Autosome
WBGene00000195	arr-1	up	X
WBGene00000207	asb-2	up	X
WBGene00000210	asg-2	up	X
WBGene00000222	atf-6	up	X
WBGene00000229	atp-2	down	Autosome
WBGene00000245	bca-1	up	X
WBGene00000262	bra-1	up	X
WBGene00000266	bre-1	up	Autosome
WBGene00000277	cab-1	down	X
WBGene00000289	cam-1	up	Autosome
WBGene00000294	cas-1	up	X
WBGene00000298	cat-4	up	Autosome
WBGene00000301	cav-1	up	Autosome
WBGene00000368	ccb-1	up	Autosome
WBGene00000380	cct-5	down	Autosome
WBGene00000386	cdc-25.1	down	Autosome
WBGene00000393	cdf-1	up	X
WBGene00000396	cdh-4	up	Autosome
WBGene00000397	cdh-5	up	Autosome
WBGene00000403	casy-1	up	Autosome
WBGene00000413	cdt-1	down	Autosome
WBGene00000444	ceh-21	up	X
WBGene00000460	ceh-39	up	X
WBGene00000462	ceh-41	up	X
WBGene00000474	cey-3	down	Autosome
WBGene00000479	cgh-1	down	Autosome
WBGene00000482	chd-3	up	X
WBGene00000511	ckb-1	up	Autosome
WBGene00000516	cki-1	up	Autosome
WBGene00000535	cpi-1	up	Autosome
WBGene00000547	clp-7	down	Autosome
WBGene00000550	clu-1	down	Autosome
WBGene00000562	cng-1	up	Autosome
WBGene00000591	coh-1	up	X
WBGene00000639	col-63	up	Autosome
WBGene00000728	col-155	up	Autosome
WBGene00000731	col-158	up	Autosome
WBGene00000776	cpl-1	down	Autosome
WBGene00000786	cpr-6	down	X
WBGene00000792	crb-1	up	X
WBGene00000797	crn-4	up	X
WBGene00000803	csb-1	up	X
WBGene00000833	cts-1	down	Autosome
WBGene00000883	cyn-7	down	Autosome
WBGene00000884	cyn-8	up	X
WBGene00000897	daf-1	up	Autosome
WBGene00000898	daf-2	down	Autosome
WBGene00000906	daf-10	up	Autosome
WBGene00000929	dao-3	up	X
WBGene00000931	dao-5	down	Autosome
WBGene00000959	dgk-2	up	X
WBGene00000980	dhs-17	up	Autosome
WBGene00001000	dim-1	up	X
WBGene00001025	dnj-7	up	X
WBGene00001030	dnj-12	up	Autosome
WBGene00001032	dnj-14	up	X
WBGene00001081	dpy-22	up	X
WBGene00001082	dpy-23	up	X
WBGene00001086	dpy-27	up	Autosome
WBGene00001105	dsl-3	up	Autosome
WBGene00001130	dyn-1	up	X
WBGene00001137	eat-6	down	Autosome
WBGene00001167	eef-2	down	Autosome
WBGene00001168	eef-1A.1	down	Autosome
WBGene00001169	eef-1A.2	up	X
WBGene00001170	egl-1	up	Autosome
WBGene00001172	egl-3	up	Autosome
WBGene00001175	egl-6	up	X
WBGene00001177	egl-8	up	Autosome
WBGene00001178	egl-9	up	Autosome
WBGene00001209	egl-45	down	Autosome
WBGene00001225	eif-3.B	down	Autosome
WBGene00001228	eif-3.E	down	Autosome
WBGene00001325	eor-2	up	X
WBGene00001329	epn-1	up	X
WBGene00001330	eps-8	up	Autosome
WBGene00001331	erd-2	up	X
WBGene00001336	qars-1	down	Autosome
WBGene00001337	ears-1	down	Autosome
WBGene00001394	fat-2	up	Autosome
WBGene00001406	fce-2	down	Autosome
WBGene00001425	fis-2	up	X
WBGene00001451	flp-8	up	X
WBGene00001452	flp-9	down	Autosome
WBGene00001468	flr-4	up	X
WBGene00001489	frm-2	up	Autosome
WBGene00001502	ftt-2	up	X
WBGene00001516	gap-2	up	X
WBGene00001520	gas-1	up	X
WBGene00001558	gdi-1	up	Autosome
WBGene00001562	lin-66	up	Autosome
WBGene00001565	gei-8	up	Autosome
WBGene00001569	gei-12	up	X
WBGene00001579	gex-2	up	Autosome
WBGene00001583	gfi-3	up	X
WBGene00001595	gld-1	down	Autosome
WBGene00001602	gln-1	up	X
WBGene00001617	glr-6	up	X
WBGene00001637	gly-12	up	X
WBGene00001638	gly-13	up	X
WBGene00001649	gob-1	up	X
WBGene00001651	gon-2	up	Autosome
WBGene00001663	gpa-1	up	Autosome
WBGene00001685	gpd-3	up	X
WBGene00001708	grk-1	up	X
WBGene00001744	gars-1	down	Autosome
WBGene00001748	gsp-2	down	Autosome
WBGene00001755	gst-7	up	Autosome
WBGene00001786	gst-38	up	Autosome
WBGene00001794	gta-1	up	Autosome
WBGene00001824	hbl-1	up	X
WBGene00001844	hid-1	up	X
WBGene00001851	hif-1	up	Autosome
WBGene00001854	hil-3	up	X
WBGene00001860	him-1	down	Autosome
WBGene00001872	him-14	down	Autosome
WBGene00001898	his-24	up	X
WBGene00001915	his-41	up	Autosome
WBGene00001916	his-42	up	Autosome
WBGene00001972	hmg-1.2	up	Autosome
WBGene00001978	hmp-1	up	Autosome
WBGene00001994	hpk-1	up	X
WBGene00001997	hpr-9	down	Autosome
WBGene00002007	hsp-3	up	X
WBGene00002023	hsp-25	up	X
WBGene00002024	hsp-43	down	X
WBGene00002029	hst-2	up	X
WBGene00002031	hst-6	up	X
WBGene00002044	hyl-2	up	X
WBGene00002059	ife-1	down	Autosome
WBGene00002060	ife-2	up	X
WBGene00002063	ife-5	up	Autosome
WBGene00002064	iff-1	down	Autosome
WBGene00002066	ifg-1	down	Autosome
WBGene00002077	imb-3	down	Autosome
WBGene00002124	inx-2	up	X
WBGene00002125	inx-3	up	X
WBGene00002152	iars-1	down	Autosome
WBGene00002203	kin-20	up	X
WBGene00002207	kin-25	up	X
WBGene00002215	klc-2	up	Autosome
WBGene00002220	klp-8	up	X
WBGene00002229	klp-19	down	Autosome
WBGene00002238	kars-1	down	Autosome
WBGene00002262	ldh-1	up	Autosome
WBGene00002295	let-19	up	Autosome
WBGene00002632	let-413	up	Autosome
WBGene00002850	let-716	down	Autosome
WBGene00002985	lig-1	down	Autosome
WBGene00002997	lin-8	down	Autosome
WBGene00003052	lmn-1	down	Autosome
WBGene00003053	lmp-1	up	X
WBGene00003061	lpd-5	up	Autosome
WBGene00003083	lst-1	down	Autosome
WBGene00003084	lst-2	up	X
WBGene00003087	lsy-2	up	X
WBGene00003111	mab-20	up	Autosome
WBGene00003119	mac-1	down	Autosome
WBGene00003134	mat-3	down	Autosome
WBGene00003149	mbk-1	up	X
WBGene00003156	mcm-4	down	Autosome
WBGene00003171	mec-7	up	X
WBGene00003185	mek-1	up	X
WBGene00003210	mel-28	down	Autosome
WBGene00003219	mes-1	up	X
WBGene00003235	mif-2	up	Autosome
WBGene00003239	mig-2	up	X
WBGene00003246	mig-14	down	Autosome
WBGene00003371	mlc-3	down	Autosome
WBGene00003378	mml-1	up	Autosome
WBGene00003394	mom-1	up	X
WBGene00003409	mrp-3	up	X
WBGene00003410	mrp-4	up	X
WBGene00003411	mrp-5	up	X
WBGene00003412	mrp-6	up	X
WBGene00003413	mrp-7	down	Autosome
WBGene00003422	msh-6	down	Autosome
WBGene00003477	mtm-5	up	X
WBGene00003482	mua-3	down	Autosome
WBGene00003517	nac-1	up	X
WBGene00003531	nas-12	up	Autosome
WBGene00003600	nhr-1	up	X
WBGene00003612	nhr-13	up	Autosome
WBGene00003616	nhr-17	up	X
WBGene00003621	nhr-22	up	Autosome
WBGene00003638	nhr-48	up	X
WBGene00003661	nhr-71	up	X
WBGene00003695	nhr-105	up	Autosome
WBGene00003733	nhx-5	up	X
WBGene00003759	nlp-21	down	Autosome
WBGene00003777	nmy-2	down	Autosome
WBGene00003870	ooc-5	up	Autosome
WBGene00003883	osm-1	up	X
WBGene00003903	pab-2	up	X
WBGene00003911	pak-1	up	X
WBGene00003914	pam-1	down	Autosome
WBGene00003915	pan-1	up	Autosome
WBGene00003917	par-2	down	Autosome
WBGene00003931	pat-4	up	Autosome
WBGene00003932	pat-6	up	Autosome
WBGene00003963	pdi-2	up	X
WBGene00003970	pek-1	up	X
WBGene00004035	pkd-2	up	Autosome
WBGene00004038	plc-3	up	Autosome
WBGene00004053	pme-5	up	Autosome
WBGene00004089	ppk-3	up	X
WBGene00004094	ppw-2	down	Autosome
WBGene00004131	pqn-44	up	Autosome
WBGene00004148	pqn-65	up	X
WBGene00004182	prk-1	up	Autosome
WBGene00004185	pro-1	down	Autosome
WBGene00004187	prp-8	down	Autosome
WBGene00004203	psa-1	down	Autosome
WBGene00004210	ptc-3	up	Autosome
WBGene00004245	puf-9	up	X
WBGene00004276	rab-14	up	X
WBGene00004296	rad-50	down	Autosome
WBGene00004304	ran-3	down	Autosome
WBGene00004313	rbc-1	up	X
WBGene00004317	rbg-1	up	X
WBGene00004354	rgs-11	up	X
WBGene00004356	rhi-1	up	X
WBGene00004377	rme-6	up	X
WBGene00004413	rpl-2	down	Autosome
WBGene00004423	rpl-11.2	up	X
WBGene00004432	rpl-20	down	Autosome
WBGene00004438	rpl-25.1	up	X
WBGene00004445	rpl-31	down	Autosome
WBGene00004482	rps-13	down	Autosome
WBGene00004507	rpy-1	down	Autosome
WBGene00004509	rrf-2	up	Autosome
WBGene00004682	rsd-3	up	X
WBGene00004727	sax-1	up	X
WBGene00004729	sax-3	up	X
WBGene00004745	sdc-1	up	X
WBGene00004758	sek-1	up	X
WBGene00004769	sel-12	up	X
WBGene00004774	sem-5	up	X
WBGene00004788	sft-4	up	X
WBGene00004809	skr-3	up	Autosome
WBGene00004822	skr-16	up	Autosome
WBGene00004829	sli-1	up	X
WBGene00004855	sma-1	up	Autosome
WBGene00004857	sma-3	up	Autosome
WBGene00004858	sma-4	up	Autosome
WBGene00004862	sma-9	up	X
WBGene00004876	smf-1	up	X
WBGene00004893	sms-2	up	X
WBGene00004927	snx-1	up	X
WBGene00004951	spc-1	up	X
WBGene00004955	spd-5	down	Autosome
WBGene00004976	spe-41	up	Autosome
WBGene00005008	spr-3	up	X
WBGene00005573	sri-61	up	Autosome
WBGene00006063	sto-1	up	X
WBGene00006066	sto-4	up	X
WBGene00006351	sur-5	up	X
WBGene00006369	sym-4	up	X
WBGene00006371	syx-3	up	X
WBGene00006377	syp-3	up	Autosome
WBGene00006394	taf-11.2	up	Autosome
WBGene00006410	nck-1	up	X
WBGene00006416	sams-5	up	Autosome
WBGene00006431	tag-52	up	X
WBGene00006432	tag-53	up	X
WBGene00006439	ant-1.1	down	Autosome
WBGene00006472	tag-123	up	X
WBGene00006477	tag-130	up	X
WBGene00006479	tmbi-4	up	X
WBGene00006491	acl-3	down	Autosome
WBGene00006493	tag-147	up	X
WBGene00006494	hke-4.2	up	X
WBGene00006496	cgef-1	up	X
WBGene00006504	kcc-1	up	Autosome
WBGene00006517	tag-172	up	X
WBGene00006524	tap-1	up	X
WBGene00006529	tba-2	down	Autosome
WBGene00006536	tbb-1	down	Autosome
WBGene00006537	tbb-2	down	Autosome
WBGene00006539	tbb-6	up	Autosome
WBGene00006561	tcl-2	down	Autosome
WBGene00006578	tli-1	up	Autosome
WBGene00006595	top-1	down	Autosome
WBGene00006602	tps-1	up	X
WBGene00006603	tps-2	up	Autosome
WBGene00006613	trm-1	down	Autosome
WBGene00006619	try-1	up	Autosome
WBGene00006753	unc-14	up	Autosome
WBGene00006757	unc-18	up	X
WBGene00006769	unc-33	up	Autosome
WBGene00006781	unc-45	down	Autosome
WBGene00006785	unc-50	up	Autosome
WBGene00006786	unc-51	up	Autosome
WBGene00006810	unc-78	up	X
WBGene00006816	unc-84	up	X
WBGene00006822	unc-93	down	Autosome
WBGene00006836	unc-112	up	Autosome
WBGene00006839	unc-115	up	X
WBGene00006874	vab-8	up	Autosome
WBGene00006876	vab-10	up	Autosome
WBGene00006888	vbh-1	down	Autosome
WBGene00006890	vem-1	up	X
WBGene00006921	vha-12	up	X
WBGene00006922	vhl-1	up	X
WBGene00006923	vhp-1	up	Autosome
WBGene00006924	vig-1	down	Autosome
WBGene00006959	xbp-1	up	Autosome
WBGene00006994	zyg-9	down	Autosome
WBGene00007011	mdt-1.2	up	X
WBGene00007053	tag-192	up	Autosome
WBGene00007058	dmd-6	up	Autosome
WBGene00007059	vps-52	up	X
WBGene00007091	B0001.6	up	Autosome
WBGene00007106	B0035.3	down	Autosome
WBGene00007111	B0035.12	down	Autosome
WBGene00007129	B0272.3	up	X
WBGene00007132	B0284.2	up	Autosome
WBGene00007170	B0393.5	down	Autosome
WBGene00007267	C03A3.2	up	X
WBGene00007287	gck-4	up	X
WBGene00007297	C04F12.1	up	Autosome
WBGene00007348	C05G5.2	up	X
WBGene00007349	C05G5.3	up	X
WBGene00007350	C05G5.4	up	X
WBGene00007363	stdh-1	up	Autosome
WBGene00007388	folt-1	up	Autosome
WBGene00007513	wht-2	down	Autosome
WBGene00007524	C11G6.3	up	X
WBGene00007574	C14B1.3	up	Autosome
WBGene00007624	C16C10.3	down	Autosome
WBGene00007651	nra-3	up	X
WBGene00007668	C18B12.6	up	X
WBGene00007698	qns-1	down	Autosome
WBGene00007750	syg-2	up	X
WBGene00007756	C27A7.5	up	Autosome
WBGene00007766	C27C7.1	up	Autosome
WBGene00007773	C27C12.3	up	X
WBGene00007774	C27C12.4	up	X
WBGene00007784	ruvb-1	down	Autosome
WBGene00007785	C27H6.3	down	Autosome
WBGene00007846	C31E10.5	up	X
WBGene00007847	C31E10.6	up	X
WBGene00007848	C31E10.7	up	X
WBGene00007849	tbc-19	up	X
WBGene00007878	C33A11.2	up	X
WBGene00007892	C33B4.4	up	Autosome
WBGene00007900	C33D9.6	up	Autosome
WBGene00007916	C34C6.3	up	Autosome
WBGene00007941	C34F6.7	up	X
WBGene00007942	idh-2	up	X
WBGene00007943	C34F6.9	up	X
WBGene00007955	C35C5.3	up	X
WBGene00007956	C35C5.6	up	X
WBGene00007966	C36A4.5	down	Autosome
WBGene00007976	C36B1.9	up	Autosome
WBGene00007993	C37E2.1	up	X
WBGene00008003	C38D4.1	down	Autosome
WBGene00008080	C44B9.3	down	Autosome
WBGene00008085	C44C10.4	up	X
WBGene00008094	C44H4.4	up	X
WBGene00008110	C46C2.2	up	Autosome
WBGene00008210	C49F5.6	up	X
WBGene00008258	C52E4.5	up	Autosome
WBGene00008302	C54D10.8	up	Autosome
WBGene00008353	D1025.1	up	X
WBGene00008389	D1086.2	up	Autosome
WBGene00008554	F07C6.3	up	Autosome
WBGene00008576	F08G2.4	up	Autosome
WBGene00008579	F08G2.8	up	Autosome
WBGene00008585	F08G12.1	up	X
WBGene00008586	F08G12.2	up	X
WBGene00008587	F08G12.3	up	X
WBGene00008591	F08H9.3	up	Autosome
WBGene00008681	scrm-4	down	Autosome
WBGene00008690	F11C1.1	up	X
WBGene00008691	mff-1	up	X
WBGene00008694	F11C1.5	up	X
WBGene00008745	F13E6.1	up	X
WBGene00008749	F13E6.5	up	X
WBGene00008803	lips-10	down	Autosome
WBGene00008805	git-1	up	X
WBGene00008806	mboa-7	up	X
WBGene00008880	F16B12.4	up	X
WBGene00008882	F16B12.6	up	X
WBGene00008884	nhr-281	up	X
WBGene00008915	F17C11.4	up	Autosome
WBGene00008920	eef-1G	down	Autosome
WBGene00008924	F17E5.2	up	X
WBGene00008927	F17H10.3	up	X
WBGene00008939	F18H3.1	up	X
WBGene00008940	F18H3.4	up	X
WBGene00008951	F19C6.2	up	X
WBGene00008970	F20C5.5	up	Autosome
WBGene00008971	F20C5.6	up	Autosome
WBGene00008973	F20D1.1	up	X
WBGene00008974	tbc-1	up	X
WBGene00008975	F20D1.3	up	X
WBGene00008977	F20D1.7	up	X
WBGene00008979	F20D1.9	up	X
WBGene00008980	tag-299	up	X
WBGene00008986	F20G2.2	up	Autosome
WBGene00008995	F21A3.5	down	Autosome
WBGene00008999	F21A10.2	up	X
WBGene00009027	F21G4.6	up	X
WBGene00009113	F25D7.4	down	Autosome
WBGene00009119	F25H2.5	down	Autosome
WBGene00009124	rtel-1	down	Autosome
WBGene00009135	F25H9.2	up	Autosome
WBGene00009137	bath-39	up	Autosome
WBGene00009182	F26H11.4	down	Autosome
WBGene00009216	F28D1.6	up	Autosome
WBGene00009218	acs-20	up	Autosome
WBGene00009233	F28H6.4	up	X
WBGene00009267	usp-48	down	Autosome
WBGene00009280	F31B9.3	up	X
WBGene00009286	F31C3.4	down	Autosome
WBGene00009301	F31F6.2	up	X
WBGene00009318	F32B4.8	down	Autosome
WBGene00009390	F35C5.1	up	Autosome
WBGene00009412	F35E2.5	up	Autosome
WBGene00009552	piki-1	up	X
WBGene00009561	F39D8.3	up	X
WBGene00009635	F42F12.3	up	X
WBGene00009674	nucb-1	up	X
WBGene00009691	F44E5.4	up	Autosome
WBGene00009692	F44E5.5	up	Autosome
WBGene00009702	F44F4.3	down	Autosome
WBGene00009726	tbc-13	up	X
WBGene00009730	F45G2.2	up	Autosome
WBGene00009793	pkn-1	up	X
WBGene00009801	F47A4.5	up	X
WBGene00009812	F47B10.1	up	X
WBGene00009888	F49E2.5	up	X
WBGene00009923	F52B5.7	up	Autosome
WBGene00009926	noah-2	down	Autosome
WBGene00009930	F52D10.2	up	X
WBGene00009945	bath-38	up	Autosome
WBGene00009973	F53C11.3	up	Autosome
WBGene00009976	swan-2	up	Autosome
WBGene00009988	F53F4.4	up	Autosome
WBGene00010009	F53H4.4	up	X
WBGene00010011	F53H4.6	up	X
WBGene00010031	F54B11.8	up	X
WBGene00010051	F54D5.5	up	Autosome
WBGene00010053	F54D5.9	down	Autosome
WBGene00010066	F54F7.6	up	X
WBGene00010092	F55C5.2	up	Autosome
WBGene00010110	F55D12.1	up	Autosome
WBGene00010177	F57A8.1	up	Autosome
WBGene00010199	bet-2	up	X
WBGene00010204	F57F5.1	up	Autosome
WBGene00010234	ttr-50	up	Autosome
WBGene00010241	F58D2.2	up	Autosome
WBGene00010269	F58G1.7	up	Autosome
WBGene00010310	F59B2.8	up	Autosome
WBGene00010332	F59D12.5	up	X
WBGene00010336	F59F4.1	up	X
WBGene00010338	F59F4.3	up	X
WBGene00010339	acl-1	up	X
WBGene00010397	H13N06.4	up	X
WBGene00010419	H28O16.1	down	Autosome
WBGene00010428	dcn-1	up	Autosome
WBGene00010433	H40L08.1	up	X
WBGene00010434	H40L08.3	up	X
WBGene00010492	meg-1	up	X
WBGene00010493	meg-2	up	X
WBGene00010552	K04C1.2	up	X
WBGene00010558	K04D7.4	up	Autosome
WBGene00010568	K04G2.10	up	Autosome
WBGene00010572	wdr-5.2	up	X
WBGene00010582	K05C4.5	down	Autosome
WBGene00010627	K07C5.4	down	Autosome
WBGene00010642	K07G5.3	up	Autosome
WBGene00010645	K07G5.6	down	Autosome
WBGene00010700	nipi-3	up	X
WBGene00010701	ent-2	up	X
WBGene00010702	usp-33	up	X
WBGene00010708	K09A11.5	up	X
WBGene00010724	K09E9.1	up	X
WBGene00010725	erv-46	up	X
WBGene00010726	K09E9.3	up	X
WBGene00010776	pix-1	up	X
WBGene00010785	top-2	down	Autosome
WBGene00010836	M03B6.4	up	X
WBGene00010843	M03C11.6	down	Autosome
WBGene00010896	M28.5	down	Autosome
WBGene00010981	R03A10.1	up	X
WBGene00010984	nkat-3	up	X
WBGene00010993	R03E1.2	up	X
WBGene00011010	R04D3.2	up	X
WBGene00011012	R04D3.4	up	X
WBGene00011139	R08B4.3	up	X
WBGene00011152	R09A8.1	up	X
WBGene00011153	R09A8.2	up	X
WBGene00011155	R09B3.2	down	Autosome
WBGene00011199	tag-310	up	Autosome
WBGene00011231	R11A5.3	up	Autosome
WBGene00011235	R11A5.7	up	Autosome
WBGene00011236	R11A8.1	up	Autosome
WBGene00011238	ugt-59	down	Autosome
WBGene00011282	R74.8	down	Autosome
WBGene00011291	R102.4	up	Autosome
WBGene00011305	R186.1	up	Autosome
WBGene00011343	T01G9.1	down	Autosome
WBGene00011349	T01H3.3	down	Autosome
WBGene00011398	qdpr-1	up	Autosome
WBGene00011408	T04A8.6	down	Autosome
WBGene00011440	sfxn-1.5	up	X
WBGene00011441	T04F8.2	up	X
WBGene00011446	T04F8.8	up	X
WBGene00011498	T05G5.1	up	Autosome
WBGene00011522	T06D8.1	up	Autosome
WBGene00011524	T06D8.3	up	Autosome
WBGene00011532	T06D10.2	down	Autosome
WBGene00011560	T07C4.3	down	Autosome
WBGene00011562	T07C4.10	down	Autosome
WBGene00011572	T07C12.8	down	Autosome
WBGene00011614	nfya-1	up	X
WBGene00011615	lsd-1	up	X
WBGene00011624	T08G5.3	up	Autosome
WBGene00011645	T09B9.4	up	X
WBGene00011679	ucr-2.2	up	X
WBGene00011680	T10B10.3	up	X
WBGene00011691	T10C6.10	up	Autosome
WBGene00011717	T11G6.2	up	Autosome
WBGene00011737	T12G3.1	up	Autosome
WBGene00011759	T13H5.5	down	Autosome
WBGene00011760	T13H5.6	up	Autosome
WBGene00011771	T14G8.3	up	X
WBGene00011802	T16G1.9	up	Autosome
WBGene00011805	T16G12.4	up	Autosome
WBGene00011820	T18D3.1	up	X
WBGene00011839	T19C4.5	up	Autosome
WBGene00011932	sptl-3	up	Autosome
WBGene00011940	T23B5.3	down	Autosome
WBGene00011964	T23G5.6	up	Autosome
WBGene00011977	T24B8.3	up	Autosome
WBGene00011990	T24D5.2	up	X
WBGene00011995	T24F1.3	up	Autosome
WBGene00012002	T24H10.4	down	Autosome
WBGene00012073	T27A8.1	up	X
WBGene00012088	T27E7.3	up	Autosome
WBGene00012100	T27F2.2	up	Autosome
WBGene00012121	T28C6.7	up	Autosome
WBGene00012136	T28F4.1	up	Autosome
WBGene00012155	VW02B12L.2	up	Autosome
WBGene00012158	ucr-2.1	up	X
WBGene00012198	W02B8.2	up	Autosome
WBGene00012255	lpr-6	down	X
WBGene00012257	lpr-4	down	X
WBGene00012258	W04G3.5	up	X
WBGene00012295	W06B3.1	up	X
WBGene00012299	W06D11.1	up	X
WBGene00012315	immt-2	down	Autosome
WBGene00012326	W07E11.1	up	X
WBGene00012343	W08E3.2	up	Autosome
WBGene00012407	Y7A5A.1	up	X
WBGene00012436	flh-3	up	Autosome
WBGene00012462	Y17G7B.8	down	Autosome
WBGene00012512	ekl-5	up	X
WBGene00012513	Y26E6A.2	up	X
WBGene00012522	Y32B12B.2	down	Autosome
WBGene00012529	Y32F6A.4	up	Autosome
WBGene00012660	Y39A1A.24	up	Autosome
WBGene00012697	Y39B6A.39	down	Autosome
WBGene00012813	Y43F8B.2	up	Autosome
WBGene00012936	Y47D3A.29	down	Autosome
WBGene00012951	Y47H9C.8	down	Autosome
WBGene00012976	sup-35	up	Autosome
WBGene00013027	Y49A3A.4	up	Autosome
WBGene00013030	Y49E10.4	down	Autosome
WBGene00013096	mcd-1	down	Autosome
WBGene00013180	cutl-10	down	Autosome
WBGene00013203	Y54E5A.8	up	Autosome
WBGene00013215	Y54G11A.4	up	Autosome
WBGene00013244	Y56A3A.33	up	Autosome
WBGene00013302	vti-1	up	Autosome
WBGene00013355	gck-3	down	Autosome
WBGene00013453	fbxa-83	up	Autosome
WBGene00013563	Y75B8A.33	up	Autosome
WBGene00013632	Y105C5A.1	up	Autosome
WBGene00013658	Y105C5B.19	up	Autosome
WBGene00013667	Y105E8A.2	down	Autosome
WBGene00013670	Y105E8A.10	down	Autosome
WBGene00013677	Y105E8A.19	down	Autosome
WBGene00013680	Y105E8A.23	down	Autosome
WBGene00013690	Y105E8B.5	down	Autosome
WBGene00013725	Y106G6H.15	down	Autosome
WBGene00013766	prmt-1	down	Autosome
WBGene00013789	Y116A8C.9	up	Autosome
WBGene00013832	ZC15.3	up	Autosome
WBGene00013917	ZC504.3	up	X
WBGene00013919	ZC506.1	up	X
WBGene00013920	pssy-1	up	X
WBGene00014033	arrd-15	down	Autosome
WBGene00014080	atg-4.2	up	Autosome
WBGene00014113	ZK856.12	down	Autosome
WBGene00014209	ZK1067.3	down	Autosome
WBGene00014259	ZK1320.11	up	Autosome
WBGene00015008	B0041.3	up	Autosome
WBGene00015116	B0286.3	down	Autosome
WBGene00015168	tag-320	up	X
WBGene00015172	B0410.3	up	X
WBGene00015180	B0416.4	up	X
WBGene00015181	B0416.5	up	X
WBGene00015219	B0507.2	up	Autosome
WBGene00015227	B0507.10	up	Autosome
WBGene00015230	tag-344	up	Autosome
WBGene00015268	BE0003N10.3	down	Autosome
WBGene00015285	C01B12.2	up	Autosome
WBGene00015313	C01G8.6	down	Autosome
WBGene00015324	C02B8.6	up	X
WBGene00015344	nra-4	up	Autosome
WBGene00015391	sdha-1	up	X
WBGene00015425	C04E6.11	down	Autosome
WBGene00015429	sor-3	up	X
WBGene00015492	lnp-1	up	X
WBGene00015514	C06A8.3	down	Autosome
WBGene00015519	C06E1.3	up	Autosome
WBGene00015538	sams-3	down	Autosome
WBGene00015552	C06G3.6	up	Autosome
WBGene00015565	C07D8.6	up	X
WBGene00015662	C10A4.1	up	X
WBGene00015668	C10A4.7	up	X
WBGene00015680	egal-1	up	Autosome
WBGene00015735	pdfr-1	up	Autosome
WBGene00015777	sfxn-2	up	X
WBGene00015778	C14F11.1	up	X
WBGene00015787	C15B12.6	up	X
WBGene00015789	syx-6	up	X
WBGene00015791	C15C7.5	up	X
WBGene00015793	C15C7.7	up	X
WBGene00015801	C15H9.5	up	X
WBGene00015822	C16B8.2	down	X
WBGene00015866	C16E9.2	up	X
WBGene00015885	fbxa-65	up	Autosome
WBGene00015910	C17F4.2	up	Autosome
WBGene00015912	fbxc-50	up	Autosome
WBGene00015922	C17H11.2	up	X
WBGene00015955	C18B2.4	up	X
WBGene00015974	C18E3.5	down	Autosome
WBGene00016010	C23G10.1	up	Autosome
WBGene00016061	C24G6.6	up	Autosome
WBGene00016072	C24H12.2	up	Autosome
WBGene00016087	C25A11.2	up	X
WBGene00016131	C26B9.1	up	X
WBGene00016138	flh-2	up	Autosome
WBGene00016151	smc-5	down	Autosome
WBGene00016188	sec-15	up	X
WBGene00016243	tag-319	down	Autosome
WBGene00016273	C30G12.1	up	Autosome
WBGene00016330	C32E12.4	up	Autosome
WBGene00016346	fbxa-120	up	X
WBGene00016395	C34B2.10	up	Autosome
WBGene00016415	C34F11.3	up	Autosome
WBGene00016438	C35B8.3	up	X
WBGene00016468	C36B7.5	up	X
WBGene00016469	C36B7.6	up	X
WBGene00016488	C36C9.5	up	X
WBGene00016489	C36E6.1	up	X
WBGene00016490	C36E6.2	up	X
WBGene00016507	C37H5.3	up	Autosome
WBGene00016508	C37H5.5	down	Autosome
WBGene00016511	C37H5.13	up	Autosome
WBGene00016574	C41H7.4	up	Autosome
WBGene00016576	C41H7.6	up	Autosome
WBGene00016592	erl-1	down	Autosome
WBGene00016606	exoc-7	down	Autosome
WBGene00016617	C43H6.4	up	X
WBGene00016620	C43H6.7	up	X
WBGene00016642	C44C1.2	up	X
WBGene00016652	C44E4.3	down	Autosome
WBGene00016661	C45B2.6	up	X
WBGene00016698	C46A5.1	up	Autosome
WBGene00016704	C46C11.1	up	X
WBGene00016716	acs-17	up	X
WBGene00016788	C49G7.10	up	Autosome
WBGene00016866	coel-1	up	X
WBGene00016867	C52B9.4	up	X
WBGene00016868	C52B9.8	up	X
WBGene00016894	C53B7.3	up	X
WBGene00016906	C53D5.5	up	Autosome
WBGene00016907	C53H9.2	down	Autosome
WBGene00016934	mboa-3	up	X
WBGene00016935	ifta-1	up	X
WBGene00016937	tag-294	up	X
WBGene00016953	C55C3.3	up	Autosome
WBGene00016968	epg-5	up	Autosome
WBGene00016984	C56G3.1	up	X
WBGene00016988	CD4.1	up	Autosome
WBGene00016995	D1005.1	up	X
WBGene00017010	D1007.15	up	Autosome
WBGene00017046	utx-1	up	X
WBGene00017050	D2024.1	up	Autosome
WBGene00017066	D2092.5	down	Autosome
WBGene00017101	E02H9.3	up	Autosome
WBGene00017177	F02E8.4	up	X
WBGene00017178	atg-16.1	up	X
WBGene00017240	F08B6.3	up	Autosome
WBGene00017244	apy-1	up	X
WBGene00017264	F08F3.8	up	Autosome
WBGene00017298	toca-1	up	X
WBGene00017310	F09G2.1	up	Autosome
WBGene00017342	F10D7.5	up	X
WBGene00017419	F13B9.1	up	X
WBGene00017423	F13C5.2	up	X
WBGene00017441	F13H8.8	up	Autosome
WBGene00017445	F14B8.2	up	X
WBGene00017532	F16H11.3	up	X
WBGene00017571	tag-279	up	X
WBGene00017582	F18G5.6	up	X
WBGene00017586	F19B10.4	up	Autosome
WBGene00017620	F20A1.9	down	Autosome
WBGene00017629	F20B6.5	up	X
WBGene00017653	F21C10.3	up	Autosome
WBGene00017728	F22H10.4	up	X
WBGene00017744	fbxc-54	up	Autosome
WBGene00017755	F23F12.9	up	Autosome
WBGene00017782	F25E5.1	up	Autosome
WBGene00017816	F26B1.2	down	Autosome
WBGene00017864	pcca-1	up	X
WBGene00017898	F28C10.3	up	X
WBGene00017939	F31A3.5	up	X
WBGene00017949	F31D5.6	up	Autosome
WBGene00017970	F32A5.4	down	Autosome
WBGene00017974	vps-41	up	X
WBGene00018037	chtl-1	up	X
WBGene00018061	arrd-19	up	Autosome
WBGene00018073	F35H10.10	up	Autosome
WBGene00018075	tbc-11	up	X
WBGene00018076	F35H12.4	up	X
WBGene00018077	F35H12.5	up	X
WBGene00018099	ztf-28	up	Autosome
WBGene00018140	F37B4.10	up	Autosome
WBGene00018164	F38A5.7	up	Autosome
WBGene00018193	F39C12.1	up	X
WBGene00018203	F39F10.3	up	X
WBGene00018230	F40E3.2	down	Autosome
WBGene00018238	F40F4.7	up	X
WBGene00018259	F41B4.3	up	X
WBGene00018310	F41G4.7	up	X
WBGene00018349	F42C5.9	up	Autosome
WBGene00018386	F43C11.9	up	Autosome
WBGene00018418	F44E2.4	down	Autosome
WBGene00018426	F44E7.4	down	Autosome
WBGene00018446	F45C12.15	up	Autosome
WBGene00018516	tag-257	up	X
WBGene00018518	F46H5.2	up	X
WBGene00018519	F46H5.3	up	X
WBGene00018520	F46H5.4	up	X
WBGene00018522	F46H5.7	up	X
WBGene00018533	F47B7.2	up	X
WBGene00018537	F47B7.6	up	X
WBGene00018577	asna-2	up	X
WBGene00018578	F47G3.3	up	X
WBGene00018593	F48B9.8	up	X
WBGene00018604	F48E3.3	up	X
WBGene00018636	F49E8.2	down	Autosome
WBGene00018657	acl-4	up	X
WBGene00018689	F52D2.7	up	X
WBGene00018701	pccb-1	up	X
WBGene00018703	sec-3	up	X
WBGene00018710	F52G3.1	up	X
WBGene00018711	F52G3.3	up	X
WBGene00018717	F52H2.5	up	X
WBGene00018719	F52H2.7	up	X
WBGene00018721	polh-1	down	Autosome
WBGene00018735	F53B1.2	up	X
WBGene00018740	tra-4	up	X
WBGene00018756	F53C3.13	down	Autosome
WBGene00018837	F54G2.1	up	X
WBGene00018838	F54G2.2	up	X
WBGene00018846	eef-1B.1	down	Autosome
WBGene00018853	sec-22	up	X
WBGene00018857	stau-1	up	X
WBGene00018878	glit-1	up	X
WBGene00018898	F55F10.1	down	Autosome
WBGene00018900	rod-1	down	Autosome
WBGene00018921	sago-2	down	Autosome
WBGene00018959	F56D1.1	down	Autosome
WBGene00018966	F56D2.5	up	Autosome
WBGene00018987	lgl-1	up	X
WBGene00019017	F57F4.4	down	Autosome
WBGene00019087	F59A6.5	down	Autosome
WBGene00019189	H11L12.1	up	X
WBGene00019207	H17B01.1	up	Autosome
WBGene00019247	syp-4	down	Autosome
WBGene00019249	H28G03.1	up	X
WBGene00019250	H28G03.2	up	X
WBGene00019344	K02G10.1	up	X
WBGene00019401	nuo-4	down	Autosome
WBGene00019408	K05F1.6	up	Autosome
WBGene00019427	atg-16.2	up	Autosome
WBGene00019458	K06H7.7	down	Autosome
WBGene00019490	K07E3.1	up	X
WBGene00019491	K07E3.2	up	X
WBGene00019510	K07H8.10	down	Autosome
WBGene00019511	K08A2.1	up	Autosome
WBGene00019554	K09C4.10	up	X
WBGene00019569	K09D9.12	up	Autosome
WBGene00019593	K09F6.10	up	Autosome
WBGene00019611	K10B3.5	up	X
WBGene00019620	fah-1	up	X
WBGene00019657	K11G12.6	up	X
WBGene00019666	sago-1	up	Autosome
WBGene00019716	M01G5.3	down	Autosome
WBGene00019729	M02D8.3	up	X
WBGene00019733	M02E1.1	up	X
WBGene00019760	calu-1	up	X
WBGene00019795	M151.3	up	Autosome
WBGene00019799	M151.7	up	Autosome
WBGene00019830	hrg-1	up	X
WBGene00019832	R02F2.2	up	Autosome
WBGene00019848	R03G5.7	up	X
WBGene00019858	R03H10.6	up	Autosome
WBGene00019863	R04A9.3	up	X
WBGene00019864	R04A9.5	up	X
WBGene00019871	R04E5.8	up	X
WBGene00019872	R04E5.9	up	X
WBGene00019918	fbxc-36	up	Autosome
WBGene00019937	R07E4.3	up	X
WBGene00019938	R07E4.5	up	X
WBGene00019959	R08E3.3	up	X
WBGene00019980	R09B5.12	down	Autosome
WBGene00019987	R09F10.3	up	X
WBGene00019989	R09F10.8	up	X
WBGene00019997	R10F2.6	down	Autosome
WBGene00020003	R11E3.1	up	Autosome
WBGene00020006	set-15	up	Autosome
WBGene00020011	R11G1.2	up	X
WBGene00020018	R12B2.2	up	Autosome
WBGene00020090	R119.5	up	Autosome
WBGene00020097	larp-1	down	Autosome
WBGene00020099	R144.11	down	Autosome
WBGene00020142	aak-2	up	X
WBGene00020160	igcm-3	up	X
WBGene00020183	T03D3.5	up	Autosome
WBGene00020199	T03G11.6	up	X
WBGene00020216	trap-2	up	X
WBGene00020235	T05A12.4	up	Autosome
WBGene00020251	T05C1.4	up	Autosome
WBGene00020256	T05C3.6	up	Autosome
WBGene00020269	T05H4.6a	down	Autosome
WBGene00020317	pdf-1	down	Autosome
WBGene00020322	T07F12.2	up	X
WBGene00020334	atg-11	up	X
WBGene00020366	acdh-10	up	X
WBGene00020379	T09B4.5	up	Autosome
WBGene00020382	T09B4.8	up	Autosome
WBGene00020486	T13C5.6	up	X
WBGene00020490	T13G4.3	up	X
WBGene00020496	spat-3	up	X
WBGene00020507	vha-15	up	X
WBGene00020508	T14F9.2	up	X
WBGene00020511	immt-1	up	X
WBGene00020596	oga-1	up	X
WBGene00020630	T20F7.1	up	X
WBGene00020633	aakg-2	up	X
WBGene00020693	T22E7.1	up	Autosome
WBGene00020727	T23C6.5	up	X
WBGene00020757	ucr-2.3	down	Autosome
WBGene00020808	T25F10.6	down	Autosome
WBGene00020812	acdh-7	up	X
WBGene00020825	T26A8.2	up	Autosome
WBGene00020830	T26C11.4	up	X
WBGene00020838	T27A3.1	up	Autosome
WBGene00020883	fbxa-64	up	Autosome
WBGene00020902	jmjc-1	up	Autosome
WBGene00020998	W03F8.10	up	Autosome
WBGene00021014	W03G9.2	down	Autosome
WBGene00021043	W05G11.6	down	Autosome
WBGene00021044	W05H7.1	up	X
WBGene00021046	sedl-1	up	X
WBGene00021047	zfp-3	up	X
WBGene00021049	W05H9.2	up	X
WBGene00021051	W05H9.4	up	X
WBGene00021055	W06A11.4	up	Autosome
WBGene00021059	W06B11.1	up	X
WBGene00021073	nol-1	down	Autosome
WBGene00021186	Y9D1A.1	up	Autosome
WBGene00021206	Y17G9B.9	up	Autosome
WBGene00021247	Y22D7AL.9	down	Autosome
WBGene00021264	fbxa-13	up	Autosome
WBGene00021286	Y24D9A.8	up	Autosome
WBGene00021296	Y25C1A.13	up	Autosome
WBGene00021319	Y34B4A.2	up	X
WBGene00021323	Y34B4A.7	up	X
WBGene00021324	Y34B4A.8	up	X
WBGene00021340	Y34F4.5	down	Autosome
WBGene00021372	ugt-45	up	Autosome
WBGene00021396	cutl-24	down	Autosome
WBGene00021428	Y38F2AR.10	down	Autosome
WBGene00021444	Y39A3CR.3	down	Autosome
WBGene00021471	Y39G10AR.15	up	Autosome
WBGene00021485	Y40A1A.3	up	X
WBGene00021605	Y46H3C.5	up	Autosome
WBGene00021613	Y47A7.1	down	Autosome
WBGene00021654	Y47G7B.2	up	Autosome
WBGene00021697	gcn-1	down	Autosome
WBGene00021698	frl-1	down	Autosome
WBGene00021704	Y48G9A.11	down	Autosome
WBGene00021721	Y49F6B.9	down	Autosome
WBGene00021747	Y50D4C.2	down	Autosome
WBGene00021784	cogc-4	down	Autosome
WBGene00021812	Y53G8AR.5	down	Autosome
WBGene00021849	Y54F10AM.5	up	Autosome
WBGene00021853	Y54F10AM.11	up	Autosome
WBGene00021863	Y54F10BM.9	up	Autosome
WBGene00021866	Y54F10BM.12	down	Autosome
WBGene00021871	dml-1	up	Autosome
WBGene00021882	Y54G2A.17	down	Autosome
WBGene00021903	Y55B1AL.1	up	Autosome
WBGene00021912	Y55B1BR.2	up	Autosome
WBGene00021934	cct-8	down	Autosome
WBGene00021960	Y57E12AM.1	up	Autosome
WBGene00022010	catp-7	up	Autosome
WBGene00022031	Y65B4A.8	down	Autosome
WBGene00022048	fln-1	down	Autosome
WBGene00022089	Y69A2AR.18	down	Autosome
WBGene00022148	Y71G12B.8	down	Autosome
WBGene00022199	Y71H10A.1	up	X
WBGene00022201	Y71H10B.1	up	X
WBGene00022219	Y73B3A.18	up	X
WBGene00022252	Y73B6BL.31	up	Autosome
WBGene00022259	Y73C8B.2	up	Autosome
WBGene00022335	Y82E9BR.2	down	Autosome
WBGene00022361	Y92H12A.5	down	Autosome
WBGene00022393	Y97E10AL.2	down	Autosome
WBGene00022448	Y110A2AL.13	down	Autosome
WBGene00022475	Y119C1B.10	up	Autosome
WBGene00022488	Y119D3B.11	down	Autosome
WBGene00022501	ZC8.6	up	X
WBGene00022502	ZC13.1	up	X
WBGene00022576	ZC250.2	up	Autosome
WBGene00022590	ZC317.7	down	Autosome
WBGene00022613	ZC449.3	up	X
WBGene00022666	ZK154.4	up	X
WBGene00022668	ZK154.6	up	X
WBGene00022672	ZK177.4	down	Autosome
WBGene00022674	ZK177.9	up	Autosome
WBGene00022705	ZK354.2	up	Autosome
WBGene00022706	ZK354.3	up	Autosome
WBGene00022745	ZK470.2	up	X
WBGene00022769	ZK563.5	up	X
WBGene00022802	ZK688.7	up	Autosome
WBGene00023497	lin-15B	up	X
WBGene00023498	lin-15A	up	X
WBGene00043537	W03G1.3	up	Autosome
WBGene00044061	tbc-12	up	X
WBGene00044071	tag-233	up	X
WBGene00044134	D1025.10	up	X
WBGene00044142	H13N06.7	up	X
WBGene00044443	ZC21.10	up	Autosome
WBGene00044638	F23A7.8	down	X
WBGene00044989	Y37A1B.17	up	Autosome
WBGene00045392	F26D11.12	up	Autosome
WBGene00045401	T26F2.3	up	Autosome
WBGene00045435	Y34B4A.11	up	X
WBGene00045495	F11C1.7	up	X
WBGene00050944	C14A11.9	up	X
WBGene00077500	C27H6.9	down	Autosome
WBGene00194651	C33D9.13	up	Autosome
WBGene00194679	T26C11.9	up	X

## Sheet: mrg-1 vs wt PGCs
Wormbase_ID	Public_ID	change_mutant_vs_wt	X_vs_Autosome
WBGene00000037	ace-3	up	Autosome
WBGene00000040	aco-1	up	X
WBGene00000048	acr-9	up	X
WBGene00000057	acr-18	up	Autosome
WBGene00000064	act-2	down	Autosome
WBGene00000066	act-4	up	X
WBGene00000074	adm-2	up	X
WBGene00000075	adm-4	up	X
WBGene00000088	aex-5	up	Autosome
WBGene00000090	age-1	down	Autosome
WBGene00000094	agt-2	down	Autosome
WBGene00000100	ajm-1	up	X
WBGene00000102	akt-1	down	Autosome
WBGene00000103	akt-2	up	X
WBGene00000105	alg-1	up	X
WBGene00000107	alh-1	down	Autosome
WBGene00000120	aly-1	up	Autosome
WBGene00000140	anc-1	up	Autosome
WBGene00000144	apc-10	down	Autosome
WBGene00000157	aps-2	up	X
WBGene00000158	apg-1	down	Autosome
WBGene00000161	apa-2	up	X
WBGene00000164	apm-3	up	X
WBGene00000170	aqp-2	up	Autosome
WBGene00000172	aqp-4	up	Autosome
WBGene00000175	aqp-7	up	X
WBGene00000178	aqp-10	up	Autosome
WBGene00000180	arc-1	up	Autosome
WBGene00000195	arr-1	up	X
WBGene00000206	asb-1	down	Autosome
WBGene00000207	asb-2	up	X
WBGene00000209	asg-1	down	Autosome
WBGene00000210	asg-2	up	X
WBGene00000213	asm-3	up	Autosome
WBGene00000214	asp-1	up	Autosome
WBGene00000215	asp-2	up	Autosome
WBGene00000216	asp-3	up	X
WBGene00000218	asp-5	up	Autosome
WBGene00000219	asp-6	up	Autosome
WBGene00000221	atf-5	up	X
WBGene00000224	atgp-1	up	Autosome
WBGene00000225	atgp-2	up	Autosome
WBGene00000229	atp-2	down	Autosome
WBGene00000230	atp-3	down	Autosome
WBGene00000245	bca-1	up	X
WBGene00000248	ben-1	down	Autosome
WBGene00000253	bli-3	up	Autosome
WBGene00000259	bpl-1	down	Autosome
WBGene00000262	bra-1	up	X
WBGene00000269	bre-4	down	Autosome
WBGene00000294	cas-1	up	X
WBGene00000371	cco-1	down	Autosome
WBGene00000383	cdc-14	down	Autosome
WBGene00000386	cdc-25.1	down	Autosome
WBGene00000393	cdf-1	up	X
WBGene00000396	cdh-4	up	Autosome
WBGene00000402	cdh-10	up	Autosome
WBGene00000403	casy-1	up	Autosome
WBGene00000405	cdk-1	down	Autosome
WBGene00000406	cdk-4	up	X
WBGene00000444	ceh-21	up	X
WBGene00000460	ceh-39	up	X
WBGene00000473	cey-2	down	Autosome
WBGene00000474	cey-3	down	Autosome
WBGene00000475	cey-4	down	Autosome
WBGene00000479	cgh-1	down	Autosome
WBGene00000482	chd-3	up	X
WBGene00000501	cho-1	up	Autosome
WBGene00000502	chp-1	down	Autosome
WBGene00000513	ckb-3	up	Autosome
WBGene00000520	cku-80	down	Autosome
WBGene00000530	clh-3	up	Autosome
WBGene00000532	clh-5	down	Autosome
WBGene00000537	clk-2	down	Autosome
WBGene00000545	clp-4	up	Autosome
WBGene00000547	clp-7	down	Autosome
WBGene00000562	cng-1	up	Autosome
WBGene00000591	coh-1	up	X
WBGene00000594	col-3	up	Autosome
WBGene00000622	col-45	down	Autosome
WBGene00000626	col-49	up	Autosome
WBGene00000627	col-50	up	Autosome
WBGene00000673	col-98	up	Autosome
WBGene00000681	col-107	up	Autosome
WBGene00000685	col-111	down	Autosome
WBGene00000691	col-117	up	Autosome
WBGene00000706	col-132	down	Autosome
WBGene00000739	col-166	up	X
WBGene00000740	col-167	up	X
WBGene00000741	col-168	up	X
WBGene00000770	cpb-1	down	Autosome
WBGene00000772	cpb-3	down	Autosome
WBGene00000777	cpn-1	down	Autosome
WBGene00000781	cpr-1	up	Autosome
WBGene00000785	cpr-5	up	Autosome
WBGene00000792	crb-1	up	X
WBGene00000794	crn-1	down	Autosome
WBGene00000797	crn-4	up	X
WBGene00000803	csb-1	up	X
WBGene00000841	cul-6	up	Autosome
WBGene00000865	cyb-1	down	Autosome
WBGene00000875	cyk-4	down	Autosome
WBGene00000877	cyn-1	down	Autosome
WBGene00000884	cyn-8	up	X
WBGene00000903	daf-7	up	Autosome
WBGene00000915	daf-21	down	Autosome
WBGene00000929	dao-3	up	X
WBGene00000940	dcs-1	down	Autosome
WBGene00000959	dgk-2	up	X
WBGene00000975	dhs-12	down	Autosome
WBGene00000982	dhs-19	up	Autosome
WBGene00001008	dlk-1	up	Autosome
WBGene00001025	dnj-7	up	X
WBGene00001032	dnj-14	up	X
WBGene00001045	dnj-27	up	Autosome
WBGene00001046	dnj-28	down	Autosome
WBGene00001081	dpy-22	up	X
WBGene00001082	dpy-23	up	X
WBGene00001086	dpy-27	up	Autosome
WBGene00001088	dpy-30	down	Autosome
WBGene00001093	drp-1	down	Autosome
WBGene00001102	dsh-2	down	Autosome
WBGene00001105	dsl-3	down	Autosome
WBGene00001115	dyb-1	down	Autosome
WBGene00001119	dyf-3	down	Autosome
WBGene00001122	dyf-6	up	X
WBGene00001129	dyf-13	up	Autosome
WBGene00001130	dyn-1	up	X
WBGene00001150	ech-1	up	Autosome
WBGene00001153	ech-4	down	Autosome
WBGene00001168	eef-1A.1	down	Autosome
WBGene00001169	eef-1A.2	up	X
WBGene00001171	egl-2	up	Autosome
WBGene00001177	egl-8	up	Autosome
WBGene00001224	ehs-1	down	Autosome
WBGene00001226	eif-3.C	down	Autosome
WBGene00001229	eif-3.F	down	Autosome
WBGene00001232	eif-3.I	down	Autosome
WBGene00001233	eif-3.K	down	Autosome
WBGene00001234	eif-6	down	Autosome
WBGene00001240	elo-2	up	Autosome
WBGene00001243	elo-5	up	Autosome
WBGene00001244	elo-6	up	Autosome
WBGene00001248	elp-1	up	Autosome
WBGene00001281	emb-27	down	Autosome
WBGene00001320	ent-1	down	Autosome
WBGene00001325	eor-2	up	X
WBGene00001330	eps-8	up	Autosome
WBGene00001331	erd-2	up	X
WBGene00001333	erm-1	down	Autosome
WBGene00001338	ears-2	down	Autosome
WBGene00001345	fos-1	up	Autosome
WBGene00001394	fat-2	up	Autosome
WBGene00001395	fat-3	up	Autosome
WBGene00001398	fat-6	up	Autosome
WBGene00001401	fbf-1	down	Autosome
WBGene00001423	fib-1	down	Autosome
WBGene00001427	fkb-2	down	Autosome
WBGene00001439	fkh-7	up	Autosome
WBGene00001479	fmo-4	up	Autosome
WBGene00001481	fog-1	down	Autosome
WBGene00001482	fog-2	down	Autosome
WBGene00001483	fog-3	down	Autosome
WBGene00001489	frm-2	up	Autosome
WBGene00001497	fars-1	down	Autosome
WBGene00001503	fum-1	down	Autosome
WBGene00001516	gap-2	up	X
WBGene00001520	gas-1	up	X
WBGene00001562	lin-66	up	Autosome
WBGene00001564	gei-7	up	Autosome
WBGene00001565	gei-8	up	Autosome
WBGene00001566	acdh-13	down	Autosome
WBGene00001569	gei-12	up	X
WBGene00001579	gex-2	up	Autosome
WBGene00001583	gfi-3	up	X
WBGene00001604	gln-3	up	Autosome
WBGene00001617	glr-6	up	X
WBGene00001649	gob-1	up	X
WBGene00001651	gon-2	up	Autosome
WBGene00001653	gon-4	down	Autosome
WBGene00001661	gop-2	down	Autosome
WBGene00001683	gpd-1	down	Autosome
WBGene00001691	grd-2	up	Autosome
WBGene00001744	gars-1	down	Autosome
WBGene00001755	gst-7	up	Autosome
WBGene00001786	gst-38	up	Autosome
WBGene00001814	haf-4	up	Autosome
WBGene00001816	haf-6	down	Autosome
WBGene00001819	haf-9	up	Autosome
WBGene00001831	hcp-3	down	Autosome
WBGene00001844	hid-1	up	X
WBGene00001851	hif-1	up	Autosome
WBGene00001854	hil-3	up	X
WBGene00001855	hil-4	down	Autosome
WBGene00001856	hil-5	down	Autosome
WBGene00001872	him-14	down	Autosome
WBGene00001898	his-24	up	X
WBGene00001906	his-32	down	Autosome
WBGene00001919	his-45	down	Autosome
WBGene00001938	his-64	down	Autosome
WBGene00001942	his-68	down	Autosome
WBGene00001945	his-71	up	X
WBGene00001971	hmg-1.1	down	Autosome
WBGene00001994	hpk-1	up	X
WBGene00001997	hpr-9	down	Autosome
WBGene00001998	hpr-17	down	Autosome
WBGene00002005	hsp-1	down	Autosome
WBGene00002007	hsp-3	up	X
WBGene00002015	hsp-16.1	up	Autosome
WBGene00002016	hsp-16.2	up	Autosome
WBGene00002017	hsp-16.11	up	Autosome
WBGene00002018	hsp-16.41	up	Autosome
WBGene00002019	hsp-16.48	up	Autosome
WBGene00002020	hsp-16.49	up	Autosome
WBGene00002023	hsp-25	up	X
WBGene00002028	hst-1	down	Autosome
WBGene00002029	hst-2	up	X
WBGene00002044	hyl-2	up	X
WBGene00002045	icd-1	down	Autosome
WBGene00002054	ifb-2	up	Autosome
WBGene00002056	ifc-2	up	X
WBGene00002057	ifd-1	up	X
WBGene00002060	ife-2	up	X
WBGene00002063	ife-5	up	Autosome
WBGene00002064	iff-1	down	Autosome
WBGene00002065	iff-2	up	Autosome
WBGene00002067	ifp-1	up	X
WBGene00002073	ima-2	down	Autosome
WBGene00002075	imb-1	down	Autosome
WBGene00002076	imb-2	down	Autosome
WBGene00002134	inx-12	up	Autosome
WBGene00002175	jac-1	up	Autosome
WBGene00002183	kat-1	down	Autosome
WBGene00002185	kel-3	down	Autosome
WBGene00002187	kgb-1	up	Autosome
WBGene00002189	kin-1	up	Autosome
WBGene00002196	kin-10	down	Autosome
WBGene00002207	kin-25	up	X
WBGene00002214	klc-1	down	Autosome
WBGene00002215	klc-2	up	Autosome
WBGene00002220	klp-8	up	X
WBGene00002226	klp-16	down	Autosome
WBGene00002232	kpc-1	up	Autosome
WBGene00002262	ldh-1	up	Autosome
WBGene00002266	lec-3	up	Autosome
WBGene00002274	lec-11	up	Autosome
WBGene00002295	let-19	up	Autosome
WBGene00002363	let-92	down	Autosome
WBGene00002979	lfe-2	up	Autosome
WBGene00002985	lig-1	down	Autosome
WBGene00002991	lin-2	up	X
WBGene00002997	lin-8	down	Autosome
WBGene00002999	lin-10	up	Autosome
WBGene00003011	lin-25	up	Autosome
WBGene00003036	lin-53	down	Autosome
WBGene00003040	lin-59	up	Autosome
WBGene00003041	lin-61	down	Autosome
WBGene00003043	lip-1	down	Autosome
WBGene00003053	lmp-1	up	X
WBGene00003072	lrp-2	up	Autosome
WBGene00003079	lsm-5	down	Autosome
WBGene00003084	lst-2	up	X
WBGene00003093	lys-4	up	Autosome
WBGene00003097	lys-8	up	Autosome
WBGene00003102	mab-5	up	Autosome
WBGene00003111	mab-20	up	Autosome
WBGene00003130	map-2	down	Autosome
WBGene00003149	mbk-1	up	X
WBGene00003156	mcm-4	down	Autosome
WBGene00003161	mdf-2	down	Autosome
WBGene00003162	mdh-2	down	Autosome
WBGene00003168	mec-4	up	X
WBGene00003185	mek-1	up	X
WBGene00003214	mel-32	down	Autosome
WBGene00003218	mep-1	down	Autosome
WBGene00003219	mes-1	up	X
WBGene00003220	mes-2	down	Autosome
WBGene00003242	mig-6	up	Autosome
WBGene00003246	mig-14	down	Autosome
WBGene00003247	mig-15	up	X
WBGene00003254	mig-23	up	X
WBGene00003258	cogc-1	up	Autosome
WBGene00003374	mlk-1	up	Autosome
WBGene00003394	mom-1	up	X
WBGene00003406	mrg-1	down	Autosome
WBGene00003407	mrp-1	up	X
WBGene00003409	mrp-3	up	X
WBGene00003410	mrp-4	up	X
WBGene00003411	mrp-5	up	X
WBGene00003412	mrp-6	up	X
WBGene00003414	mrp-8	up	Autosome
WBGene00003477	mtm-5	up	X
WBGene00003507	mut-14	down	Autosome
WBGene00003588	nex-1	down	Autosome
WBGene00003600	nhr-1	up	X
WBGene00003609	nhr-10	up	Autosome
WBGene00003612	nhr-13	up	Autosome
WBGene00003614	nhr-15	up	Autosome
WBGene00003619	nhr-20	up	Autosome
WBGene00003636	nhr-46	up	Autosome
WBGene00003637	nhr-47	up	Autosome
WBGene00003657	nhr-67	up	Autosome
WBGene00003661	nhr-71	up	X
WBGene00003695	nhr-105	up	Autosome
WBGene00003733	nhx-5	up	X
WBGene00003772	nlr-1	up	Autosome
WBGene00003776	nmy-1	up	X
WBGene00003799	npp-13	down	Autosome
WBGene00003822	nsy-1	up	Autosome
WBGene00003829	nud-1	down	Autosome
WBGene00003835	nxf-2	down	Autosome
WBGene00003883	osm-1	up	X
WBGene00003903	pab-2	up	X
WBGene00003911	pak-1	up	X
WBGene00003914	pam-1	down	Autosome
WBGene00003920	par-5	down	Autosome
WBGene00003923	pas-2	down	Autosome
WBGene00003924	pas-3	down	Autosome
WBGene00003936	pat-12	up	Autosome
WBGene00003949	pbs-3	down	Autosome
WBGene00003950	pbs-4	down	Autosome
WBGene00003951	pbs-5	down	Autosome
WBGene00003958	pcp-3	up	Autosome
WBGene00003963	pdi-2	up	X
WBGene00003967	pdr-1	down	Autosome
WBGene00003970	pek-1	up	X
WBGene00003993	pgl-2	down	Autosome
WBGene00004028	pif-1	down	Autosome
WBGene00004037	plc-2	up	Autosome
WBGene00004038	plc-3	up	Autosome
WBGene00004050	pme-2	down	Autosome
WBGene00004053	pme-5	up	Autosome
WBGene00004056	pmk-2	up	Autosome
WBGene00004088	ppk-2	down	Autosome
WBGene00004089	ppk-3	up	X
WBGene00004093	ppw-1	down	Autosome
WBGene00004094	ppw-2	down	Autosome
WBGene00004130	ketn-1	up	Autosome
WBGene00004131	pqn-44	up	Autosome
WBGene00004148	pqn-65	up	X
WBGene00004155	pqn-73	up	Autosome
WBGene00004179	prg-2	down	Autosome
WBGene00004188	prp-21	down	Autosome
WBGene00004215	ptp-3	up	Autosome
WBGene00004225	ptr-11	up	Autosome
WBGene00004237	ptr-23	up	Autosome
WBGene00004245	puf-9	up	X
WBGene00004256	pxn-1	up	Autosome
WBGene00004258	pyc-1	down	Autosome
WBGene00004259	pyr-1	up	Autosome
WBGene00004269	rab-6.1	down	Autosome
WBGene00004270	rab-6.2	up	X
WBGene00004300	ram-2	up	Autosome
WBGene00004302	ran-1	down	Autosome
WBGene00004307	rap-1	down	Autosome
WBGene00004313	rbc-1	up	X
WBGene00004338	rfc-2	down	Autosome
WBGene00004348	rgs-5	down	Autosome
WBGene00004352	rgs-9	up	X
WBGene00004354	rgs-11	up	X
WBGene00004356	rhi-1	up	X
WBGene00004358	rhr-1	up	Autosome
WBGene00004368	ric-19	up	Autosome
WBGene00004369	rig-1	up	X
WBGene00004375	rme-4	up	X
WBGene00004380	rnf-1	down	Autosome
WBGene00004385	rnp-2	down	Autosome
WBGene00004402	rom-3	up	Autosome
WBGene00004408	rla-0	down	Autosome
WBGene00004409	rla-1	down	Autosome
WBGene00004410	rla-2	down	Autosome
WBGene00004413	rpl-2	down	Autosome
WBGene00004415	rpl-4	down	Autosome
WBGene00004416	rpl-5	down	Autosome
WBGene00004417	rpl-6	down	Autosome
WBGene00004418	rpl-7	down	Autosome
WBGene00004419	rpl-7A	down	Autosome
WBGene00004420	rpl-9	down	Autosome
WBGene00004421	rpl-10	down	Autosome
WBGene00004422	rpl-11.1	down	Autosome
WBGene00004423	rpl-11.2	up	X
WBGene00004425	rpl-13	down	Autosome
WBGene00004426	rpl-14	down	Autosome
WBGene00004429	rpl-17	down	Autosome
WBGene00004430	rpl-18	down	Autosome
WBGene00004431	rpl-19	down	Autosome
WBGene00004432	rpl-20	down	Autosome
WBGene00004433	rpl-21	down	Autosome
WBGene00004434	rpl-22	down	Autosome
WBGene00004435	rpl-23	down	Autosome
WBGene00004436	rpl-24.1	down	Autosome
WBGene00004437	rpl-24.2	down	Autosome
WBGene00004438	rpl-25.1	up	X
WBGene00004439	rpl-25.2	down	Autosome
WBGene00004440	rpl-26	down	Autosome
WBGene00004441	rpl-27	down	Autosome
WBGene00004442	rpl-28	down	Autosome
WBGene00004443	rpl-29	down	Autosome
WBGene00004444	rpl-30	down	Autosome
WBGene00004445	rpl-31	down	Autosome
WBGene00004446	rpl-32	down	Autosome
WBGene00004447	rpl-33	down	Autosome
WBGene00004448	rpl-34	down	Autosome
WBGene00004449	rpl-35	down	Autosome
WBGene00004450	rpl-36	down	Autosome
WBGene00004451	rpl-37	down	Autosome
WBGene00004452	rpl-38	down	Autosome
WBGene00004453	rpl-39	down	Autosome
WBGene00004454	rpl-41	down	Autosome
WBGene00004456	rpl-43	down	Autosome
WBGene00004463	rpn-7	down	Autosome
WBGene00004469	rps-0	down	Autosome
WBGene00004470	rps-1	down	Autosome
WBGene00004471	rps-2	down	Autosome
WBGene00004472	rps-3	down	Autosome
WBGene00004473	rps-4	down	Autosome
WBGene00004474	rps-5	down	Autosome
WBGene00004475	rps-6	down	Autosome
WBGene00004476	rps-7	down	Autosome
WBGene00004477	rps-8	down	Autosome
WBGene00004478	rps-9	down	Autosome
WBGene00004479	rps-10	down	Autosome
WBGene00004480	rps-11	down	Autosome
WBGene00004481	rps-12	down	Autosome
WBGene00004482	rps-13	down	Autosome
WBGene00004483	rps-14	down	Autosome
WBGene00004484	rps-15	down	Autosome
WBGene00004485	rps-16	down	Autosome
WBGene00004486	rps-17	down	Autosome
WBGene00004487	rps-18	down	Autosome
WBGene00004488	rps-19	down	Autosome
WBGene00004489	rps-20	down	Autosome
WBGene00004490	rps-21	down	Autosome
WBGene00004491	rps-22	down	Autosome
WBGene00004492	rps-23	down	Autosome
WBGene00004493	rps-24	down	Autosome
WBGene00004494	rps-25	down	Autosome
WBGene00004495	rps-26	down	Autosome
WBGene00004496	rps-27	down	Autosome
WBGene00004497	rps-28	down	Autosome
WBGene00004498	rps-29	down	Autosome
WBGene00004499	rps-30	down	Autosome
WBGene00004503	rpt-3	down	Autosome
WBGene00004509	rrf-2	up	Autosome
WBGene00004682	rsd-3	up	X
WBGene00004703	rsp-6	down	Autosome
WBGene00004705	rsp-8	down	Autosome
WBGene00004727	sax-1	up	X
WBGene00004729	sax-3	up	X
WBGene00004745	sdc-1	up	X
WBGene00004749	sdn-1	up	X
WBGene00004769	sel-12	up	X
WBGene00004774	sem-5	up	X
WBGene00004795	sid-1	down	Autosome
WBGene00004807	skr-1	down	Autosome
WBGene00004808	skr-2	down	Autosome
WBGene00004809	skr-3	up	Autosome
WBGene00004855	sma-1	up	Autosome
WBGene00004862	sma-9	up	X
WBGene00004884	smg-6	down	Autosome
WBGene00004887	smn-1	down	Autosome
WBGene00004891	smr-1	down	Autosome
WBGene00004893	sms-2	up	X
WBGene00004900	snf-1	up	Autosome
WBGene00004906	snf-7	up	Autosome
WBGene00004918	snr-5	down	Autosome
WBGene00004920	snr-7	down	Autosome
WBGene00004929	soc-2	up	Autosome
WBGene00004952	spd-1	down	Autosome
WBGene00004954	spd-3	down	Autosome
WBGene00004955	spd-5	down	Autosome
WBGene00004993	spp-8	up	Autosome
WBGene00005008	spr-3	up	X
WBGene00005011	F26F4.8	down	Autosome
WBGene00005048	sra-22	up	Autosome
WBGene00005573	sri-61	up	Autosome
WBGene00005574	sri-62	up	Autosome
WBGene00005648	srp-7	down	Autosome
WBGene00005663	sars-1	down	Autosome
WBGene00005931	fbxa-199	up	Autosome
WBGene00006066	sto-4	up	X
WBGene00006067	sto-5	up	X
WBGene00006351	sur-5	up	X
WBGene00006369	sym-4	up	X
WBGene00006371	syx-3	up	X
WBGene00006375	syp-1	down	Autosome
WBGene00006384	taf-3	up	X
WBGene00006394	taf-11.2	up	Autosome
WBGene00006397	taf-13	down	Autosome
WBGene00006402	fut-3	down	Autosome
WBGene00006410	nck-1	up	X
WBGene00006432	tag-53	up	X
WBGene00006439	ant-1.1	down	Autosome
WBGene00006472	tag-123	up	X
WBGene00006477	tag-130	up	X
WBGene00006479	tmbi-4	up	X
WBGene00006493	tag-147	up	X
WBGene00006494	hke-4.2	up	X
WBGene00006496	cgef-1	up	X
WBGene00006499	tag-153	down	Autosome
WBGene00006517	tag-172	up	X
WBGene00006523	tam-1	down	Autosome
WBGene00006529	tba-2	down	Autosome
WBGene00006537	tbb-2	down	Autosome
WBGene00006539	tbb-6	up	Autosome
WBGene00006575	tir-1	up	Autosome
WBGene00006590	toc-1	down	Autosome
WBGene00006602	tps-1	up	X
WBGene00006603	tps-2	up	Autosome
WBGene00006616	trp-4	up	Autosome
WBGene00006617	tars-1	down	Autosome
WBGene00006619	try-1	down	Autosome
WBGene00006649	tth-1	up	X
WBGene00006703	ubc-6	down	Autosome
WBGene00006713	ubc-18	down	Autosome
WBGene00006718	ubc-23	up	X
WBGene00006722	ubh-2	down	Autosome
WBGene00006723	ubh-3	down	Autosome
WBGene00006725	ubl-1	down	Autosome
WBGene00006728	ubq-2	down	Autosome
WBGene00006734	ufd-2	down	Autosome
WBGene00006740	ulp-5	down	Autosome
WBGene00006742	unc-2	up	X
WBGene00006752	unc-13	up	Autosome
WBGene00006757	unc-18	up	X
WBGene00006780	unc-44	up	Autosome
WBGene00006781	unc-45	down	Autosome
WBGene00006786	unc-51	up	Autosome
WBGene00006788	unc-53	up	Autosome
WBGene00006792	unc-58	up	X
WBGene00006803	unc-70	up	Autosome
WBGene00006812	unc-80	up	Autosome
WBGene00006815	unc-83	up	Autosome
WBGene00006816	unc-84	up	X
WBGene00006825	unc-96	up	X
WBGene00006836	unc-112	up	Autosome
WBGene00006839	unc-115	up	X
WBGene00006856	usp-14	down	Autosome
WBGene00006876	vab-10	up	Autosome
WBGene00006889	pfd-3	down	Autosome
WBGene00006890	vem-1	up	X
WBGene00006915	vha-6	up	Autosome
WBGene00006921	vha-12	up	X
WBGene00006923	vhp-1	up	Autosome
WBGene00006924	vig-1	down	Autosome
WBGene00006968	yars-1	down	Autosome
WBGene00006981	zig-4	up	X
WBGene00007001	tufm-2	down	Autosome
WBGene00007011	mdt-1.2	up	X
WBGene00007025	mdt-29	down	Autosome
WBGene00007036	sod-5	up	Autosome
WBGene00007053	tag-192	up	Autosome
WBGene00007065	pot-3	down	Autosome
WBGene00007090	B0001.5	down	Autosome
WBGene00007091	B0001.6	up	Autosome
WBGene00007094	B0019.2	down	Autosome
WBGene00007101	B0024.11	down	Autosome
WBGene00007106	B0035.3	down	Autosome
WBGene00007109	B0035.6	down	Autosome
WBGene00007131	B0284.1	up	Autosome
WBGene00007132	B0284.2	up	Autosome
WBGene00007150	B0365.1	down	Autosome
WBGene00007153	clec-41	up	Autosome
WBGene00007163	fbxa-154	up	Autosome
WBGene00007168	B0393.3	down	Autosome
WBGene00007171	B0393.6	down	Autosome
WBGene00007181	B0462.1	up	Autosome
WBGene00007185	nlp-36	down	Autosome
WBGene00007192	B0491.5	down	Autosome
WBGene00007198	B0513.6	up	Autosome
WBGene00007278	lab-1	down	Autosome
WBGene00007284	C03H12.1	up	X
WBGene00007287	gck-4	up	X
WBGene00007296	arrd-25	up	X
WBGene00007297	C04F12.1	up	Autosome
WBGene00007332	C05C10.5	down	Autosome
WBGene00007334	C05C10.7	down	Autosome
WBGene00007348	C05G5.2	up	X
WBGene00007350	C05G5.4	up	X
WBGene00007354	C06A1.3	down	Autosome
WBGene00007363	stdh-1	up	Autosome
WBGene00007388	folt-1	up	Autosome
WBGene00007395	C06H5.7	up	Autosome
WBGene00007445	C08F8.3	down	Autosome
WBGene00007464	C08H9.3	down	Autosome
WBGene00007479	C09F9.2	up	Autosome
WBGene00007487	C09G1.5	up	X
WBGene00007513	wht-2	down	Autosome
WBGene00007516	C11E4.1	down	X
WBGene00007524	C11G6.3	up	X
WBGene00007603	C15C6.4	down	Autosome
WBGene00007605	C15C8.3	up	Autosome
WBGene00007628	C16C10.8	down	Autosome
WBGene00007656	C17H1.3	up	Autosome
WBGene00007657	C17H1.4	up	Autosome
WBGene00007667	fbxa-97	up	X
WBGene00007668	C18B12.6	up	X
WBGene00007672	fbxa-136	up	Autosome
WBGene00007675	C18D4.6	up	Autosome
WBGene00007677	C18D4.8	up	Autosome
WBGene00007694	C23H4.6	up	X
WBGene00007709	clec-87	down	Autosome
WBGene00007710	rsa-1	down	Autosome
WBGene00007750	syg-2	up	X
WBGene00007762	C27B7.5	down	Autosome
WBGene00007774	C27C12.4	up	X
WBGene00007780	C27D8.4	down	Autosome
WBGene00007797	C29A12.1	down	Autosome
WBGene00007846	C31E10.5	up	X
WBGene00007847	C31E10.6	up	X
WBGene00007849	tbc-19	up	X
WBGene00007860	C32A3.3	down	Autosome
WBGene00007921	C34C12.2	down	Autosome
WBGene00007941	C34F6.7	up	X
WBGene00007942	idh-2	up	X
WBGene00007943	C34F6.9	up	X
WBGene00007953	hdac-11	up	Autosome
WBGene00007955	C35C5.3	up	X
WBGene00007956	C35C5.6	up	X
WBGene00007965	C36A4.4	down	Autosome
WBGene00007978	C36B1.11	down	Autosome
WBGene00007980	C36E8.1	down	Autosome
WBGene00007993	C37E2.1	up	X
WBGene00008003	C38D4.1	down	Autosome
WBGene00008009	fbxa-171	up	Autosome
WBGene00008010	C38D9.2	up	Autosome
WBGene00008015	fbxa-174	up	Autosome
WBGene00008018	tbc-8	up	Autosome
WBGene00008023	C39B10.3	up	X
WBGene00008082	com-1	down	Autosome
WBGene00008086	C44C10.5	up	X
WBGene00008099	C44H9.4	up	Autosome
WBGene00008101	C44H9.6	up	Autosome
WBGene00008110	C46C2.2	up	Autosome
WBGene00008117	gsr-1	down	Autosome
WBGene00008132	gale-1	down	Autosome
WBGene00008134	C47B2.9	down	Autosome
WBGene00008205	sams-1	up	X
WBGene00008210	C49F5.6	up	X
WBGene00008218	nasp-2	down	Autosome
WBGene00008229	C50F4.1	up	Autosome
WBGene00008262	ril-1	down	Autosome
WBGene00008265	C53A5.5	up	Autosome
WBGene00008267	C53A5.9	up	Autosome
WBGene00008301	dct-3	up	Autosome
WBGene00008302	C54D10.8	up	Autosome
WBGene00008303	C54D10.9	up	Autosome
WBGene00008316	dod-18	down	Autosome
WBGene00008330	C55A6.1	down	Autosome
WBGene00008344	C56A3.5	down	Autosome
WBGene00008353	D1025.1	up	X
WBGene00008355	fbxa-141	up	X
WBGene00008431	D2085.6	down	Autosome
WBGene00008446	E01G4.3	down	Autosome
WBGene00008455	E02H1.1	down	Autosome
WBGene00008503	F01G4.4	up	Autosome
WBGene00008506	tkt-1	down	Autosome
WBGene00008515	F02C12.1	up	X
WBGene00008530	F02E9.5	down	Autosome
WBGene00008532	F02E9.9	down	Autosome
WBGene00008533	F02E9.10	down	Autosome
WBGene00008549	din-1	up	Autosome
WBGene00008576	F08G2.4	up	Autosome
WBGene00008580	F08G5.1	down	Autosome
WBGene00008586	F08G12.2	up	X
WBGene00008607	F09B12.3	up	X
WBGene00008615	F09C6.1	up	Autosome
WBGene00008617	F09C6.3	up	Autosome
WBGene00008622	F09C8.2	up	X
WBGene00008641	pch-2	down	Autosome
WBGene00008690	F11C1.1	up	X
WBGene00008691	mff-1	up	X
WBGene00008694	F11C1.5	up	X
WBGene00008698	F11D11.3	up	Autosome
WBGene00008710	F11E6.7	down	Autosome
WBGene00008722	F12F6.7	down	Autosome
WBGene00008741	F13D12.6	up	Autosome
WBGene00008749	F13E6.5	up	X
WBGene00008805	git-1	up	X
WBGene00008806	mboa-7	up	X
WBGene00008838	F15A4.2	up	Autosome
WBGene00008862	F15D4.5	up	Autosome
WBGene00008863	F15D4.6	up	Autosome
WBGene00008882	F16B12.6	up	X
WBGene00008900	F16H6.10	up	Autosome
WBGene00008921	F17C11.10	down	Autosome
WBGene00008922	F17C11.11	up	Autosome
WBGene00008927	F17H10.3	up	X
WBGene00008930	F18A11.3	down	Autosome
WBGene00008934	F18C12.3	down	Autosome
WBGene00008939	F18H3.1	up	X
WBGene00008940	F18H3.4	up	X
WBGene00008944	F19B2.5	up	Autosome
WBGene00008945	F19B2.6	up	Autosome
WBGene00008958	F19H6.3	up	X
WBGene00008974	tbc-1	up	X
WBGene00008975	F20D1.3	up	X
WBGene00008983	F20E11.5	up	Autosome
WBGene00008984	F20E11.7	up	Autosome
WBGene00008993	F21A3.3	up	Autosome
WBGene00008995	F21A3.5	down	Autosome
WBGene00008996	glb-14	up	Autosome
WBGene00008999	F21A10.2	up	X
WBGene00009004	pfd-6	down	Autosome
WBGene00009010	F21D5.5	down	Autosome
WBGene00009013	F21D5.8	down	Autosome
WBGene00009027	F21G4.6	up	X
WBGene00009049	F22B8.7	up	Autosome
WBGene00009054	F22D6.9	down	Autosome
WBGene00009077	F23B2.10	up	Autosome
WBGene00009113	F25D7.4	down	Autosome
WBGene00009119	F25H2.5	down	Autosome
WBGene00009122	tct-1	down	Autosome
WBGene00009126	pyk-1	down	Autosome
WBGene00009127	F25H5.5	down	Autosome
WBGene00009128	F25H5.6	down	Autosome
WBGene00009138	F25H9.6	down	Autosome
WBGene00009139	F25H9.7	down	Autosome
WBGene00009145	F26A3.7	down	Autosome
WBGene00009161	F26E4.6	down	Autosome
WBGene00009164	hrdl-1	down	Autosome
WBGene00009166	F26F2.1	up	Autosome
WBGene00009182	F26H11.4	down	Autosome
WBGene00009196	F28B1.2	up	Autosome
WBGene00009231	F28H6.2	up	X
WBGene00009237	F28H7.3	up	Autosome
WBGene00009246	F29C12.4	down	Autosome
WBGene00009262	F30A10.3	down	Autosome
WBGene00009266	F30A10.9	down	Autosome
WBGene00009270	F30F8.1	down	Autosome
WBGene00009292	F31D4.5	up	Autosome
WBGene00009299	F31E9.6	up	Autosome
WBGene00009307	F32A11.1	down	Autosome
WBGene00009330	F32D8.5	down	Autosome
WBGene00009342	fasn-1	up	Autosome
WBGene00009361	F33E2.5	up	Autosome
WBGene00009368	F33H2.5	down	Autosome
WBGene00009394	clec-63	up	Autosome
WBGene00009396	clec-65	up	Autosome
WBGene00009416	F35E2.9	up	Autosome
WBGene00009499	F36H2.2	down	Autosome
WBGene00009508	F37D6.2	down	Autosome
WBGene00009511	F37H8.2	up	Autosome
WBGene00009552	piki-1	up	X
WBGene00009571	F40D4.12	up	Autosome
WBGene00009595	F40F12.7	up	Autosome
WBGene00009635	F42F12.3	up	X
WBGene00009648	F43C1.3	down	Autosome
WBGene00009653	F43D9.1	up	Autosome
WBGene00009664	F43G9.1	down	Autosome
WBGene00009674	nucb-1	up	X
WBGene00009678	F44D12.1	up	Autosome
WBGene00009688	F44E5.1	down	Autosome
WBGene00009691	F44E5.4	up	Autosome
WBGene00009692	F44E5.5	up	Autosome
WBGene00009695	F44F1.3	up	Autosome
WBGene00009702	F44F4.3	up	Autosome
WBGene00009710	F44G3.10	up	Autosome
WBGene00009713	F44G4.3	down	Autosome
WBGene00009739	F45H10.2	down	Autosome
WBGene00009740	F45H10.3	down	Autosome
WBGene00009754	F46A9.1	up	Autosome
WBGene00009772	ztf-7	down	Autosome
WBGene00009776	F46B6.12	down	Autosome
WBGene00009787	F46F2.3	up	X
WBGene00009793	pkn-1	up	X
WBGene00009800	rrc-1	up	X
WBGene00009801	F47A4.5	up	X
WBGene00009804	F47B8.3	up	Autosome
WBGene00009823	F47G4.2	up	Autosome
WBGene00009825	F47G4.4	up	Autosome
WBGene00009865	F49B2.6	down	Autosome
WBGene00009878	F49C12.9	down	Autosome
WBGene00009880	F49C12.11	down	Autosome
WBGene00009888	F49E2.5	up	X
WBGene00009905	clec-240	up	Autosome
WBGene00009908	F49H6.5	up	Autosome
WBGene00009918	F52A8.5	down	Autosome
WBGene00009962	F53B6.7	down	Autosome
WBGene00009993	F53F4.11	down	Autosome
WBGene00010011	F53H4.6	up	X
WBGene00010031	F54B11.8	up	X
WBGene00010036	cpar-1	down	Autosome
WBGene00010047	F54D1.6	up	Autosome
WBGene00010051	F54D5.5	up	Autosome
WBGene00010057	F54D5.15	up	Autosome
WBGene00010067	F54F7.7	up	X
WBGene00010083	F55B11.1	up	Autosome
WBGene00010089	F55B12.4	down	Autosome
WBGene00010123	F55G11.2	up	Autosome
WBGene00010128	F55G11.8	up	Autosome
WBGene00010138	F56A8.1	up	Autosome
WBGene00010199	bet-2	up	X
WBGene00010204	F57F5.1	up	Autosome
WBGene00010227	F58A4.2	down	Autosome
WBGene00010230	F58A4.9	down	Autosome
WBGene00010232	F58B3.6	down	Autosome
WBGene00010234	ttr-50	up	Autosome
WBGene00010266	dct-18	up	Autosome
WBGene00010309	rpn-6.2	down	Autosome
WBGene00010320	F59B10.4	up	Autosome
WBGene00010336	F59F4.1	up	X
WBGene00010338	F59F4.3	up	X
WBGene00010345	F59F5.7	up	X
WBGene00010362	H04D03.1	down	Autosome
WBGene00010433	H40L08.1	up	X
WBGene00010434	H40L08.3	up	X
WBGene00010453	fozi-1	down	Autosome
WBGene00010457	K01C8.2	up	Autosome
WBGene00010470	cdr-4	up	Autosome
WBGene00010477	K01G5.3	down	Autosome
WBGene00010478	K01G5.5	down	Autosome
WBGene00010481	K01G5.10	down	Autosome
WBGene00010492	meg-1	up	X
WBGene00010493	meg-2	up	X
WBGene00010552	K04C1.2	up	X
WBGene00010553	K04C1.3	up	X
WBGene00010556	rack-1	down	Autosome
WBGene00010557	mspn-1	down	Autosome
WBGene00010572	wdr-5.2	up	X
WBGene00010585	K05C4.9	up	Autosome
WBGene00010587	K05C4.11	up	Autosome
WBGene00010605	K06G5.1	up	X
WBGene00010609	dut-1	down	Autosome
WBGene00010639	K07F5.15	down	Autosome
WBGene00010661	tyr-2	up	Autosome
WBGene00010677	K08F4.2	down	Autosome
WBGene00010700	nipi-3	up	X
WBGene00010702	usp-33	up	X
WBGene00010721	K09E4.3	down	Autosome
WBGene00010724	K09E9.1	up	X
WBGene00010725	erv-46	up	X
WBGene00010769	asah-1	up	Autosome
WBGene00010788	sulp-4	up	Autosome
WBGene00010793	LLC1.2	up	Autosome
WBGene00010813	M01F1.7	up	Autosome
WBGene00010822	M01G12.9	up	Autosome
WBGene00010847	M04B2.4	down	Autosome
WBGene00010868	somi-1	up	Autosome
WBGene00010896	M28.5	down	Autosome
WBGene00010935	M163.1	up	X
WBGene00010942	chch-3	down	Autosome
WBGene00010975	R01H10.7	down	Autosome
WBGene00010981	R03A10.1	up	X
WBGene00010984	nkat-3	up	X
WBGene00010993	R03E1.2	up	X
WBGene00011015	R04F11.2	down	Autosome
WBGene00011038	R05H5.3	down	Autosome
WBGene00011059	R06C1.4	up	Autosome
WBGene00011087	R07B7.2	down	Autosome
WBGene00011102	R07E3.1	up	X
WBGene00011139	R08B4.3	up	X
WBGene00011152	R09A8.1	up	X
WBGene00011153	R09A8.2	up	X
WBGene00011155	R09B3.2	down	Autosome
WBGene00011156	R09B3.3	down	Autosome
WBGene00011182	R09H10.5	up	Autosome
WBGene00011198	R10E4.1	up	Autosome
WBGene00011207	R10E8.1	up	Autosome
WBGene00011222	R10H10.3	up	Autosome
WBGene00011231	R11A5.3	up	Autosome
WBGene00011232	R11A5.4	up	Autosome
WBGene00011259	miz-1	up	Autosome
WBGene00011274	R53.5	down	Autosome
WBGene00011281	R74.7	down	Autosome
WBGene00011291	R102.4	up	Autosome
WBGene00011309	R186.8	down	Autosome
WBGene00011320	T01C3.3	up	Autosome
WBGene00011330	T01D3.6	up	Autosome
WBGene00011353	T01H8.2	up	Autosome
WBGene00011376	gla-3	down	Autosome
WBGene00011393	T03D8.6	up	Autosome
WBGene00011404	T03F7.7	up	Autosome
WBGene00011408	T04A8.6	down	Autosome
WBGene00011464	T05B9.1	down	Autosome
WBGene00011474	aldo-1	up	Autosome
WBGene00011478	T05D4.5	up	Autosome
WBGene00011480	T05E11.3	up	Autosome
WBGene00011498	T05G5.1	up	Autosome
WBGene00011501	rmd-1	down	Autosome
WBGene00011527	cchl-1	down	Autosome
WBGene00011561	ttr-15	up	Autosome
WBGene00011564	ugt-50	up	X
WBGene00011599	T07G12.8	down	Autosome
WBGene00011615	lsd-1	up	X
WBGene00011638	ostb-1	down	Autosome
WBGene00011679	ucr-2.2	up	X
WBGene00011680	T10B10.3	up	X
WBGene00011730	drr-2	down	Autosome
WBGene00011731	acbp-5	down	Autosome
WBGene00011734	T12D8.6	down	Autosome
WBGene00011736	T12D8.9	up	Autosome
WBGene00011737	T12G3.1	up	Autosome
WBGene00011760	T13H5.6	up	Autosome
WBGene00011761	T13H5.8	down	Autosome
WBGene00011771	T14G8.3	up	X
WBGene00011820	T18D3.1	up	X
WBGene00011834	T19B10.6	down	Autosome
WBGene00011849	T19H5.4	up	Autosome
WBGene00011857	T20D3.3	down	Autosome
WBGene00011869	dod-6	down	Autosome
WBGene00011914	T22C1.3	down	Autosome
WBGene00011915	T22C1.4	down	Autosome
WBGene00011939	prmt-3	down	Autosome
WBGene00011941	T23B5.4	down	Autosome
WBGene00011977	T24B8.3	up	Autosome
WBGene00011981	T24C2.2	up	X
WBGene00011990	T24D5.2	up	X
WBGene00012000	T24H10.1	down	Autosome
WBGene00012005	2022-06-01	up	Autosome
WBGene00012017	T25C8.1	up	Autosome
WBGene00012058	T26F2.2	up	Autosome
WBGene00012091	T27E7.6	up	Autosome
WBGene00012093	T27E7.9	up	Autosome
WBGene00012095	pssy-2	down	Autosome
WBGene00012097	abcf-2	down	Autosome
WBGene00012104	T27F6.4	down	Autosome
WBGene00012111	T28A8.5	down	Autosome
WBGene00012121	T28C6.7	up	Autosome
WBGene00012139	T28F4.4	up	Autosome
WBGene00012158	ucr-2.1	up	X
WBGene00012175	W01C9.1	up	Autosome
WBGene00012176	W01C9.2	up	Autosome
WBGene00012179	W01D2.1	down	Autosome
WBGene00012193	vps-25	down	Autosome
WBGene00012198	W02B8.2	up	Autosome
WBGene00012222	W03C9.6	up	Autosome
WBGene00012234	W04A4.5	down	Autosome
WBGene00012253	clec-50	up	Autosome
WBGene00012258	W04G3.5	up	X
WBGene00012267	W04G5.7	up	Autosome
WBGene00012268	W04G5.8	up	Autosome
WBGene00012276	his-74	down	Autosome
WBGene00012295	W06B3.1	up	X
WBGene00012299	W06D11.1	up	X
WBGene00012306	W06F12.2	up	Autosome
WBGene00012315	immt-2	down	Autosome
WBGene00012326	W07E11.1	up	X
WBGene00012343	W08E3.2	up	Autosome
WBGene00012352	dkf-1	up	Autosome
WBGene00012354	W09C5.8	down	Autosome
WBGene00012358	W09D6.5	down	Autosome
WBGene00012370	W09G3.7	down	Autosome
WBGene00012381	Y2H9A.4	up	Autosome
WBGene00012385	Y5F2A.4	down	Autosome
WBGene00012390	Y6B3B.5	down	Autosome
WBGene00012398	Y6E2A.4	up	Autosome
WBGene00012399	Y6E2A.5	up	Autosome
WBGene00012400	Y6E2A.7	up	Autosome
WBGene00012407	Y7A5A.1	up	X
WBGene00012445	Y16B4A.2	up	X
WBGene00012458	ash-2	down	Autosome
WBGene00012481	Y18D10A.11	down	Autosome
WBGene00012512	ekl-5	up	X
WBGene00012513	Y26E6A.2	up	X
WBGene00012524	Y32B12B.4	down	Autosome
WBGene00012527	set-22	down	Autosome
WBGene00012551	Y37D8A.11	down	Autosome
WBGene00012552	Y37D8A.12	down	Autosome
WBGene00012553	cco-2	down	Autosome
WBGene00012605	Y38F1A.1	up	Autosome
WBGene00012618	dct-10	up	Autosome
WBGene00012621	Y38H6C.8	up	Autosome
WBGene00012624	fbxa-150	up	Autosome
WBGene00012626	Y38H6C.14	up	Autosome
WBGene00012632	Y38H6C.20	up	Autosome
WBGene00012663	hex-3	down	Autosome
WBGene00012674	bed-1	down	Autosome
WBGene00012692	Y39B6A.33	down	Autosome
WBGene00012698	Y39B6A.40	down	Autosome
WBGene00012701	Y39B6A.43	down	Autosome
WBGene00012738	eif-3.J	down	Autosome
WBGene00012739	Y40B1B.7	down	Autosome
WBGene00012740	Y40B1B.8	down	Autosome
WBGene00012756	Y41C4A.9	down	Autosome
WBGene00012758	Y41C4A.12	down	Autosome
WBGene00012795	Y43E12A.3	down	Autosome
WBGene00012798	Y43F4A.3	up	Autosome
WBGene00012813	Y43F8B.2	up	Autosome
WBGene00012829	Y43F8C.7	down	Autosome
WBGene00012864	Y45F3A.9	down	Autosome
WBGene00012879	fbxa-215	down	Autosome
WBGene00012907	cpt-1	down	Autosome
WBGene00012933	Y47D3A.22	down	Autosome
WBGene00012951	Y47H9C.8	down	Autosome
WBGene00012964	Y48A6B.3	down	Autosome
WBGene00012970	Y48A6B.9	down	Autosome
WBGene00012980	Y48B6A.6	up	Autosome
WBGene00012983	men-1	down	Autosome
WBGene00012996	Y48C3A.16	down	Autosome
WBGene00013030	Y49E10.4	down	Autosome
WBGene00013086	arrd-2	up	Autosome
WBGene00013096	mcd-1	down	Autosome
WBGene00013106	set-26	up	Autosome
WBGene00013133	Y53C10A.2	down	Autosome
WBGene00013146	Y53C12B.7	down	Autosome
WBGene00013208	Y54G9A.5	down	Autosome
WBGene00013216	Y54G11A.7	up	Autosome
WBGene00013244	Y56A3A.33	up	Autosome
WBGene00013248	Y57A10A.3	down	Autosome
WBGene00013250	Y57A10A.5	down	Autosome
WBGene00013253	Y57A10A.8	down	Autosome
WBGene00013273	Y57A10B.1	up	Autosome
WBGene00013289	tag-273	up	Autosome
WBGene00013294	Y57G11B.1	up	Autosome
WBGene00013311	Y57G11C.15	down	Autosome
WBGene00013327	Y57G11C.38	up	Autosome
WBGene00013404	fbxb-101	up	Autosome
WBGene00013415	Y64G10A.6	up	Autosome
WBGene00013431	Y66D12A.5	down	Autosome
WBGene00013469	Y68A4A.10	up	Autosome
WBGene00013482	Y69H2.7	down	Autosome
WBGene00013489	Y69H2.14	up	Autosome
WBGene00013509	Y71A12B.12	up	Autosome
WBGene00013530	Y73F8A.25	down	Autosome
WBGene00013553	Y75B8A.18	down	Autosome
WBGene00013561	Y75B8A.31	down	Autosome
WBGene00013567	Y75B12B.1	down	Autosome
WBGene00013569	bath-36	up	Autosome
WBGene00013587	Y80D3A.9	down	Autosome
WBGene00013623	fbxa-90	up	Autosome
WBGene00013632	Y105C5A.1	up	Autosome
WBGene00013639	Y105C5A.15	up	Autosome
WBGene00013676	ekl-4	down	Autosome
WBGene00013683	zoo-1	up	Autosome
WBGene00013729	Y111B2A.3	down	Autosome
WBGene00013739	Y111B2A.19	down	Autosome
WBGene00013750	Y113G7A.13	up	Autosome
WBGene00013755	fbxa-115	up	Autosome
WBGene00013766	prmt-1	down	Autosome
WBGene00013832	ZC15.3	up	Autosome
WBGene00013847	cls-3	up	Autosome
WBGene00013859	ZC247.1	up	Autosome
WBGene00013881	ZC410.3	down	Autosome
WBGene00013894	ZC434.8	down	Autosome
WBGene00013917	ZC504.3	up	X
WBGene00013937	ZK218.3	up	Autosome
WBGene00013949	ZK262.2	up	Autosome
WBGene00013969	tep-1	up	Autosome
WBGene00013997	ZK550.3	down	Autosome
WBGene00014012	riok-3	down	Autosome
WBGene00014014	ZK632.5	down	Autosome
WBGene00014016	ZK632.9	down	Autosome
WBGene00014086	ZK809.3	down	Autosome
WBGene00014095	ZK829.4	down	Autosome
WBGene00014096	ZK829.7	down	Autosome
WBGene00014109	ZK856.8	down	Autosome
WBGene00014148	ZK909.3	up	Autosome
WBGene00014159	arrd-4	up	Autosome
WBGene00014171	ZK970.1	up	Autosome
WBGene00014213	ZK1073.1	up	X
WBGene00014219	ZK1098.2	down	Autosome
WBGene00014222	ZK1098.5	down	Autosome
WBGene00014836	T09F5.12	up	Autosome
WBGene00015014	bath-24	up	Autosome
WBGene00015015	math-1	up	Autosome
WBGene00015041	cyp-34A6	up	Autosome
WBGene00015052	clec-52	up	Autosome
WBGene00015073	B0238.9	down	Autosome
WBGene00015075	B0238.11	down	Autosome
WBGene00015095	B0261.7	down	Autosome
WBGene00015136	B0304.4	down	Autosome
WBGene00015168	tag-320	up	X
WBGene00015177	B0416.1	up	X
WBGene00015180	B0416.4	up	X
WBGene00015223	B0507.6	up	Autosome
WBGene00015224	B0507.7	up	Autosome
WBGene00015225	B0507.8	up	Autosome
WBGene00015226	B0507.9	up	Autosome
WBGene00015227	B0507.10	up	Autosome
WBGene00015233	B0511.7	down	Autosome
WBGene00015235	cdc-26	down	Autosome
WBGene00015263	B0563.6	up	X
WBGene00015280	C01B10.6	up	Autosome
WBGene00015291	C01B12.8	down	Autosome
WBGene00015307	C01G5.5	down	Autosome
WBGene00015308	C01G5.6	down	Autosome
WBGene00015312	C01G8.1	down	Autosome
WBGene00015313	C01G8.6	down	Autosome
WBGene00015324	C02B8.6	up	X
WBGene00015326	ivd-1	down	Autosome
WBGene00015391	sdha-1	up	X
WBGene00015429	sor-3	up	X
WBGene00015430	C04E7.3	up	X
WBGene00015431	C04E7.4	up	X
WBGene00015456	C04G6.6	up	Autosome
WBGene00015468	C05D2.6	down	Autosome
WBGene00015529	C06E2.5	up	X
WBGene00015537	C06E4.8	up	Autosome
WBGene00015547	ain-1	up	X
WBGene00015551	C06G3.5	up	Autosome
WBGene00015552	C06G3.6	up	Autosome
WBGene00015561	C07A12.7	up	X
WBGene00015565	C07D8.6	up	X
WBGene00015592	C08D8.1	up	Autosome
WBGene00015598	fbxa-163	up	Autosome
WBGene00015600	fbxa-165	up	Autosome
WBGene00015601	fbxa-166	up	Autosome
WBGene00015602	fbxa-158	up	Autosome
WBGene00015611	C08F1.8	up	Autosome
WBGene00015646	mlt-10	up	Autosome
WBGene00015662	C10A4.1	up	X
WBGene00015676	C10E2.6	up	X
WBGene00015678	C10F3.4	up	Autosome
WBGene00015680	egal-1	up	Autosome
WBGene00015687	C10G11.7	down	Autosome
WBGene00015735	pdfr-1	up	Autosome
WBGene00015752	C14B9.2	up	Autosome
WBGene00015766	C14C11.2	down	Autosome
WBGene00015777	sfxn-2	up	X
WBGene00015778	C14F11.1	up	X
WBGene00015787	C15B12.6	up	X
WBGene00015789	syx-6	up	X
WBGene00015791	C15C7.5	up	X
WBGene00015793	C15C7.7	up	X
WBGene00015809	C16A3.4	down	Autosome
WBGene00015814	C16A3.10	down	Autosome
WBGene00015836	math-7	up	Autosome
WBGene00015837	math-8	up	Autosome
WBGene00015838	math-9	up	Autosome
WBGene00015849	C16C8.11	down	Autosome
WBGene00015866	C16E9.2	up	X
WBGene00015868	C16H3.3	up	X
WBGene00015885	fbxa-65	up	Autosome
WBGene00015913	C17F4.7	up	Autosome
WBGene00015916	C17G10.2	down	Autosome
WBGene00015920	C17G10.9	down	Autosome
WBGene00015922	C17H11.2	up	X
WBGene00015938	C17H12.13	down	Autosome
WBGene00015955	C18B2.4	up	X
WBGene00015956	C18B2.5	up	X
WBGene00015974	C18E3.5	down	Autosome
WBGene00015975	cas-2	down	Autosome
WBGene00015976	C18E3.9	down	Autosome
WBGene00016006	fln-2	up	X
WBGene00016009	C23F12.4	up	X
WBGene00016055	C24D10.4	down	Autosome
WBGene00016061	C24G6.6	up	Autosome
WBGene00016072	C24H12.2	up	Autosome
WBGene00016087	C25A11.2	up	X
WBGene00016102	C25F6.1	up	X
WBGene00016115	mdt-26	down	Autosome
WBGene00016121	C25H3.12	down	Autosome
WBGene00016131	C26B9.1	up	X
WBGene00016134	C26B9.5	up	X
WBGene00016171	C27F2.10	down	Autosome
WBGene00016182	C28C12.12	down	Autosome
WBGene00016188	sec-15	up	X
WBGene00016190	C28G1.5	up	X
WBGene00016191	C28G1.6	up	X
WBGene00016195	C28H8.4	down	Autosome
WBGene00016210	C29F5.1	up	Autosome
WBGene00016221	C29F9.6	up	Autosome
WBGene00016243	tag-319	down	Autosome
WBGene00016251	C30E1.2	up	X
WBGene00016252	C30E1.3	up	X
WBGene00016256	C30E1.7	up	X
WBGene00016262	C30F12.3	down	Autosome
WBGene00016266	C30F12.7	up	Autosome
WBGene00016272	C30G4.7	up	X
WBGene00016325	C32E8.9	down	Autosome
WBGene00016336	C33C12.4	up	Autosome
WBGene00016341	C33C12.9	down	Autosome
WBGene00016346	fbxa-120	up	X
WBGene00016392	sdha-2	down	Autosome
WBGene00016393	C34B2.8	down	Autosome
WBGene00016402	C34D4.10	down	Autosome
WBGene00016406	C34D10.1	up	X
WBGene00016415	C34F11.3	up	Autosome
WBGene00016443	C35D10.6	down	Autosome
WBGene00016445	C35D10.8	down	Autosome
WBGene00016446	C35D10.10	down	Autosome
WBGene00016452	C35D10.17	down	Autosome
WBGene00016469	C36B7.6	up	X
WBGene00016485	C36C9.1	up	X
WBGene00016488	C36C9.5	up	X
WBGene00016489	C36E6.1	up	X
WBGene00016493	C37A2.7	down	Autosome
WBGene00016507	C37H5.3	up	Autosome
WBGene00016511	C37H5.13	up	Autosome
WBGene00016550	C40A11.7	up	Autosome
WBGene00016551	C40A11.8	up	Autosome
WBGene00016558	C41A3.1	up	X
WBGene00016564	C41D11.5	down	Autosome
WBGene00016574	C41H7.4	up	Autosome
WBGene00016575	C41H7.5	up	Autosome
WBGene00016576	C41H7.6	up	Autosome
WBGene00016585	oac-59	up	Autosome
WBGene00016586	C42C1.8	down	Autosome
WBGene00016591	C42C1.13	down	Autosome
WBGene00016601	acin-1	down	Autosome
WBGene00016620	C43H6.7	up	X
WBGene00016622	C43H8.2	down	Autosome
WBGene00016631	C44B7.11	up	Autosome
WBGene00016632	C44B7.12	down	Autosome
WBGene00016639	C44B12.6	up	Autosome
WBGene00016642	C44C1.2	up	X
WBGene00016661	C45B2.6	up	X
WBGene00016698	C46A5.1	up	Autosome
WBGene00016702	C46A5.6	down	Autosome
WBGene00016704	C46C11.1	up	X
WBGene00016717	math-22	up	Autosome
WBGene00016718	math-23	up	Autosome
WBGene00016719	math-24	up	Autosome
WBGene00016725	C46H3.2	up	X
WBGene00016788	C49G7.10	up	Autosome
WBGene00016790	C49H3.3	down	Autosome
WBGene00016799	C50C3.1	down	Autosome
WBGene00016844	C50F7.4	down	Autosome
WBGene00016862	C52A10.1	up	Autosome
WBGene00016867	C52B9.4	up	X
WBGene00016868	C52B9.8	up	X
WBGene00016879	C52D10.12	up	Autosome
WBGene00016883	C52E2.4	up	Autosome
WBGene00016892	C53A3.2	up	Autosome
WBGene00016902	C53D5.1	up	Autosome
WBGene00016934	mboa-3	up	X
WBGene00016935	ifta-1	up	X
WBGene00016970	C56E6.2	up	Autosome
WBGene00016984	C56G3.1	up	X
WBGene00016985	C56G3.2	up	X
WBGene00016995	D1005.1	up	X
WBGene00016997	D1005.3	up	X
WBGene00017005	D1007.8	down	Autosome
WBGene00017046	utx-1	up	X
WBGene00017072	D2096.5	up	Autosome
WBGene00017075	D2096.8	down	Autosome
WBGene00017101	E02H9.3	up	Autosome
WBGene00017121	cyc-2.1	down	Autosome
WBGene00017137	pink-1	down	Autosome
WBGene00017177	F02E8.4	up	X
WBGene00017178	atg-16.1	up	X
WBGene00017210	F07E5.5	down	Autosome
WBGene00017214	F07E5.9	up	Autosome
WBGene00017238	F08B4.7	down	Autosome
WBGene00017241	F08C6.2	up	X
WBGene00017244	apy-1	up	X
WBGene00017245	F08D12.1	down	Autosome
WBGene00017296	F09E10.6	up	X
WBGene00017300	F09F7.3	down	Autosome
WBGene00017342	F10D7.5	up	X
WBGene00017356	F10E9.4	down	Autosome
WBGene00017357	F10E9.5	down	Autosome
WBGene00017373	F10G7.10	up	Autosome
WBGene00017400	stg-2	up	X
WBGene00017419	F13B9.1	up	X
WBGene00017420	F13B9.2	up	X
WBGene00017445	F14B8.2	up	X
WBGene00017456	F14D2.8	down	Autosome
WBGene00017459	F14D2.11	down	Autosome
WBGene00017463	F14D12.1	up	X
WBGene00017482	set-9	up	Autosome
WBGene00017504	F16B4.2	up	Autosome
WBGene00017507	F16B4.5	up	Autosome
WBGene00017508	F16B4.6	up	Autosome
WBGene00017515	F16F9.4	up	X
WBGene00017530	F16H11.1	up	X
WBGene00017532	F16H11.3	up	X
WBGene00017563	F18C5.10	up	Autosome
WBGene00017571	tag-279	up	X
WBGene00017582	F18G5.6	up	X
WBGene00017586	F19B10.4	up	Autosome
WBGene00017591	F19C7.1	up	Autosome
WBGene00017620	F20A1.9	down	Autosome
WBGene00017628	F20B6.4	up	X
WBGene00017629	F20B6.5	up	X
WBGene00017642	F20D12.2	down	Autosome
WBGene00017659	F21C10.10	up	Autosome
WBGene00017673	F21F3.3	up	Autosome
WBGene00017674	F21F3.4	down	Autosome
WBGene00017691	ilys-5	up	X
WBGene00017696	polk-1	down	Autosome
WBGene00017705	F22E5.6	up	Autosome
WBGene00017711	F22E5.13	up	Autosome
WBGene00017728	F22H10.4	up	X
WBGene00017744	fbxc-54	up	Autosome
WBGene00017758	F23H11.2	down	Autosome
WBGene00017759	F23H11.3	down	Autosome
WBGene00017777	F25B5.6	down	Autosome
WBGene00017782	F25E5.1	up	Autosome
WBGene00017816	F26B1.2	down	Autosome
WBGene00017829	F26F4.9	down	Autosome
WBGene00017832	kbp-2	down	Autosome
WBGene00017864	pcca-1	up	X
WBGene00017892	F28B4.3	up	X
WBGene00017898	F28C10.3	up	X
WBGene00017939	F31A3.5	up	X
WBGene00017941	F31A9.2	up	X
WBGene00017949	F31D5.6	up	Autosome
WBGene00017974	vps-41	up	X
WBGene00017984	F32D1.5	down	Autosome
WBGene00017985	F32D1.6	down	Autosome
WBGene00017990	F32E10.2	down	Autosome
WBGene00017992	F32E10.5	down	Autosome
WBGene00017993	F32E10.6	down	Autosome
WBGene00018019	F33H12.1	up	Autosome
WBGene00018037	chtl-1	up	X
WBGene00018071	F35H10.6	down	Autosome
WBGene00018073	F35H10.10	up	Autosome
WBGene00018075	tbc-11	up	X
WBGene00018076	F35H12.4	up	X
WBGene00018099	ztf-28	down	Autosome
WBGene00018100	math-26	up	Autosome
WBGene00018102	math-28	up	Autosome
WBGene00018103	F36H5.4	up	Autosome
WBGene00018105	clec-19	up	Autosome
WBGene00018106	F36H5.8	up	Autosome
WBGene00018118	F36H12.2	down	Autosome
WBGene00018131	F37A4.1	down	Autosome
WBGene00018132	F37A4.2	down	Autosome
WBGene00018137	bath-41	down	Autosome
WBGene00018140	F37B4.10	up	Autosome
WBGene00018145	F37C4.5	up	Autosome
WBGene00018161	F38A5.2	down	Autosome
WBGene00018193	F39C12.1	up	X
WBGene00018203	F39F10.3	up	X
WBGene00018238	F40F4.7	up	X
WBGene00018259	F41B4.3	up	X
WBGene00018269	acs-11	down	Autosome
WBGene00018302	F41G3.6	down	Autosome
WBGene00018305	exos-8	down	Autosome
WBGene00018308	F41G4.4	up	X
WBGene00018309	F41G4.5	up	X
WBGene00018310	F41G4.7	up	X
WBGene00018318	F41H10.5	down	Autosome
WBGene00018330	elks-1	up	Autosome
WBGene00018345	F42C5.3	up	Autosome
WBGene00018385	F43C11.8	up	Autosome
WBGene00018386	F43C11.9	up	Autosome
WBGene00018398	sptl-2	up	Autosome
WBGene00018417	F44E2.3	down	Autosome
WBGene00018433	F45C12.2	up	Autosome
WBGene00018435	btb-9	up	Autosome
WBGene00018442	sdz-18	up	Autosome
WBGene00018446	F45C12.15	up	Autosome
WBGene00018447	F45C12.16	up	Autosome
WBGene00018455	fbxc-42	up	Autosome
WBGene00018473	F45E4.11	down	Autosome
WBGene00018483	F45F2.11	down	Autosome
WBGene00018502	F46F5.11	up	Autosome
WBGene00018509	F46F11.6	down	Autosome
WBGene00018516	tag-257	up	X
WBGene00018519	F46H5.3	up	X
WBGene00018520	F46H5.4	up	X
WBGene00018522	F46H5.7	up	X
WBGene00018533	F47B7.2	up	X
WBGene00018537	F47B7.6	up	X
WBGene00018543	ugt-32	up	Autosome
WBGene00018564	F47D12.9	down	Autosome
WBGene00018578	F47G3.3	up	X
WBGene00018604	F48E3.3	up	X
WBGene00018608	F48E3.9	up	X
WBGene00018613	skpt-1	down	Autosome
WBGene00018634	F49E7.2	up	X
WBGene00018636	F49E8.2	down	Autosome
WBGene00018647	F49F1.7	up	Autosome
WBGene00018657	acl-4	up	X
WBGene00018661	F52C6.4	down	Autosome
WBGene00018662	math-30	up	Autosome
WBGene00018665	bath-4	down	Autosome
WBGene00018668	bath-2	down	Autosome
WBGene00018671	F52C6.14	up	Autosome
WBGene00018678	F52C12.1	down	Autosome
WBGene00018679	F52C12.2	down	Autosome
WBGene00018689	F52D2.7	up	X
WBGene00018698	vha-18	down	Autosome
WBGene00018701	pccb-1	up	X
WBGene00018702	F52E4.5	up	X
WBGene00018703	sec-3	up	X
WBGene00018710	F52G3.1	up	X
WBGene00018714	F52H2.1	up	X
WBGene00018717	F52H2.5	up	X
WBGene00018719	F52H2.7	up	X
WBGene00018721	polh-1	down	Autosome
WBGene00018734	F53A10.2	up	Autosome
WBGene00018740	tra-4	up	X
WBGene00018777	F53H1.3	down	Autosome
WBGene00018788	shc-1	up	Autosome
WBGene00018803	fbxa-24	up	Autosome
WBGene00018837	F54G2.1	up	X
WBGene00018846	eef-1B.1	down	Autosome
WBGene00018854	F55A4.2	up	X
WBGene00018857	stau-1	up	X
WBGene00018866	F55A12.8	down	Autosome
WBGene00018878	glit-1	up	X
WBGene00018928	F56B3.2	down	Autosome
WBGene00018935	skr-18	down	Autosome
WBGene00018971	clec-67	up	Autosome
WBGene00018984	F56F10.1	up	X
WBGene00018987	lgl-1	up	X
WBGene00018991	F56F11.4	down	Autosome
WBGene00019003	F57B10.5	down	Autosome
WBGene00019017	F57F4.4	up	Autosome
WBGene00019038	F58E1.7	up	Autosome
WBGene00019061	F58F12.1	down	Autosome
WBGene00019064	myo-5	up	Autosome
WBGene00019069	lgc-30	up	Autosome
WBGene00019070	F58H7.5	up	Autosome
WBGene00019120	npl-4.1	down	Autosome
WBGene00019124	F59E12.9	down	Autosome
WBGene00019166	tat-2	up	Autosome
WBGene00019170	H06I04.6	up	Autosome
WBGene00019189	H11L12.1	up	X
WBGene00019196	H14A12.3	down	Autosome
WBGene00019205	kcc-2	up	Autosome
WBGene00019207	H17B01.1	up	Autosome
WBGene00019208	lips-14	up	Autosome
WBGene00019209	H17B01.4	down	Autosome
WBGene00019246	rpb-5	down	Autosome
WBGene00019247	syp-4	down	Autosome
WBGene00019248	H27M09.5	down	Autosome
WBGene00019250	H28G03.2	up	X
WBGene00019254	H31G24.3	down	Autosome
WBGene00019261	H34I24.2	up	Autosome
WBGene00019322	ahcy-1	down	Autosome
WBGene00019327	zip-2	up	Autosome
WBGene00019331	dos-3	up	Autosome
WBGene00019343	K02F6.9	up	Autosome
WBGene00019344	K02G10.1	up	X
WBGene00019354	K03B4.2	down	Autosome
WBGene00019429	K06A5.1	down	Autosome
WBGene00019433	acdh-3	down	Autosome
WBGene00019439	K06B9.2	down	Autosome
WBGene00019448	K06C4.17	up	Autosome
WBGene00019458	K06H7.7	down	Autosome
WBGene00019465	acl-14	up	Autosome
WBGene00019466	K07B1.6	down	Autosome
WBGene00019468	K07B1.8	up	Autosome
WBGene00019490	K07E3.1	up	X
WBGene00019491	K07E3.2	up	X
WBGene00019511	K08A2.1	up	Autosome
WBGene00019513	K08A2.4	up	Autosome
WBGene00019537	K08D12.3	down	Autosome
WBGene00019543	cif-1	down	Autosome
WBGene00019544	K08F11.5	down	Autosome
WBGene00019554	K09C4.10	up	X
WBGene00019564	K09D9.1	up	Autosome
WBGene00019569	K09D9.12	up	Autosome
WBGene00019576	K09E3.5	up	X
WBGene00019577	K09E3.6	up	X
WBGene00019589	K09F6.6	up	Autosome
WBGene00019593	K09F6.10	up	Autosome
WBGene00019611	K10B3.5	up	X
WBGene00019620	fah-1	up	X
WBGene00019631	K10D2.5	down	Autosome
WBGene00019636	gsto-3	up	Autosome
WBGene00019645	K11D12.5	up	Autosome
WBGene00019649	K11D12.9	up	Autosome
WBGene00019657	K11G12.6	up	X
WBGene00019666	sago-1	up	Autosome
WBGene00019678	K12H4.3	down	Autosome
WBGene00019682	K12H4.7	up	Autosome
WBGene00019724	M02B7.2	down	Autosome
WBGene00019729	M02D8.3	up	X
WBGene00019730	asns-2	up	X
WBGene00019733	M02E1.1	up	X
WBGene00019738	clec-265	up	X
WBGene00019749	M03A8.3	up	X
WBGene00019760	calu-1	up	X
WBGene00019769	M04F3.3	down	Autosome
WBGene00019779	M60.2	up	X
WBGene00019792	M116.5	down	Autosome
WBGene00019825	R02D3.8	down	Autosome
WBGene00019827	mop-25.1	up	X
WBGene00019830	hrg-1	up	X
WBGene00019848	R03G5.7	up	X
WBGene00019858	R03H10.6	up	Autosome
WBGene00019863	R04A9.3	up	X
WBGene00019864	R04A9.5	up	X
WBGene00019871	R04E5.8	up	X
WBGene00019872	R04E5.9	up	X
WBGene00019878	R05D3.3	down	Autosome
WBGene00019900	R05G6.7	down	Autosome
WBGene00019912	R06B10.1	up	Autosome
WBGene00019938	R07E4.5	up	X
WBGene00019946	R08C7.2	down	Autosome
WBGene00019947	htz-1	down	Autosome
WBGene00019959	R08E3.3	up	X
WBGene00019967	cyp-33C8	up	Autosome
WBGene00019968	R08F11.4	up	Autosome
WBGene00019980	R09B5.12	up	Autosome
WBGene00019987	R09F10.3	up	X
WBGene00019989	R09F10.8	up	X
WBGene00019991	R09H3.3	up	X
WBGene00020011	R11G1.2	up	X
WBGene00020035	egg-5	down	Autosome
WBGene00020038	R12E2.13	down	Autosome
WBGene00020090	R119.5	up	Autosome
WBGene00020104	R148.5	up	Autosome
WBGene00020128	R193.2	up	X
WBGene00020142	aak-2	up	X
WBGene00020146	T01C8.5	up	X
WBGene00020160	igcm-3	up	X
WBGene00020183	T03D3.5	up	Autosome
WBGene00020227	T05A8.1	up	Autosome
WBGene00020235	T05A12.4	up	Autosome
WBGene00020251	T05C1.4	up	Autosome
WBGene00020269	T05H4.6a	down	Autosome
WBGene00020273	T05H4.10	down	Autosome
WBGene00020275	atp-4	down	Autosome
WBGene00020293	T06D4.4	up	Autosome
WBGene00020297	T07A9.9	down	Autosome
WBGene00020322	T07F12.2	up	X
WBGene00020326	math-38	up	Autosome
WBGene00020334	atg-11	up	X
WBGene00020347	T08B2.7	down	Autosome
WBGene00020358	math-39	up	Autosome
WBGene00020359	math-40	up	Autosome
WBGene00020360	math-41	up	Autosome
WBGene00020363	fbxa-3	up	Autosome
WBGene00020364	T08E11.8	up	Autosome
WBGene00020366	acdh-10	up	X
WBGene00020369	T08H10.1	up	Autosome
WBGene00020389	T10B5.3	down	Autosome
WBGene00020391	cct-7	down	Autosome
WBGene00020417	nuo-2	down	Autosome
WBGene00020443	esyt-2	up	Autosome
WBGene00020450	fbxa-10	up	Autosome
WBGene00020457	fbxa-67	up	Autosome
WBGene00020459	fbxa-23	up	Autosome
WBGene00020486	T13C5.6	up	X
WBGene00020491	T13G4.4	up	X
WBGene00020496	spat-3	up	X
WBGene00020499	T14B4.2	down	Autosome
WBGene00020504	T14E8.1	up	X
WBGene00020507	vha-15	up	X
WBGene00020508	T14F9.2	up	X
WBGene00020510	T14G11.1	up	X
WBGene00020511	immt-1	up	X
WBGene00020579	T19D12.4	up	Autosome
WBGene00020588	T19H12.2	down	Autosome
WBGene00020596	oga-1	up	X
WBGene00020630	T20F7.1	up	X
WBGene00020633	aakg-2	up	X
WBGene00020649	sma-10	up	Autosome
WBGene00020687	ruvb-2	down	Autosome
WBGene00020701	T22F7.1	up	Autosome
WBGene00020710	T23B3.2	up	Autosome
WBGene00020729	T23E1.2	down	Autosome
WBGene00020757	ucr-2.3	down	Autosome
WBGene00020761	T24C4.5	down	Autosome
WBGene00020784	tat-4	up	Autosome
WBGene00020812	acdh-7	up	X
WBGene00020825	T26A8.2	down	Autosome
WBGene00020827	T26A8.4	down	Autosome
WBGene00020834	T27A1.2	up	Autosome
WBGene00020838	T27A3.1	up	Autosome
WBGene00020861	T27E4.1	up	Autosome
WBGene00020867	shc-2	up	Autosome
WBGene00020875	T28A11.13	up	Autosome
WBGene00020883	fbxa-64	up	Autosome
WBGene00020894	T28D9.1	down	Autosome
WBGene00020895	T28D9.3	down	Autosome
WBGene00020915	nol-5	down	Autosome
WBGene00020950	W02F12.5	down	Autosome
WBGene00020994	W03F8.4	down	Autosome
WBGene00021014	W03G9.2	down	Autosome
WBGene00021015	W03G9.3	down	Autosome
WBGene00021026	W04C9.4	down	Autosome
WBGene00021036	W05F2.4	up	Autosome
WBGene00021039	W05F2.7	up	Autosome
WBGene00021044	W05H7.1	up	X
WBGene00021047	zfp-3	up	X
WBGene00021048	W05H9.1	up	X
WBGene00021049	W05H9.2	up	X
WBGene00021050	W05H9.3	up	X
WBGene00021051	W05H9.4	up	X
WBGene00021056	W06B4.1	down	Autosome
WBGene00021076	W07E6.5	down	Autosome
WBGene00021081	W08A12.4	up	Autosome
WBGene00021159	Y4C6B.5	up	Autosome
WBGene00021186	Y9D1A.1	up	Autosome
WBGene00021192	Y14H12B.2	down	Autosome
WBGene00021208	Y18H1A.2	down	Autosome
WBGene00021264	fbxa-13	up	Autosome
WBGene00021270	Y23H5A.3	down	Autosome
WBGene00021296	Y25C1A.13	up	Autosome
WBGene00021311	Y32H12A.2	down	Autosome
WBGene00021314	Y32H12A.6	down	Autosome
WBGene00021323	Y34B4A.7	up	X
WBGene00021340	Y34F4.5	down	Autosome
WBGene00021348	moag-4	down	Autosome
WBGene00021350	Y37E3.8	down	Autosome
WBGene00021355	Y37E3.17	down	Autosome
WBGene00021415	nsy-4	up	Autosome
WBGene00021420	trap-3	down	Autosome
WBGene00021441	Y39A3CL.3	down	Autosome
WBGene00021442	Y39A3CL.4	down	Autosome
WBGene00021451	mltn-8	up	Autosome
WBGene00021466	Y39G10AR.8	down	Autosome
WBGene00021469	Y39G10AR.11	down	Autosome
WBGene00021471	Y39G10AR.15	down	Autosome
WBGene00021485	Y40A1A.3	up	X
WBGene00021486	lbp-9	down	Autosome
WBGene00021508	Y41D4A.6	down	Autosome
WBGene00021562	nuo-5	down	Autosome
WBGene00021603	clec-204	up	Autosome
WBGene00021605	Y46H3C.5	up	Autosome
WBGene00021606	Y46H3C.6	up	Autosome
WBGene00021651	Y47G6A.27	down	Autosome
WBGene00021654	Y47G7B.2	up	Autosome
WBGene00021655	Y48A5A.1	down	Autosome
WBGene00021673	Y48G1BM.8	up	Autosome
WBGene00021687	Y48G8AL.7	down	Autosome
WBGene00021704	Y48G9A.11	down	Autosome
WBGene00021713	Y49F6A.5	up	Autosome
WBGene00021715	Y49F6B.2	down	Autosome
WBGene00021721	Y49F6B.9	down	Autosome
WBGene00021768	Y51F10.7	up	Autosome
WBGene00021785	Y51H7C.7	down	Autosome
WBGene00021790	Y51H7C.12	up	Autosome
WBGene00021793	Y52D5A.2	up	Autosome
WBGene00021840	Y54E10BR.1	down	Autosome
WBGene00021841	Y54E10BR.2	down	Autosome
WBGene00021846	ztf-23	down	Autosome
WBGene00021852	Y54F10AM.8	up	Autosome
WBGene00021858	Y54F10BM.3	down	Autosome
WBGene00021866	Y54F10BM.12	down	Autosome
WBGene00021872	clec-85	up	Autosome
WBGene00021903	Y55B1AL.1	up	Autosome
WBGene00021904	Y55B1AL.2	down	Autosome
WBGene00021906	Y55B1AR.2	down	Autosome
WBGene00021912	Y55B1BR.2	up	Autosome
WBGene00021920	Y55F3AM.1	down	Autosome
WBGene00021925	immp-2	down	Autosome
WBGene00021950	cutl-26	up	Autosome
WBGene00021959	Y57E12AL.6	down	Autosome
WBGene00021960	Y57E12AM.1	down	Autosome
WBGene00021986	Y59C2A.3	down	Autosome
WBGene00022010	catp-7	up	Autosome
WBGene00022029	Y65B4A.6	down	Autosome
WBGene00022042	Y65B4BR.5	down	Autosome
WBGene00022046	Y66H1A.4	down	Autosome
WBGene00022048	fln-1	down	Autosome
WBGene00022053	Y67D2.3	down	Autosome
WBGene00022055	Y67D2.5	down	Autosome
WBGene00022058	Y67D8A.1	down	Autosome
WBGene00022060	Y67D8A.3	down	Autosome
WBGene00022067	Y67D8C.3	down	Autosome
WBGene00022100	Y69A2AR.31	up	Autosome
WBGene00022107	Y71F9AL.1	down	Autosome
WBGene00022123	Y71F9AR.2	down	Autosome
WBGene00022127	yop-1	down	Autosome
WBGene00022139	tub-2	up	Autosome
WBGene00022141	Y71G12B.1	down	Autosome
WBGene00022143	Y71G12B.3	up	Autosome
WBGene00022170	Y71H2AM.5	down	Autosome
WBGene00022173	set-27	down	Autosome
WBGene00022201	Y71H10B.1	up	X
WBGene00022214	Y73B3A.12	up	X
WBGene00022231	tyr-6	up	Autosome
WBGene00022232	exos-2	down	Autosome
WBGene00022248	Y73B6BL.27	up	Autosome
WBGene00022252	Y73B6BL.31	up	Autosome
WBGene00022253	hrpf-2	down	Autosome
WBGene00022279	sesn-1	up	Autosome
WBGene00022297	Y76B12C.3	down	Autosome
WBGene00022336	Y82E9BR.3	down	Autosome
WBGene00022348	Y82E9BR.16	down	Autosome
WBGene00022354	Y82E9BR.22	down	Autosome
WBGene00022382	Y94H6A.10	up	Autosome
WBGene00022393	Y97E10AL.2	down	Autosome
WBGene00022398	Y97E10AR.3	down	Autosome
WBGene00022399	Y97E10AR.4	down	Autosome
WBGene00022401	Y97E10AR.6	down	Autosome
WBGene00022410	Y97E10C.1	up	Autosome
WBGene00022431	set-33	up	X
WBGene00022455	Y110A7A.4	down	Autosome
WBGene00022462	Y110A7A.15	down	Autosome
WBGene00022489	Y119D3B.12	down	Autosome
WBGene00022492	dss-1	down	Autosome
WBGene00022497	Y119D3B.21	up	Autosome
WBGene00022501	ZC8.6	up	X
WBGene00022505	ZC21.3	down	Autosome
WBGene00022519	ZC123.4	up	Autosome
WBGene00022523	ZC132.4	up	Autosome
WBGene00022545	ZC196.1	up	Autosome
WBGene00022546	ZC196.2	up	Autosome
WBGene00022547	ZC196.3	up	Autosome
WBGene00022548	ZC196.4	up	Autosome
WBGene00022550	ZC196.6	up	Autosome
WBGene00022554	ZC204.2	up	Autosome
WBGene00022569	ZC239.6	up	Autosome
WBGene00022570	sdz-35	up	Autosome
WBGene00022613	ZC449.3	up	X
WBGene00022620	ZC477.5	down	Autosome
WBGene00022644	dod-19	up	Autosome
WBGene00022645	ZK6.11	up	Autosome
WBGene00022663	glrx-21	down	Autosome
WBGene00022666	ZK154.4	up	X
WBGene00022668	ZK154.6	up	X
WBGene00022674	ZK177.9	up	Autosome
WBGene00022682	ZK185.2	up	Autosome
WBGene00022689	math-48	up	Autosome
WBGene00022690	math-49	up	Autosome
WBGene00022737	ZK418.8	down	Autosome
WBGene00022742	ZK430.7	down	Autosome
WBGene00022743	mlt-7	up	Autosome
WBGene00022745	ZK470.2	up	X
WBGene00022748	ZK484.1	down	Autosome
WBGene00022762	ZK546.5	down	Autosome
WBGene00022769	ZK563.5	up	X
WBGene00022783	tomm-7	down	Autosome
WBGene00022830	ZK973.1	down	Autosome
WBGene00022834	ZK973.8	down	Autosome
WBGene00022836	ZK973.11	down	Autosome
WBGene00022851	ZK1127.4	down	Autosome
WBGene00022853	ZK1127.6	down	Autosome
WBGene00022858	ZK1193.2	up	X
WBGene00023497	lin-15B	up	X
WBGene00023498	lin-15A	up	X
WBGene00043057	M142.8	down	Autosome
WBGene00043068	F32E10.9	down	Autosome
WBGene00044005	F37C12.18	up	Autosome
WBGene00044020	ZK856.14	up	Autosome
WBGene00044061	tbc-12	up	X
WBGene00044070	set-18	up	Autosome
WBGene00044071	tag-233	up	X
WBGene00044181	F09C6.11	up	Autosome
WBGene00044212	Y68A4A.13	up	Autosome
WBGene00044313	M02D8.7	up	X
WBGene00044318	tag-267	down	Autosome
WBGene00044415	C08E3.14	up	Autosome
WBGene00044420	C50D2.10	down	Autosome
WBGene00044466	Y48A5A.3	down	Autosome
WBGene00044493	Y54G2A.50	down	Autosome
WBGene00044495	Y54G2A.40	up	Autosome
WBGene00044527	Y39H10B.2	up	Autosome
WBGene00044541	K09H11.11	up	Autosome
WBGene00044586	Y61A9LA.12	up	Autosome
WBGene00044690	M02B7.7	down	Autosome
WBGene00044698	K09F5.6	up	X
WBGene00044709	C17H1.14	up	Autosome
WBGene00044787	C54D10.12	up	Autosome
WBGene00045050	ZC15.10	up	Autosome
WBGene00045237	mrt-1	down	Autosome
WBGene00045392	F26D11.12	up	Autosome
WBGene00045393	F26D11.13	up	Autosome
WBGene00045401	T26F2.3	up	Autosome
WBGene00045407	T07D4.5	up	Autosome
WBGene00045434	Y95D11A.3	down	Autosome
WBGene00045435	Y34B4A.11	up	X
WBGene00045483	F56H1.7	down	Autosome
WBGene00045495	F11C1.7	up	X
WBGene00050899	T10C6.15	up	Autosome
WBGene00050929	F58D12.5	up	Autosome
WBGene00050944	C14A11.9	up	X
WBGene00077453	Y62F5A.12	down	Autosome
WBGene00077769	F33E2.10	up	Autosome
WBGene00086560	ZK355.8	up	Autosome
WBGene00138721	C54D10.14	up	Autosome
WBGene00185102	Y105C5A.1268	up	Autosome
WBGene00185118	K02E2.11	up	Autosome
WBGene00194695	B0462.5	up	Autosome
WBGene00194902	Y39H10B.3	up	Autosome
WBGene00194906	Y53C12A.11	down	Autosome
WBGene00195190	T04A6.5	down	Autosome

## Sheet: met-1 vs wt PGCs
Wormbase_ID	Public_ID	change_mutant_vs_wt	X_vs_Autosome
WBGene00000210	asg-2	up	X
WBGene00000779	cpn-3	down	Autosome
WBGene00000857	cwn-1	down	Autosome
WBGene00001008	dlk-1	up	Autosome
WBGene00001082	dpy-23	up	X
WBGene00001086	dpy-27	up	Autosome
WBGene00001129	dyf-13	up	Autosome
WBGene00001583	gfi-3	up	X
WBGene00002203	kin-20	down	X
WBGene00003495	mup-2	down	X
WBGene00003934	pat-10	down	Autosome
WBGene00004086	pph-4.2	down	Autosome
WBGene00004314	rbc-2	down	Autosome
WBGene00004334	ref-1	up	Autosome
WBGene00004404	rom-5	down	Autosome
WBGene00004963	spe-9	up	Autosome
WBGene00006494	hke-4.2	up	X
WBGene00006714	ubc-19	down	Autosome
WBGene00006789	unc-54	down	Autosome
WBGene00007516	C11E4.1	down	X
WBGene00007589	C14C10.6	down	Autosome
WBGene00007614	gnrr-2	down	Autosome
WBGene00007771	C27C12.1	down	X
WBGene00007847	C31E10.6	up	X
WBGene00008471	E03H4.3	up	Autosome
WBGene00008994	F21A3.4	up	Autosome
WBGene00009365	F33H1.4	down	Autosome
WBGene00009865	F49B2.6	down	Autosome
WBGene00010172	oac-36	up	Autosome
WBGene00011692	T10G3.1	up	Autosome
WBGene00011869	dod-6	down	Autosome
WBGene00012139	T28F4.4	up	Autosome
WBGene00012191	W02A2.8	up	Autosome
WBGene00012357	W09D6.4	up	Autosome
WBGene00012758	Y41C4A.12	down	Autosome
WBGene00013007	Y48E1B.8	up	Autosome
WBGene00013133	Y53C10A.2	down	Autosome
WBGene00013690	Y105E8B.5	down	Autosome
WBGene00014198	ZK1053.3	down	Autosome
WBGene00015638	C09E7.4	up	Autosome
WBGene00016103	dpyd-1	down	X
WBGene00016273	C30G12.1	up	Autosome
WBGene00016489	C36E6.1	up	X
WBGene00016584	C42C1.6	down	Autosome
WBGene00016651	C44E4.2	down	Autosome
WBGene00016890	C52E12.6	up	Autosome
WBGene00016906	C53D5.5	up	Autosome
WBGene00018105	clec-19	up	Autosome
WBGene00018318	F41H10.5	down	Autosome
WBGene00018473	F45E4.11	down	Autosome
WBGene00018671	F52C6.14	up	Autosome
WBGene00019159	H05C05.3	up	Autosome
WBGene00019168	H06I04.3	down	Autosome
WBGene00019871	R04E5.8	up	X
WBGene00019946	R08C7.2	down	Autosome
WBGene00020116	R155.2	up	Autosome
WBGene00020507	vha-15	up	X
WBGene00020808	T25F10.6	down	Autosome
WBGene00020825	T26A8.2	down	Autosome
WBGene00020895	T28D9.3	down	Autosome
WBGene00020900	T28F2.1	up	Autosome
WBGene00021118	clec-125	up	Autosome
WBGene00021296	Y25C1A.13	up	Autosome
WBGene00021339	Y34F4.4	up	Autosome
WBGene00021358	Y37E11AL.2	up	Autosome
WBGene00021471	Y39G10AR.15	down	Autosome
WBGene00021654	Y47G7B.2	up	Autosome
WBGene00021960	Y57E12AM.1	down	Autosome
WBGene00022085	Y69A2AR.14	up	Autosome
WBGene00022123	Y71F9AR.2	down	Autosome
WBGene00022158	Y71G12B.23	up	Autosome
WBGene00022173	set-27	down	Autosome
WBGene00022505	ZC21.3	down	Autosome
WBGene00022631	nekl-2	up	Autosome
