# Supplementary material for: Maternal H3K36 and H3K27 HMTs protect germline development via regulation of the transcription factor LIN-15B
Source: eLife. 2022 Aug 3;11:e77951. doi: 10.7554/eLife.77951 (PMC9348848; doi:10.7554/eLife.77951)
Supplement: Supplementary file 2. — For each oligo, its DNA or RNA sequence and a description of how it was used in the study are included. [file elife-77951-supp2.xlsx]

## Sheet: Sheet1
oligo name	purpose	DNA or RNA	sequence 5' -> 3'
sscc_oligo_1	PCR amplify cbp-3 cDNA fragment for cloning into L4440 RNAi feeding vector. Forward primer.	DNA	GAACCCGGGATGCTTGCACTGCATCAAGATCC
sscc_oligo_2	PCR amplify cbp-3 cDNA fragment for cloning into L4440 RNAi feeding vector. Reverse primer	DNA	GAGTCTAGACAATCATGGAACAACTGTGGATTCTTCA
sscc_oligo_3	PCR amplify lin-15B cDNA fragment for cloning into L4440 RNAi feeding vector. Forward primer	DNA	GAACCCGGGCCATCATGTCAATTCGCAACTTTATTGC
sscc_oligo_4	PCR amplify lin-15B cDNA fragment for cloning into L4440 RNAi feeding vector. Reverse primer	DNA	GAGTCTAGACACCGGATCAGTTGAAGGATGATT
sscc_oligo_5	PCR amplify lsy-2 cDNA fragment for cloning into L4440 RNAi feeding vector. Forward primer	DNA	GAACCCGGGATGGGGTTTCCTGAAGAAGATGAGA
sscc_oligo_6	PCR amplify lsy-2 cDNA fragment for cloning into L4440 RNAi feeding vector. Reverse primer	DNA	GAGTCTAGATCAAATCAACTGTGGTTCCATCATCT
sscc_oligo_7	PCR amplify eor-1 cDNA fragment for cloning into L4440 RNAi feeding vector. Forward primer	DNA	GAACCCGGGCCGGTTGCGACTACTCGTCG
sscc_oligo_8	PCR amplify eor-1 cDNA fragment for cloning into L4440 RNAi feeding vector. Reverse primer	DNA	GAGTCTAGATTATTGTACATTCCACGGATTCCATGC
sscc_oligo_9	PCR amplify sma-9 cDNA fragment for cloning into L4440 RNAi feeding vector. Forward primer.	DNA	GAACCCGGGGCTCAACAAGCTCAGCAAGCA
sscc_oligo_10	PCR amplify sma-9 cDNA fragment for cloning into L4440 RNAi feeding vector. Reverse primer	DNA	GAGTCTAGACCACTGCAGTGATGTAAAACAGCTT
sscc_oligo_11	Alt-R crRNA that anneals with an Alt-R tracrRNA to form a gRNA that was used generate the mes-3(bn199) CRISPR allele. This crRNA was generated by Integrated DNA Technologies (IDT) using their Alt-R technology.	RNA	/AltR1/CGGCAGAGGTGAAAGTTGGAGUUUUAGAGCUAUGCU/AltR2/
sscc_oligo_12	Single-stranded DNA repair template to generate mes-3(bn199) CRISPR allele. This is an Ultramer oligo from Integrated DNA Technologies (IDT).	DNA	AACACAAAAAATCATTGCAGGGTATGACTCCGGCGACGGCAGAGGTGAAAGTTGGATAACTAACTAAAGATCTAGAAAACGGAAGAATGGTTAGTTGGAGAATAGGACATTTACTGGAATTTA
sscc_oligo_13	Forward PCR primer to amplify mes-3(bn199) CRISPR allele.	DNA	GCTCAAAATGACAGAAAATGGACCG
sscc_oligo_14	Reverse PCR primer to amplify mes-3(bn199) CRISPR allele.	DNA	TTGCCGAAAATAATTTTCACTGGTGG
sscc_oligo_15	Sequencing primer to verify mes-3(bn199) CRISPR allele	DNA	TCCTTATCGAACCAGCCGTCTG
sscc_oligo_16	Sequencing primer to verify mes-3(bn199) CRISPR allele	DNA	AAAAGTTTCAGGCCGAGTTTCTCG
sscc_oligo_17	Alt-R crRNA that anneals with an Alt-R tracrRNA to form a gRNA that was used generate the drh-3(bn197) CRISPR allele. This crRNA was generated by Integrated DNA Technologies (IDT) using their Alt-R technology.	RNA	/AltR1/GCAACGTCAGUUGUUGAAGAGUUUUAGAGCUAUGCU/AltR2/
sscc_oligo_18	Single-stranded DNA repair template to generate drh-3(bn197) CRISPR allele. This is an Ultramer oligo from Integrated DNA Technologies (IDT).	DNA	ATTGACACTTGATAAATTCAACAATGGAAGACTTAAAGTAATTGTGGCAATGAGTGTCGTCGAGGAGGGTCTCGATGTTACTGCATGTAATCTTATTATCAAGTACAACTGTTCATC
sscc_oligo_19	Forward PCR primer to amplify drh-3(bn197) CRISPR allele.	DNA	CTGTCGAACTATGCTTGCCTGC
sscc_oligo_20	Reverse PCR primer to amplify drh-3(bn197) CRISPR allele.	DNA	CGATTCAACATGCAAAAATCTCCAT
sscc_oligo_21	Sequencing primer to verify drh-3(bn197) CRISPR allele	DNA	GAACCAGAAATTGTTCTACGTCTCAAG
sscc_oligo_22	Sequencing primer to verify drh-3(bn197) CRISPR allele	DNA	CTGCAGCCAATTGTTTCTCGC
sscc_oligo_23	Alt-R crRNA that anneals with an Alt-R tracrRNA to form a gRNA that was used generate the met-1(bn200) CRISPR allele. This crRNA was generated by Integrated DNA Technologies (IDT) using their Alt-R technology.	RNA	/AltR1/GCUGCAGCUGUACAGGACGGGUUUUAGAGCUAUGCU/AltR2/
sscc_oligo_24	Single-stranded DNA repair template to generate met-1(bn200) CRISPR allele. This is an Ultramer oligo from Integrated DNA Technologies (IDT).	DNA	CAGAACAGAAATGGTCCAAACGAGACGAAAGACAGCTGCAGCTGTACAGGACGGTAACTAACTAAAGATCTTGCCGTTAAGGAGAACAAAGCCAAGCCACCTGCCCCTCAAACGCCTACAA
sscc_oligo_25	Forward PCR primer to amplify met-1(bn200) CRISPR allele.	DNA	ACACACGGACAAGTGCTCCACCG
sscc_oligo_26	Reverse PCR primer to amplify met-1(bn200) CRISPR allele.	DNA	CCTAGGATCAGCTTCACTTGAATCGG
sscc_oligo_27	Sequencing primer to verify met-1(bn200) CRISPR allele	DNA	GAAGTTTGTCATCGACCAAGTTGG
sscc_oligo_28	Template-switching oligo (TSO) used in reverse transcription to generate double-stranded DNAs from mRNAs. This step was part of our protocol to generate transcript profiles from single sets of 2 PGCs or 2 EGCs. A biotin group was added to the 5' to prevent oligo concateramization. The last 3 bases (rGrG+G) are 2 ribo-Gs and a G with a locked nucleic acid (LNA).	DNA with some ribose bases	/5Biosg/AAGCAGTGGTATCAACGCAGAGTACATrGrG+G
sscc_oligo_29	PCR primer used to amplify double-stranded cDNA. This step was part of our protocol to generate transcript profiles from single sets of 2 PGCs or 2 EGCs. A biotin group was added to the 5' to prevent oligo concateramization.	DNA	/5Biosg/AAGCAGTGGTATCAACGCAGAGT
sscc_oligo_30	poly(dT)-anchored primer used in reverse transcription to generate double-stranded DNAs from mRNAs. This step was part of our protocol to generate transcript profiles from single sets of 2 PGCs or 2 EGCs. A biotin group was added to the 5' to prevent oligo concateramization.	DNA	/5Biosg/AAGCAGTGGTATCAACGCAGAGTACT(30)VN
